# Supplementary material for: Fascin limits Myosin activity within Drosophila border cells to control substrate stiffness and promote migration
Source: eLife journal article supplement (doi:10.7554/elife.69836), 2021-10-25
Supplement: supp [file elife-69836-supp-v1.zip]

Archive with 18 entries (18 files):
- elife_poa_e69836_Video_1.avi
- elife_poa_e69836_Video_2.avi
- elife_poa_e69836_Figure_2_figure_supplement_1.png
- elife_poa_e69836_Figure_4_figure_supplement_1.png
- elife_poa_e69836_Figure_5_figure_supplement_1.png
- elife_poa_e69836_Figure_7_figure_supplement_1.png
- elife_poa_e69836_Figure_2_source_data_1.xlsx
- elife_poa_e69836_Figure_2_figure_supplement_1_source_data_1.xlsx
- elife_poa_e69836_Figure_2_figure_supplement_1_source_data_2.zip
- elife_poa_e69836_Figure_3_source_data_1.xlsx
- elife_poa_e69836_Figure_4_source_data_1.xlsx
- elife_poa_e69836_Figure_4_figure_supplement_1_source_data_1.xlsx
- elife_poa_e69836_Figure_5_source_data_1.xlsx
- elife_poa_e69836_Figure_5_figure_supplement_1_source_data_1.xlsx
- elife_poa_e69836_Figure_6_source_data_1.xlsx
- elife_poa_e69836_Figure_7_source_data_1.xlsx
- elife_poa_e69836_Figure_7_figure_supplement_1_source_data_1.xlsx
- elife_poa_e69836_Transparent_Reporting_File.pdf
