# Supplementary material for: Fascin limits Myosin activity within Drosophila border cells to control substrate stiffness and promote migration
Source: eLife journal article supplement (doi:10.7554/elife.69836), 2021-10-25
Supplement: supp [file elife-69836-supp-v1.zip › elife_poa_e69836_Figure_2_figure_supplement_1_source_data_1.xlsx]

## Sheet: Sheet1
C: Nurse cell actin intensity			D: Nurse cell cytoplasm pMRLC			F: Western blot quans
yw	fascin-/-		yw	fascin-/-		Sample	IntDen-Zipper	Background	Corrected	IntDen-Vasa	Background	Corrected	Ratio	Average	Normailzed
1734.6	625.94		131.08	69.17		yw S1	Did not analyze
1239.65	592.18		149.31	85.83		yw S2	2842126	2117171	724955	4769521	2233157	2536364	0.285825	0.28847	0.990831
1048.78	642.76		159.94	111.29		yw S3	2277943	2112238	165705	2744690	2175481	569209	0.291115		1.00917
755.37	1605		163.41	138.28		sn28 S2	2782101	2119411	662690	4047020	2160525	1886495	0.351281		1.21774
1312.1	619.29		191.42	145.93		sn28 S3	2491193	2113093	378100	4158050	2156283	2001767	0.188883		0.654777
548.05	1143.77		194.31	153.38		sn28 S1	Did not analyze
780.26	893.61		197.13	164.08
652.11	1087.14		216.86	172.17
742.73	917.84		222.31	174.79
941.56	498.97		265.73	185.47		yw S1	2035248	1812252	222996	3497774	1808423	1689351	0.132001	0.114524	1.15261
264.84	713.97		297.46	204.38		yw S2	1991703	1814419	177284	3642784	1815984	1826800	0.0970462		0.84739
519.5	671.5		302.91	213.48		yw S3	Did not analyze
415.89	912.73		309.71	225.79		sn28 S1	2125411	1811382	314029	3798372	1820012	1978360	0.158732		1.38602
1263.02	952.96		322.17	243.86		sn28 S2	2091794	1806455	285339	4176621	1816624	2359997	0.120907		1.05573
837.44	1241.26		329.94	259.32		sn28 S3	Did not analyze
588.85	696.46		349.37	273.55
1783.92	490.72		354.06	274.07
2058.61	2046.57		383.27	287.01
952.18	1127.22		421.48	311.81
610.12	429.96		473.35	329.28
423.07	773.67		505.88	331.32
924.81	935.1		548.45	347.19
546.18	509.1		598.55	353.94
1173.47	546.54		686.33	361.03
1409.12	3310.5		725.14	364.35
473.38	1293.36			428.59
2147.86	1063.97			466.54
1303.53	1377.97			494.34
753.25	1384.52			619.67
557.1	1432.17
303.23	3428.86
761.11	1304.84
999.58	1733.33
1393	377.32
681.99	464.59
910	293.36
853.92	1488.14
1127	1548.59
620.54	264.26
925.37	599.5
735.84	408.44
507.61	997.91
630.18	1160.55
892.2	772.33
659.88	276.61
1904.15	587.02
1308.36	352.65
2066.44	783.15
1734.62	1143.95
1077.57	909.5
2154.66	1404.97
923.52	1030.35
1833.98	626.43
817.27	734.95
679.78	511.93
511.35	881.91
831.11	515.3
949.69	799.24
764.88	880.36
837	672.93
3086.2	461.18
876.66	230.35
1230.69	1912.9
405.07	958.4
1639	709
910.4	281.47
766.29	990.91
2575.62	3168.25
2088.94	333.74
1377.38	2320.96
2275.71	1956.94
874.97	1462.5
1892.79	682.12
1738.03	1120.52
1430.75	1746.37
3191.9	1406.28
2875.99	1427.28
2530.28	1600.35
	1936.32
	1493.34
	1867.87
	1259
	1368.15
	1049.05
	1174
	1213.45
	1338.34
	482.09
	2700.61
	1480.22
	1482.56
	2076.96
	1515.56
	1177.77
	2575
	1386.21
