# Supplementary material for: Fascin limits Myosin activity within Drosophila border cells to control substrate stiffness and promote migration
Source: eLife journal article supplement (doi:10.7554/elife.69836), 2021-10-25
Supplement: supp [file elife-69836-supp-v1.zip › elife_poa_e69836_Figure_2_source_data_1.xlsx]

## Sheet: Sheet1
C: Nurse cell pMRLC quan												D: Border cell pMRLC quan						E / F: puncta number and length															I: Live imaging puncta lifetime
genotype	psqh 1	actin 1	average 1	psqh 2	actin 2	average 2	psqh 3	actin 3	average 3	average total		genotype	Mean pixel intensity of cluster	Mean pixel intensity of background	pSqh pixel intensity (cluster-background)	cluster/background		genotype	number	puncta 1 area	puncta 1 length	puncta 1 location	puncta 2 area	puncta 2 length	puncta 2 location	puncta 3 area	puncta 3 length	puncta 3 location	puncta 4 area	puncta 4 length	puncta 4 location		genotpye	puncta	1	2	3	4	5	6	7	8	9	10	11	12	13	14	15
yw	802.56	1734.6	0.462677	666.35	755.37	0.88215	494.21	780.26	0.633391	0.659406		yw	464.55	329.94	134.61	1.40798		yw	0														fascin-/+	slides	3	2	3	2	3	2	4	3	1	2
yw	850.81	1239.65	0.686331	733.5	1312.1	0.559028	864.4	652.11	1.32554	0.856967		yw	384.398	354.06	30.338	1.08569		yw	0															time	90	60	90	60	90	60	120	90	30	60
yw	646.67	1048.78	0.616593	467.8	548.05	0.853572	384	742.73	0.517012	0.662392		yw	318.27	265.728	52.542	1.19773		yw	0														fascin-/+	slides	2	2	3	2	2	3	2	3	3	2	3	2	2
yw	437.25	941.56	0.464389	288.22	610.12	0.472399	321.52	557.1	0.577132	0.50464		yw	198.093	194.305	3.788	1.0195		yw	0															time	60	60	90	60	60	90	60	90	90	60	90	60	60
yw	380.31	264.84	1.436	364	423.07	0.860378	332.4	303.23	1.0962	1.13086		yw	240.646	216.861	23.785	1.10968		yw	1	4.446	4.532	4.913											fascin-/+	slides	2	2	2	1	3
yw	685.65	519.5	1.31983	500.44	924.81	0.541127	525.33	761.11	0.690216	0.85039		yw	321.495	302.913	18.582	1.06134		yw	4	2.889	3.164	53.094	9.478	4.065	18.573	8.238	4.296	1.131	8	4.718	2.602			time	60	60	60	30	90
yw	500.45	415.89	1.20332	510.62	546.18	0.934893	502.73	999.58	0.502941	0.880386		yw	346.173	297.46	48.713	1.16376		yw	1	7.2	5.16	6.059											fascin-/+	slides	2	1	2	2	2	4	1	2	2	3	1	4	2	4	2
yw	608.31	1263.02	0.481631	610.24	1173.47	0.52003	603	1393	0.432879	0.47818		yw	427.783	473.346	-45.563	0.903743		yw	0															time	60	30	60	60	60	120	30	60	60	90	30	120	60	120	60
yw	794	837.44	0.948128	904.94	1409.12	0.642202	1041.04	681.99	1.52647	1.03893		yw	544.954	598.549	-53.595	0.910458		yw	0														fascin-/-	slides	3	7	7	6	3	3	5	3	6	7	7
yw	700.91	588.85	1.1903	540	473.38	1.14073	405.07	910	0.445132	0.925389		yw	338.986	383.27	-44.284	0.884457		yw	3	7.823	3.866	23.617	4.507	2.125	179.576	6.815	3.608	21.852						time	90	210	210	180	90	90	150	90	180	210	210
yw	839.1	1783.92	0.470369	755.91	2147.86	0.351936	908.31	853.92	1.06369	0.628666		yw	473.537	505.877	-32.34	0.936071		yw	1	4.917	4.208	156.302											fascin-/-	slides	6	7	7	8	4	5	5	6	5
yw	1046.6	2058.61	0.508401	1061.2	1303.53	0.814097	996.13	1127	0.883878	0.735459		yw	624.827	686.329	-61.502	0.91039		yw	1	4.69	4.794	131.47												time	180	210	210	240	120	150	150	180	150
yw	855.5	952.18	0.898465	914.18	753.25	1.21365	998.05	620.54	1.60836	1.24016		yw	1527.13	725.138	801.996	2.10599		yw	1	7.579	2.344	3.113											fascin-/-	slides	3	4	4	5	3	7	5	7	3
yw	311.7	925.37	0.336838	171.08	735.84	0.232496	259.38	507.61	0.510983	0.360106		yw	161.031	159.94	1.091	1.00682		yw	3	4.542	3.128	29.759	2.84	3.295	133.712	1.863	3.54	2.91						time	90	120	120	150	90	210	150	210	90
yw	413.74	630.18	0.656543	392.33	892.2	0.439733	307.33	659.88	0.465736	0.520671		yw	194.93	163.41	31.52	1.19289		yw	4	1.814	2.873	24.804	1.392	2.626	123.02	0.47	1.016	171.316	0.568	2.652	164.111		fascin-/-	slides	5	3	5	4	4
yw	345.8	1904.15	0.181603	440.05	1308.36	0.336337	368.07	2066.44	0.178118	0.232019		yw	307.53	222.31	85.22	1.38334		yw	3	1.203	1.272	177.977	0.733	1.735	164.095	1.985	3.265	17.88						time	150	90	150	120	120
yw	366.74	1734.62	0.211424	277.24	1833.98	0.151168	304.67	831.11	0.366582	0.243058		yw	287.06	131.08	155.98	2.18996		yw	3	2.076	8.611	54.306	1.643	1.747	162.543	9.105	17.14	127.639
yw	300.37	1077.57	0.278748	256.83	817.27	0.314254	283.24	949.69	0.298245	0.297082		yw	231.1	197.13	33.97	1.17232		yw	1	2.247	10.391	26.32
yw	260	2154.66	0.120669	257.42	679.78	0.378681	217.66	764.88	0.284568	0.261306		yw	232.68	149.31	83.37	1.55837		yw	1	11.566	12.327	74.412
yw	1195.45	923.52	1.29445	1210.7	511.35	2.36765	1237	837	1.4779	1.71333		yw	1143.49	1014.34	129.15	1.12732		yw	2	10.846	8.011	130.629	4.782	6.035	106.077
yw	478.5	3086.2	0.155045	394.35	1230.69	0.32043	490.04	1639	0.298987	0.258154		yw	486.85	349.37	137.48	1.39351		yw	0
yw	655.5	876.66	0.747724	820.92	405.07	2.02661	641.37	910.4	0.704493	1.15961		yw	1030.02	548.45	481.57	1.87806		yw	3	1.777	5.995	21.066	1.246	3.188	0.875	0.745	3.327	124.513
yw	538.09	766.29	0.702202	558.05	2088.94	0.267145	476.04	2275.71	0.209183	0.392843		yw	370.98	322.17	48.81	1.1515		yw	0
yw	281.53	2575.62	0.109306	265.29	1377.38	0.192605	283.36	874.97	0.323851	0.208587		yw	227.39	191.42	35.97	1.18791		yw	0
yw	1041.97	1892.79	0.550494	858.08	1738.03	0.493708	1050.02	1430.75	0.733895	0.592699		yw	882.13	421.48	460.65	2.09293		yw	4	5.637	11.313	67.363	1.924	3.082	30.387	3.084	5.605	142.443	3.719	8.119	149.529
yw	393.54	3191.9	0.123293	414.64	2875.99	0.144173	417.07	2530.28	0.164832	0.144099		yw	347.1	309.71	37.39	1.12073		yw	0
fascin-/-	400.38	625.94	0.639646	721.61	592.18	1.21857	1518.32	642.76	2.36219	1.4068		fascin-/-	431.9	85.83	346.07	5.03204		fascin-/-	3	3.75	2.432	6.7	3.194	1.972	90.2	0.94	1.47	151.3
fascin-/-	1743	1605	1.08598	1773	713.97	2.4833	751.31	2046.57	0.367107	1.31213		fascin-/-	530.047	347.19	182.857	1.52668		fascin-/-	4	1.93	1.963	51.8	1.08	1.947	39.86	0.28	1.546	7.81	1.179	2.499	7.05
fascin-/-	972.54	619.29	1.57041	863.16	671.5	1.28542	796.78	1127.22	0.706854	1.18756		fascin-/-	499.286	329.276	170.01	1.51631		fascin-/-	3	1.832	2.894	49.38	2.009	2.647	175.92	1.704	1.648	16.95
fascin-/-	812.21	1143.77	0.710117	753.53	912.73	0.825578	1012.98	429.96	2.35599	1.29723		fascin-/-	239.113	204.384	34.729	1.16992		fascin-/-	4	4.287	5.866	121.7	3.273	2.217	44.6	4.763	6.339	106.89	1.612	1.799	156.59
fascin-/-	1760.47	893.61	1.97007	663.86	9522.96	0.0697115	1672	773.67	2.16113	1.4003		fascin-/-	356.512	243.859	112.653	1.46196		fascin-/-	1	2.901	0.281	136.99
fascin-/-	1193.31	1087.14	1.09766	802.43	1241.26	0.646464	731.7	935.1	0.782483	0.842202		fascin-/-	309.235	69.172	240.063	4.47052		fascin-/-	2	4.617	7.778	137.23	6.492	5.1	167.64
fascin-/-	945.81	917.84	1.03047	641.45	696.46	0.921015	323.65	509.1	0.63573	0.862406		fascin-/-	237.018	174.792	62.226	1.356		fascin-/-	3	3.713	3.095	167.32	2.308	2.154	87.65	4.269	5.511	4.31
fascin-/-	784.21	498.97	1.57166	436.83	490.72	0.890182	626.54	546.54	1.14638	1.20274		fascin-/-	319.918	213.484	106.434	1.49856		fascin-/-	1	3.304	4.471	152.44
fascin-/-	3997	3310.5	1.20737	4090.64	1377.97	2.9686	3583.5	3428.86	1.0451	1.74036		fascin-/-	959.001	466.54	492.461	2.05556		fascin-/-	4	4.598	2.98	21.79	2.559	3.057	50.74	1.362	1.673	172.37	3.737	1.496	141.67
fascin-/-	1323.73	1293.36	1.02348	2634.97	1384.52	1.90316	1868.35	1304.84	1.43186	1.45284		fascin-/-	530.46	225.794	304.666	2.34931		fascin-/-	0
fascin-/-	2366	1063.97	2.22375	2069.47	1432.17	1.44499	1853.6	1733.33	1.06939	1.57937		fascin-/-	459.035	331.317	127.718	1.38549		fascin-/-	2	11.25	10.82	21.98	2.882	2.454	78.84
fascin-/-	2910.92	377.32	7.71472	1137.62	264.26	4.30493	1422.6	772.33	1.84196	4.62054		fascin-/-	495.29	274.07	221.22	1.80717		fascin-/-	2	4.055	3.773	80.37	9.844	6.531	142.04
fascin-/-	863.77	464.59	1.85921	472.25	599.5	0.78774	346.7	276.61	1.25339	1.30011		fascin-/-	440.19	273.55	166.64	1.60918		fascin-/-	3	5.337	6.022	14.22	1.008	1.119	178.88	4.69	3.048	148.25
fascin-/-	680.14	293.36	2.31845	231.65	408.44	0.567158	476.7	587.02	0.812068	1.23256		fascin-/-	209.79	87.53	122.26	2.39678		fascin-/-	3	1.209	1.344	92.4	2.412	2.238	6.97	1.398	1.407	179.07
fascin-/-	1620.13	1488.14	1.08869	684.99	997.91	0.686425	1055.35	352.65	2.99263	1.58925		fascin-/-	281.87	82.17	199.7	3.43033		fascin-/-	1	3.383	3.266	129.98
fascin-/-	906	1548.59	0.585048	176.28	1160.55	0.151893	214.49	783.15	0.273881	0.336941		fascin-/-	164.22	111.29	52.93	1.4756		fascin-/-	1	8.409	8.184	176.72
fascin-/-	1186.97	1143.95	1.03761	576.6	511.93	1.12633	235.7	461.18	0.51108	0.891671		fascin-/-	199.26	84.57	114.69	2.35615		fascin-/-	2	11.389	3.2	14.78	9.412	1.831	99.65
fascin-/-	1107	909.5	1.21715	1515.91	881.91	1.71889	313.71	230.35	1.36188	1.43264		fascin-/-	341.63	138.28	203.35	2.47057		fascin-/-	2	0.702	1.236	102.2	2.027	2.032	168.32
fascin-/-	844.26	1404.97	0.60091	995.9	515.3	1.93266	1722.6	1912.9	0.900518	1.1447		fascin-/-	341.82	172.17	169.65	1.98536		fascin-/-	2	2.4499	2.293	7.54	0.867	0.824	168.73
fascin-/-	937.34	1030.35	0.90973	778.03	799.24	0.973462	1058.1	958.4	1.10403	0.99574		fascin-/-	212.18	145.93	66.25	1.45398		fascin-/-	4	3.542	2.503	27	2.101	2.244	83.51	0.983	1.114	153.28	2.357	2.291	170.9
fascin-/-	459	626.43	0.732724	621.26	880.36	0.705689	770.57	709	1.08684	0.841751		fascin-/-	249.92	153.38	96.54	1.62942		fascin-/-	4	4.171	3.526	33.118	2.583	1.969	63.203	3.713	4.307	128.71	5.594	5.041	18.05
fascin-/-	708.13	734.95	0.963508	684.58	672.93	1.01731	360.05	281.47	1.27918	1.08667		fascin-/-	306.11	185.47	120.64	1.65046		fascin-/-	2	3.45	2.544	94.582	4.635	2.713	62.525
fascin-/-	1057	990.91	1.0667	3031.86	3168.25	0.956951	402.06	333.74	1.20471	1.07612		fascin-/-	288.74	164.08	124.66	1.75975		fascin-/-	4	12.892	4.047	173.42	1.05	1.272	126.91	9.539	7.303	48.98
fascin-/-	2122.62	2320.96	0.914544	2720.96	1120.52	2.4283	3138.13	1600.35	1.9609	1.76792		fascin-/-	1338.22	619.67	718.55	2.15957		fascin-/-	4	3.78	4.053	38.408	2.974	2.677	15.725	2.461	3.956	42.08	2.376	2.628	166.412
fascin-/-	4095	1956.94	2.09255	1942.82	1746.37	1.11249	927.05	1936.32	0.478769	1.22794		fascin-/-	806.69	364.35	442.34	2.21405		fascin-/-	4	5.893	3.829	1.397	1.637	1.632	16.029	5.325	2.97	49.661	2.534	1.882	163.731
fascin-/-	2740.28	1462.5	1.8737	959.7	1406.28	0.682439	1776.75	1493.34	1.18978	1.24864		fascin-/-	987.3	353.94	633.36	2.78946		fascin-/-	4	5.249	3.586	17.435	2.791	2.845	26.98	3.554	2.424	49.286	3.866	2.695	172.668
fascin-/-	886.61	682.12	1.29979	1499.22	1427.28	1.0504	1120.4	1867.87	0.599828	0.983339		fascin-/-	981.92	428.59	553.33	2.29105		fascin-/-	4	2.4	1.997	23.135	1.27	1.96	33.016	1.899	2.976	100.145	3.957	5.122	164.512
fascin-/-	2114.33	1259	1.67937	2299.93	1368.15	1.68105	1722.86	1049.05	1.6423	1.66758		fascin-/-	1218.08	494.34	723.74	2.46405		fascin-/-	4	8.922	4.023	51.69	5.35	4.65	110.213	5.521	2.901	155.216	5.362	3.713	167.69
fascin-/-	2743.97	1174	2.33728	1983.2	1213.45	1.63435	2059	1515.56	1.35857	1.77673		fascin-/-	756.35	361.03	395.32	2.09498		fascin-/-	3	5.429	4.755	31.31	4.879	3.68	154.05	6.699	6.172	87.66
fascin-/-	1975.5	1480.22	1.3346	1348.87	1338.34	1.00787	1444.81	1177.77	1.22673	1.18973		fascin-/-	581.74	287.01	294.73	2.0269		fascin-/-	1	3.102	2.441	169.679
fascin-/-	1409	1482.56	0.950383	1617.26	482.09	3.35468	1448.81	2575	0.562645	1.62257		fascin-/-	496.75	311.81	184.94	1.59312		fascin-/-	4	8.531	5.918	2.501	2.693	2.111	38.894	0.995	1.763	122.215	2.766	2.848	110.31
fascin-/-	2890.05	2076.96	1.39148	2711.21	2700.61	1.00393	1410.01	1386.21	1.01717	1.13752		fascin-/-	747.85	259.32	488.53	2.88389		fascin-/-	4	5.502	3.213	171.677	2.876	4.543	38.926	3.951	2.688	2.375	2.736	3.567	50.538
[truncated: 4 more columns]
