# Supplementary material for: Fascin limits Myosin activity within Drosophila border cells to control substrate stiffness and promote migration
Source: eLife journal article supplement (doi:10.7554/elife.69836), 2021-10-25
Supplement: supp [file elife-69836-supp-v1.zip › elife_poa_e69836_Figure_3_source_data_1.xlsx]

## Sheet: Sheet1
F: AFM (kPa)
yw basement membrane	fascin-/- basement membrane	yw nurse cell	fascin-/- nurse cell
20.36	12.7	6.86	38.5
21.3	13.4	7.01	37.05
20.5	18.8	6.88	37.27
18	27	6.67	39.17
18.93	17.5	6.8	41.13
20.97	19	6.49	38.3
27	12.5	6.65	39.2
20.89	20.4	6.78	28.7
20.41	20	6.54	27.9
20.21	21.8	6.54	27.4
20.8	27.7	6.55	31.6
19.66	8.26	6.38	31.22
18	13.7	6.35	30.8
19.4	11.8	6.1	34.97
17.5	23	5.86	33.33
15	8.72	6.08	32.38
20.36	12.7	6.71	31.38
17.46	14.9	6.1	38.36
19.36	15.8	6.52	37.36
20.82	19.22	6.72	37.5
18.5	17	6.53	36.22
21.61	15.2	4.36	34.47
19.54	16	6.55	34.39
17.52	11.2	6.52	33.26
19.77	18.6	6.53	32.22
19.32	27	6.67	31.02
18.76	22.53	6.54	31.11
22	20.5	6.15	30.43
20.96	20.8	7.13	31.78
23.33	12	7.24	25.94
23.96	19.88	7.18	25.97
24.38	17.8	6.98	24.53
22.38	25	7.1	23.28
20.6	39	7.02	22.9
20.5	33	7.01	23.62
24.34	33.3	7.64	22.7
22.61	20.3	7.65	27.68
23.5	34.5	7.4	43.69
23.7	49.4	7.39	45.6
23.2	25.6	7.41	43.38
26.09	31.8	8.1	47.52
22.75	37.7	7.98	26.67
26	30.9	7.75	25.8
25.57	35.8	7.8	25.41
24.4	24	8.02	25.07
26.01	30.3	8.04	24.09
22.88	30.6	8.07	25.74
26	32.7	10.88	31.86
18.3	22	11.22	10.16
23.5	25.5	11	11.2
22	45.2	10.56	12.16
27.8	13.11	10.66	11.6
23.4	48	13.17	13.43
24.38	49	12.63	23.25
26.16	48	12.68	18.84
25.9	28	12.2	18.24
25.5	24	12.47	23.19
25.4	41	12.51	18.41
22.6	33	13.52	19.98
26.55	34.6	13.19	15.38
26.7	31	14.05	15.08
25.69	43	13.79	16.09
27.8	37	14.05	15.27
26	42.3	13.64	16.87
27.33	32.23	13.43	22.35
27.13	35.6	13.28	19.33
27.6	37	13.29	21.6
24.43	40.6	13.25	23.79
30	40	13.75	21.08
27.6	32	13.55	25.16
26.69	42	13.8	18.49
26.17	42.5	12.61	20.2
26.7	47.2	12.64	23.81
25.7	62.6	12.76	18.34
27.3	32	13.3	16.98
28.27	52	13.04	19.06
27.14	41	12.85	22.3
27.6	46.5	12.19	20.53
30.1	28.4	14.35	17.05
28.5	52	13.98	21.87
26	37.6	13.68	21.1
25.7	44.16	13.68	20.92
24.3	31.43	13.74	19.86
28	49	14.05	20.22
27.5	40	13.82	16.75
25.4	48.7	13.77	16.39
27.3	39.5	13.06	18.9
27.4		13.75	19.47
27.7	64.8	14.15	19.26
28.9	25.4	13.36
30.5		12.54
26	66	13.13
27.7	32.15	13.29
27.4		13.76
28.8	65	13.3
29	28.11	13.34
29.7	11.9	13.66
30.1	18.9	12.98
30.8	19.68	12.75
27.8	11	13.7
28.4	9.5
25.7	10.3
	10.25
	39.7
	19
	9
	11
	12.24
	10.97
	25.6
	19.85
	10.57
	11.5
	14.7
	25.8
	23.22
	19.8
	12.14
	11.2
	23
	29.95
	12.7
	13
	18.7
	21.17
	18.4
	6.8
	28.24
	12.3
	19
	23.65
	22.52
	12.8
	15
	13.2
	19.3
	14
	8
	34.53
