# Supplementary material for: Fascin limits Myosin activity within Drosophila border cells to control substrate stiffness and promote migration
Source: eLife journal article supplement (doi:10.7554/elife.69836), 2021-10-25
Supplement: supp [file elife-69836-supp-v1.zip › elife_poa_e69836_Figure_4_figure_supplement_1_source_data_1.xlsx]

## Sheet: Sheet1
A: Nurse cell pMRLC quan												B: Border cell pMRLC quan					C: Nurse cell pMRLC quan												D: Border cell pMRLC quan
genotype	psqh 1	actin 1	average 1	psqh 2	actin 2	average 2	psqh 3	actin 3	average 3	average total		genotype	Mean pixel intensity of cluster	Mean pixel intensity of background	cluster/background		genotype	psqh 1	actin 1	average 1	psqh 2	actin 2	average 2	psqh 3	actin 3	average 3	average total		genotype	Mean pixel intensity of cluster	Mean pixel intensity of background	cluster/background
yw	427.2	1605.5	0.266085	686.9	1577.3	0.435491	2345	1206.4	1.9438	0.881792		yw	1025.9	409.4	2.50586		+/sqh RNAi	647.6	1247.8	0.518993	1019.2	1048	0.972519	897.2	704.2	1.27407	0.921861		+/sqh RNAi	517.3	383.5	1.34889
yw	428.4	579.4	0.739386	415.6	644.2	0.645141	511.1	427.2	1.1964	0.860307		yw	752.8	786	0.957761		+/sqh RNAi	1013.5	787.4	1.28715	973.2	1248.8	0.779308	1026.9	2046.9	0.501685	0.856047		+/sqh RNAi	714.8	609.2	1.17334
yw	417.9	534.6	0.781706	383.1	738.3	0.518895	254.8	558.4	0.456304	0.585635		yw	666.8	560.3	1.19008		+/sqh RNAi	1027.4	406.6	2.52681	1187.5	390.9	3.03786	638.6	270.1	2.36431	2.64299		+/sqh RNAi	756.8	520.3	1.45455
yw	257.9	900.3	0.28646	251.8	167	1.50778	175.2	983.2	0.178194	0.657479		yw	277.3	234.4	1.18302		+/sqh RNAi	1553.3	1103.6	1.40748	805.5	344.7	2.33681	888.1	138.7	6.40303	3.38244		+/sqh RNAi	658.5	473.1	1.39188
yw	448.7	657.9	0.682019	480.3	938.4	0.511829	345	869.7	0.396689	0.530179		yw	448.1	771.9	0.580516		+/sqh RNAi	329.4	218.7	1.50617	335.6	272.7	1.23066	474	324	1.46296	1.39993		+/sqh RNAi	249.2	235.4	1.05862
yw	1465.8	2343	0.625608	2237	1581	1.41493	340.1	1581.4	0.215063	0.751866		yw	456.3	313.8	1.45411		+/sqh RNAi	444	228.6	1.94226	529.8	250.2	2.11751	416.3	248.8	1.67323	1.911		+/sqh RNAi	399.7	327.5	1.22046
yw	257.1	237.4	1.08298	220.3	174.3	1.26391	177	161.6	1.0953	1.1474		yw	128.8	135.5	0.950554		+/sqh RNAi	442.9	344.1	1.28713	1238.6	823.6	1.50389	839	1092.3	0.768104	1.18637		+/sqh RNAi	456.7	302.9	1.50776
yw	398	497	0.800805	785	647.6	1.21217	440	582.9	0.754846	0.922606		yw	1214.4	1012.8	1.19905		+/sqh RNAi	188.4	296.3	0.635842	117.9	137.4	0.858079	875.5	474.1	1.84666	1.11353		+/sqh RNAi	1378	858.1	1.60587
yw	3895	2988	1.30355	1578.7	1782.1	0.885865	1808.9	1870	0.967326	1.05225		yw	1237.2	1194.1	1.03609		+/sqh RNAi	232.1	191.7	1.21075	258	253.7	1.01695	229.6	370.7	0.619369	0.949021		+/sqh RNAi	144.6	152.4	0.948819
yw	565.4	1138.9	0.496444	506.4	705.5	0.717789	532	770.4	0.69055	0.634928		yw	119.1	172.8	0.689236		+/sqh RNAi	377.6	326	1.15828	319	139	2.29496	337.1	215.6	1.56354	1.67226		+/sqh RNAi	261.1	346.8	0.752884
yw	343.5	1754.6	0.195771	346	1547.6	0.223572	484.4	1878.2	0.257907	0.22575		yw	102.6	164.2	0.624848		+/sqh RNAi	347.6	214	1.6243	291.5	232.8	1.25215	357	177.2	2.01467	1.63037		+/sqh RNAi	238.5	318.4	0.749058
yw	882.9	1757.7	0.502304	478	1099	0.434941	515.1	1002.5	0.513815	0.483687		yw	508.9	368.5	1.381		+/sqh RNAi	359	297.9	1.2051	346.2	286.4	1.2088	442	339.3	1.30268	1.23886		+/sqh RNAi	334.7	336.3	0.995242
yw	668.6	1869.4	0.357655	990.9	1853.9	0.534495	546.9	1317	0.415262	0.435804		yw	732.6	568.9	1.28775		+/sqh RNAi	701.2	126.7	5.53433	763.3	186.6	4.09057	682.6	289.4	2.35867	3.99452		+/sqh RNAi	457.1	347.3	1.31615
yw	401.7	3372.2	0.119121	235.3	1998.5	0.117738	217.9	2245.7	0.0970299	0.111296		yw	254.7	129.8	1.96225		+/sqh RNAi	133	386	0.34456	283.4	139	2.03885	296.6	372	0.797312	1.06024		+/sqh RNAi	211.1	309.6	0.681848
fascin-/-	1174	419.4	2.79924	1018.4	467.6	2.17793	994	507	1.96055	2.31257		fascin-/-	655.9	411.8	1.59276		+/sqh RNAi	281.5	240.9	1.16853	236.9	398.9	0.593883	244.9	273.9	0.894122	0.885513		+/sqh RNAi	131.2	276.9	0.473817
fascin-/-	842.8	736.8	1.14387	609	443.6	1.37286	939.6	723.4	1.29887	1.27186		fascin-/-	649.8	246.3	2.63825		+/sqh RNAi	493.6	123.5	3.99676	314.9	230	1.36913	508.6	475.7	1.06916	2.14502		+/sqh RNAi	301.1	532.1	0.565871
fascin-/-	1355	1076	1.25929	1512.9	1359.4	1.11292	1737.8	927.6	1.87344	1.41522		fascin-/-	783.1	266.3	2.94067		+/sqh RNAi	343.8	298.4	1.15214	389	318.7	1.22058	116	170.8	0.679157	1.0173		+/sqh RNAi	310.8	256.9	1.20981
fascin-/-	1868.9	780.5	2.39449	1220.5	560.2	2.17869	2553	703.5	3.629	2.73406		fascin-/-	1286.4	453.6	2.83598		+/sqh RNAi	356.9	226.4	1.57641	312.6	197.3	1.58439	293.4	182.1	1.6112	1.59067		+/sqh RNAi	213	289	0.737024
fascin-/-	871.1	89.1	9.77666	67.6	127	0.532283	768.7	98.4	7.81199	6.04031		fascin-/-	67.8	29.9	2.26756		osk/+	876.7	456.7	1.91964	953	1145	0.832314	868	1480	0.586486	1.11281		osk/+	860.5	495.9	1.73523
fascin-/-	407.9	198.3	2.05698	1154.7	280.3	4.11951	1767.5	471.2	3.75106	3.30919		fascin-/-	297.4	98.5	3.01929		osk/+	713.5	1788.2	0.399005	537	1896.7	0.283123	590	1150	0.513043	0.39839		osk/+	356.3	433.9	0.821157
fascin-/-	579.5	200.4	2.89172	588.2	305.7	1.92411	1098.1	222.6	4.93306	3.24963		fascin-/-	279.1	118.2	2.36125		osk/+	410.4	463	0.886393	455.7	552.7	0.824498	483.3	522.8	0.924445	0.878445		osk/+	278.5	277.1	1.00505
fascin-/-	253.7	1075	0.236	1154.4	1521.6	0.758675	106	1132	0.0936396	0.362772		fascin-/-	115.9	85.1	1.36193		osk/+	414.7	352.9	1.17512	474	250	1.896	602.3	345.1	1.74529	1.60547		osk/+	296.9	266.2	1.11533
fascin-/- y27632	535	937	0.570971	559.6	1575.7	0.355144	720.6	1759.2	0.409618	0.445244		fascin-/- y27632	522.1	716.7	0.728478		osk/+	750.1	245.7	3.05291	668.3	143.1	4.67016	1566.1	566	2.76696	3.49668		osk/+	1500.9	359.8	4.17148
fascin-/- y27633	482.3	1341.6	0.359496	734.4	1285.8	0.571162	523.2	1621.7	0.322624	0.417761		fascin-/- y27633	436.7	439.8	0.992951		osk/+	355.5	305	1.16557	445.2	410.3	1.08506	295.4	253.6	1.16483	1.13849		osk/+	266.3	324.7	0.820142
fascin-/- y27634	458.3	1184.3	0.38698	362.8	962.6	0.376896	469.2	1299.2	0.361145	0.375007		fascin-/- y27634	341.3	344.1	0.991863		osk/+	641.5	514.1	1.24781	710.2	967.9	0.733753	749.3	425.7	1.76016	1.24724		osk/+	497.8	498.2	0.999197
fascin-/- y27635	1275	2032.7	0.627245	1297	736	1.76223	1243	479	2.59499	1.66149		fascin-/- y27635	1451.7	1901.1	0.763611		osk/+	798.6	847.1	0.942746	810.2	1184	0.684291	1016.8	956.6	1.06293	0.896656		osk/+	525.8	461.8	1.13859
fascin-/- y27636	874	1813.5	0.481941	1256.4	2051.5	0.61243	1325.1	1493.8	0.887067	0.660479		fascin-/- y27636	850.3	1253.3	0.678449		osk/+	681.4	498.3	1.36745	669.1	1632.1	0.409963	642.8	380.5	1.68936	1.15559		osk/+	533.7	348.2	1.53274
fascin-/- y27637	347.3	1950.9	0.17802	362	1665.9	0.2173	460.9	1723.6	0.267405	0.220909		fascin-/- y27637	295.9	268.4	1.10246		osk/+	683.3	1076.6	0.634683	599.6	1668.9	0.359279	535.4	928.8	0.576443	0.523468		osk/+	432.3	425.5	1.01598
fascin-/- y27638	591.8	882.5	0.670595	373.3	977	0.382088	251.2	621.4	0.404248	0.485644		fascin-/- y27638	323.7	307.3	1.05337		osk/+	380.7	782.3	0.486642	377.5	2345.6	0.16094	471.5	1523.1	0.309566	0.319049		osk/+	351.8	283.1	1.24267
fascin-/- y27639	692.7	1808.6	0.383003	575.3	724.1	0.794504	519.3	1240.9	0.418487	0.531998		fascin-/- y27639	891.5	778.1	1.14574		osk/+	545.3	551.4	0.988937	491.9	668.7	0.735606	509.7	562.7	0.905811	0.876785		osk/+	349.1	315.6	1.10615
fascin-/- y27640	1038	1942	0.534501	864.3	1513.2	0.571174	590.6	1361.5	0.433786	0.513153		fascin-/- y27640	742	747.5	0.992642		osk/+	343.2	222.2	1.54455	372.1	203.5	1.8285	139.7	424.1	0.329403	1.23415		osk/+	219.1	199.8	1.0966
fascin-/- y27641	220	1799.8	0.122236	206.5	1034.1	0.199691	274.4	1417.7	0.193553	0.171826		fascin-/- y27641	184.1	134.1	1.37286		osk/+	595	145.7	4.08373	452.4	565	0.800708	611.3	485.3	1.25963	2.04802		osk/+	453.1	296.5	1.52816
fascin-/- y27642	197.6	1466.3	0.134761	332.7	1735	0.191758	249.5	1422.1	0.175445	0.167321		fascin-/- y27642	101	132.3	0.763416		osk/+	394.2	125	3.1536	325.6	256.2	1.27088	370.5	730.2	0.507395	1.64396		osk/+	313.9	264.4	1.18722
fascin-/- y27643	225	1241.9	0.181174	139.8	1976	0.070749	194.3	1275.8	0.152297	0.13474		fascin-/- y27643	118.2	121.4	0.973641		osk/+	394	326.8	1.20563	653.2	275.8	2.36838	523.1	610.4	0.856979	1.477		osk/+	364.2	286.1	1.27298
fascin-/- y27644	182	1779.8	0.102259	157	2470	0.0635628	196	2574	0.0761461	0.0806558		fascin-/- y27644	106.8	137.7	0.775599		osk/+	418.2	339	1.23363	400.7	308.5	1.29887	511.1	493.7	1.03524	1.18925		osk/+	355.7	395.1	0.900278
fascin-/- y27645	576.5	743.5	0.775387	502.4	694.9	0.722982	976.1	1950.4	0.500461	0.666277		fascin-/- y27645	733.1	421.6	1.73885		osk/+	427.5	690.7	0.618937	383.2	216.1	1.77325	392.1	394.8	0.993161	1.12845		osk/+	260.4	365.7	0.712059
fascin-/- y27646	851.6	3539.8	0.240579	884.6	3302	0.267898	688.5	2815	0.244583	0.25102		fascin-/- y27646	696.8	450	1.54844		osk/+	453	459.5	0.985854	578.1	849.5	0.680518	786.4	405.5	1.93933	1.2019		osk/+	336.8	340.1	0.990297
fascin-/- y27647	246	2188.4	0.112411	224.8	2033	0.110576	254.6	1610.7	0.158068	0.127018		fascin-/- y27647	149.4	187.1	0.798503		osk/+	391.6	364.3	1.07494	487.6	252.3	1.93262	377.7	207.7	1.81849	1.60868		osk/+	322.2	322.9	0.997832
fascin-/- y27648	384.3	2342.3	0.16407	270.8	3760	0.0720213	433.3	3163.9	0.136951	0.124347		fascin-/- y27648	205.6	218.6	0.940531		osk/+	489.7	578.3	0.846792	432.7	377.5	1.14623	566.4	552.2	1.02572	1.00624		osk/+	361.1	346	1.04364
fascin-/- y27649	159.6	2186	0.0730101	310.1	2221.6	0.139584	280	1722	0.162602	0.125065		fascin-/- y27649	145.9	156.6	0.931673		osk/+	436.8	489	0.893252	558.7	573.4	0.974363	471.9	336.4	1.40279	1.09014		osk/+	427.3	304.4	1.40375
fascin-/- y27650	200.4	1140.9	0.175651	154.8	1181.3	0.131042	194.5	905.7	0.214751	0.173815		fascin-/- y27650	114.3	114.9	0.994778		osk/+	415.2	485.6	0.855025	453.7	361	1.25679	436.6	428.8	1.01819	1.04333		osk/+	294.8	337.2	0.874259
fascin-/- y27651	345	812	0.424877	319	748.9	0.425958	265.9	776.6	0.34239	0.397742		fascin-/- y27651	201.2	182.8	1.10066		osk/+	604.8	1392.8	0.434233	1438.1	1800.1	0.7989	610.1	1618.4	0.376977	0.536704		osk/+	712.7	463.8	1.53665
fascin-/- y27652	130.3	1303.1	0.0999923	183	1790	0.102235	181.2	1572.5	0.115231	0.105819		fascin-/- y27652	109.6	102.5	1.06927		osk/+	296.6	126.7	2.34096	335	226.7	1.47772	1143.1	1410.2	0.810594	1.54309		osk/+	222.6	236.6	0.940828
fascin-/- y27653	197.9	865.4	0.22868	222.1	1165.1	0.190627	214.4	921.7	0.232614	0.217307		fascin-/- y27653	124.6	163.1	0.763948		osk/+	155.4	150.4	1.03324	115	204.1	0.563449	160.6	169.3	0.948612	0.848435		osk/+	208.9	229.4	0.910636
fascin-/- y27654	171.2	1053.6	0.162491	229.5	1097.1	0.209188	192.6	914.4	0.21063	0.194103		fascin-/- y27654	85.3	133.4	0.63943		osk/+	297.7	282	1.05567	273.2	316.3	0.863737	296.4	392.1	0.75593	0.89178		osk/+	280.1	187.1	1.49706
fascin-/- bleb	1328.4	1251.8	1.06119	1301.7	1397.9	0.931182	1326.1	1224.5	1.08297	1.02512		fascin-/- bleb	1332.5	1721.6	0.773989		osk/+	421.8	286.9	1.4702	375.5	891.2	0.421342	313.3	309.1	1.01359	0.968376		osk/+	194.3	210.6	0.922602
fascin-/- bleb	634.9	547.5	1.15963	618.2	525.7	1.17596	448	363.3	1.23314	1.18958		fascin-/- bleb	412.5	441.6	0.934103		osk/+	564.1	521.2	1.08231	1236.1	1271.4	0.972235	321	332.2	0.966285	1.00694		osk/+	366.9	216.8	1.69234
fascin-/- bleb	1255.9	2534.1	0.4956	1310.6	1974.4	0.663797	1424.6	2068.1	0.688845	0.61608		fascin-/- bleb	980.2	1009.1	0.971361		osk/+	203.4	701.3	0.290033	1262	1031	1.22405	238.8	409	0.583863	0.699317		osk/+	166.8	176.1	0.947189
fascin-/- bleb	1956.1	1950.1	1.00308	1424	1756	0.810934	1096	1496.4	0.732424	0.848812		fascin-/- bleb	1800.6	1078.2	1.67001		osk/sqh RNAi	444	237.7	1.8679	351.2	229	1.53362	486.5	324.8	1.49784	1.63312		osk/sqh RNAi	551.3	531.6	1.03706
fascin-/- bleb	668	3634.6	0.183789	617	3486	0.176994	597.6	3626.4	0.164792	0.175191		fascin-/- bleb	450.2	497.3	0.905289		osk/sqh RNAi	374.3	413.8	0.904543	497.3	497.1	1.0004	375.6	308.6	1.21711	1.04069		osk/sqh RNAi	234.2	246.7	0.949331
fascin-/- bleb	450.3	1920.4	0.234482	425.1	2041.3	0.20825	858.8	1875.9	0.457807	0.30018		fascin-/- bleb	529.3	579.4	0.913531		osk/sqh RNAi	552.8	409.2	1.35093	664	460	1.44348	621	462	1.34416	1.37952		osk/sqh RNAi	661.9	351.5	1.88307
fascin-/- bleb	246.8	791.5	0.311813	418.1	813.1	0.514205	392.5	773.8	0.507237	0.444418		fascin-/- bleb	234.8	179.4	1.30881		osk/sqh RNAi	461.6	708.6	0.651425	317	917	0.345692	337.9	568.6	0.594267	0.530461		osk/sqh RNAi	594.6	266.7	2.22947
fascin-/- bleb	607.8	1506.3	0.403505	682	2138	0.31899	548.3	1646.3	0.33305	0.351848		fascin-/- bleb	457.5	442.2	1.0346		osk/sqh RNAi	492	297	1.65657	429.6	877	0.489852	756.2	964.1	0.784358	0.976925		osk/sqh RNAi	436.6	289.8	1.50656
fascin-/- bleb	1233.1	1439.9	0.856379	659	944	0.698093	520.3	1855	0.280485	0.611652		fascin-/- bleb	505.6	512.2	0.987114		osk/sqh RNAi	147.8	316.2	0.467426	204.6	289.4	0.70698	246.3	379.9	0.648329	0.607578		osk/sqh RNAi	707.3	134.3	5.26657
fascin-/- bleb	447.3	3681.2	0.121509	422	3938	0.107161	537	3910	0.13734	0.122003		fascin-/- bleb	331.3	338.1	0.979888		osk/sqh RNAi	296	471.3	0.62805	263.3	381.6	0.68999	277.6	484.9	0.572489	0.630176		osk/sqh RNAi	530.8	154.6	3.43338
fascin-/- bleb	292.2	3220.8	0.0907228	432.7	839.1	0.515672	231.7	922.2	0.251247	0.28588		fascin-/- bleb	234	223.4	1.04745		osk/sqh RNAi	497.7	517.7	0.961368	431.9	367.3	1.17588	300.6	453.4	0.662991	0.933412		osk/sqh RNAi	411.3	305.9	1.34456
fascin-/- bleb	318.9	2443.1	0.130531	386.4	3004	0.128628	442	4095	0.107937	0.122365		fascin-/- bleb	280.1	260.1	1.07689		osk/sqh RNAi	429.1	221.4	1.93812	134.1	264.9	0.506229	245.1	371	0.660647	1.035		osk/sqh RNAi	548.1	173.8	3.15362
fascin-/- bleb	348	2147.8	0.162026	302	1151.4	0.262289	344.8	2945.2	0.117072	0.180462		fascin-/- bleb	179.3	221	0.811312		osk/sqh RNAi	414.4	640	0.6475	314	427	0.735363	361.5	184.3	1.96148	1.11478		osk/sqh RNAi	360.6	170.1	2.11993
fascin-/- bleb	299	1838.9	0.162597	369.4	1566.6	0.235797	309.2	1460.1	0.211766	0.203387		fascin-/- bleb	173.3	164.8	1.05158		osk/sqh RNAi	447.1	277.8	1.60943	489.5	294.1	1.6644	580	173.4	3.34487	2.20623		osk/sqh RNAi	771.4	264.6	2.91534
fascin-/- bleb	487	1919.2	0.253752	535.1	1454.6	0.367867	341.6	1558.7	0.219157	0.280259		fascin-/- bleb	437	331.3	1.31905		osk/sqh RNAi	659.4	2699.7	0.244249	571	2250.8	0.253688	455	1890	0.240741	0.246226		osk/sqh RNAi	531.8	332.7	1.59844
fascin-/- bleb	1268.8	430.8	2.94522	1174.7	1052.8	1.11579	612	501	1.22156	1.76085		fascin-/- bleb	577.7	435.9	1.3253		osk/sqh RNAi	641.2	3026.4	0.211869	589.3	2073.3	0.284233	600	1123	0.534283	0.343462		osk/sqh RNAi	586.7	444.5	1.31991
fascin-/- bleb	403.3	452	0.892257	430.8	606	0.710891	388.1	660.4	0.587674	0.730274		fascin-/- bleb	396.2	378.5	1.04676		osk/sqh RNAi	715.6	2582	0.277149	372.1	1018.6	0.365305	357.5	981.3	0.364313	0.335589		osk/sqh RNAi	297.1	253.1	1.17384
																	osk/sqh RNAi	433.5	1168.8	0.370893	471.4	1367.2	0.344792	430.1	1476.1	0.291376	0.335687		osk/sqh RNAi	417.2	273.1	1.52765
																	osk/sqh RNAi	889	1782.7	0.498682	546	816	0.669118	468.6	1698.9	0.275826	0.481208		osk/sqh RNAi	355.5	282.3	1.2593
																	osk/sqh RNAi	337.7	681.7	0.495379	407.7	320.2	1.27327	292	138	2.11594	1.29486		osk/sqh RNAi	542	158.4	3.42172
																	osk/sqh RNAi	748.3	864.7	0.865387	449.5	1246.7	0.360552	496.1	1431.5	0.34656	0.524166		osk/sqh RNAi	530.2	435.7	1.21689
																	osk/sqh RNAi	550.7	1030.4	0.534453	563	1005	0.560199	521.4	541	0.963771	0.686141		osk/sqh RNAi	480.8	268.3	1.79202
																	osk/sqh RNAi	313.6	1091.8	0.287232	295	473.4	0.623152	269.1	749.1	0.359231	0.423205		osk/sqh RNAi	205.3	177.8	1.15467
																	osk/sqh RNAi	147	1057	0.139073	145.4	459.2	0.316638	145.1	821.2	0.176693	0.210801		osk/sqh RNAi	118	92.1	1.28122
																	osk/sqh RNAi	526.8	847.1	0.621886	255.3	952.8	0.267947	188.4	514.2	0.366394	0.418743		osk/sqh RNAi	137.9	131.1	1.05187
																	osk/sqh RNAi	218.7	584.6	0.374102	904	770	1.17403	259.5	798.2	0.325106	0.624411		osk/sqh RNAi	269.2	163.3	1.6485
																	osk/sqh RNAi	187.1	886.4	0.211079	231.6	481.1	0.481397	285	644	0.442547	0.378341		osk/sqh RNAi	138.5	118.3	1.17075
																	osk/sqh RNAi	176.5	943.4	0.187089	253.6	1226.4	0.206784	383.5	910.2	0.421336	0.271736		osk/sqh RNAi	212	102.9	2.06025
																	osk/sqh RNAi	204.3	1786.8	0.114338	252.2	1129.2	0.223344	216.7	959	0.225965	0.187882		osk/sqh RNAi	203.1	112.1	1.81178
																	sn28/sn28; +/sqh RNAi	563.4	612	0.920588	891.4	1036.9	0.859678	565.8	620.5	0.911845	0.89737		sn28/sn28; +/sqh RNAi	433.3	356.7	1.21475
																	sn28/sn28; +/sqh RNAi	224.2	379.4	0.590933	347	482	0.719917	281.8	195	1.44513	0.918659		sn28/sn28; +/sqh RNAi	357.6	251.4	1.42243
																	sn28/sn28; +/sqh RNAi	190.2	486.1	0.391278	214.3	693.4	0.309057	184	344.6	0.533952	0.411429		sn28/sn28; +/sqh RNAi	148.5	66.8	2.22305
																	sn28/sn28; +/sqh RNAi	440.1	564.1	0.780181	954.8	814.9	1.17168	1096.3	973	1.12672	1.02619		sn28/sn28; +/sqh RNAi	174.6	72.7	2.40165
																	sn28/sn28; +/sqh RNAi	422.3	464.6	0.908954	480.4	305.7	1.57148	664.5	196.4	3.3834	1.95461		sn28/sn28; +/sqh RNAi	301.3	191.8	1.57091
																	sn28/sn28; osk/+	381.4	2164.4	0.176215	572.7	427.3	1.34028	354.9	684.4	0.518556	0.678349		sn28/sn28; osk/+	334.3	307.4	1.08751
																	sn28/sn28; osk/+	460.4	532.5	0.864601	616.8	442.3	1.39453	433	643	0.673406	0.977512		sn28/sn28; osk/+	371.1	341.7	1.08604
																	sn28/sn28; osk/+	370.2	2057.7	0.17991	454.5	809.9	0.56118	497.1	690.9	0.719496	0.486862		sn28/sn28; osk/+	277.4	225.9	1.22798
																	sn28/sn28; osk/+	1299.4	1260.2	1.03111	1029.8	538	1.91413	1279.5	1257.9	1.01717	1.3208		sn28/sn28; osk/+	699.7	358.4	1.95229
																	sn28/sn28; osk/+	1745	1462.3	1.19333	2061.3	522.2	3.94734	2948.1	576.8	5.11113	3.41726		sn28/sn28; osk/+	323.3	229.8	1.40688
																	sn28/sn28; osk/+	4095	1044	3.92241	3501.5	1216.3	2.87881	3628.6	881.1	4.11826	3.63983		sn28/sn28; osk/+	1495	541.8	2.75932
																	sn28/sn28; osk/+	1648.5	787.7	2.0928	815.4	1104.3	0.738386	1620.8	803.2	2.01793	1.61637		sn28/sn28; osk/+	840.3	398.8	2.10707
																	sn28/sn28; osk/+	2107.9	1546.2	1.36328	1553.1	1419	1.0945	1570	982.6	1.5978	1.35186		sn28/sn28; osk/+	550	337.8	1.62818
																	sn28/sn28; osk/+	1029.4	483.8	2.12774	2148.4	548.9	3.91401	3257	914	3.56346	3.20174		sn28/sn28; osk/+	899.1	215.8	4.16636
																	sn28/sn28; osk/+	419.2	331.3	1.26532	732.1	689	1.06255	567.1	491.2	1.15452	1.1608		sn28/sn28; osk/+	403.9	116.8	3.45805
																	sn28/sn28; osk/+	2776	1682.7	1.64973	3218.2	703.5	4.57456	2040	1358.7	1.50144	2.57524		sn28/sn28; osk/+	804.8	274.6	2.93081
																	sn28/sn28; osk/+	1032	531	1.9435	816.1	492	1.65874	823.8	341.4	2.41301	2.00508		sn28/sn28; osk/+	865.6	392	2.20816
																	sn28/sn28; osk/+	180.1	714.1	0.252206	185.6	533.3	0.348022	302.5	531.1	0.569573	0.389933		sn28/sn28; osk/+	286.1	124.9	2.29063
																	sn28/sn28; osk/+	209	134.1	1.55854	303.1	173.4	1.74798	223	197	1.13198	1.4795		sn28/sn28; osk/+	433	213.3	2.03
																	sn28/sn28; osk/+	494	467	1.05782	515.2	429.8	1.1987	693.3	488.7	1.41866	1.22506		sn28/sn28; osk/+	370	250.2	1.47882
																	sn28/sn28; osk/+	142.4	412.5	0.345212	395.4	199.1	1.98594	646	137	4.71533	2.34883		sn28/sn28; osk/+	246	145.2	1.69421
																	sn28/sn28; osk/+	1793	631.7	2.83837	1288.6	890.6	1.44689	1245.5	689.2	1.80717	2.03081		sn28/sn28; osk/+	771.5	114.7	6.72624
																	sn28/sn28; osk/sqh RNAi	452.5	647.9	0.69841	625.6	760.3	0.822833	468.6	659.4	0.710646	0.743963		sn28/sn28; osk/sqh RNAi	999.9	481.4	2.07707
																	sn28/sn28; osk/sqh RNAi	205.4	293	0.701024	210.2	342.8	0.613186	163.2	251	0.650199	0.654803		sn28/sn28; osk/sqh RNAi	457.7	169.2	2.70508
																	sn28/sn28; osk/sqh RNAi	384.3	225	1.708	544	684	0.795322	439	648.3	0.677156	1.06016		sn28/sn28; osk/sqh RNAi	402.3	274.1	1.46771
																	sn28/sn28; osk/sqh RNAi	483	574.1	0.841317	437.7	283	1.54664	574	299.5	1.91653	1.43483		sn28/sn28; osk/sqh RNAi	585.5	259.6	2.25539
																	sn28/sn28; osk/sqh RNAi	180.8	928.6	0.194702	1808	1848.1	0.978302	370	776.5	0.476497	0.549834		sn28/sn28; osk/sqh RNAi	853.2	373.1	2.28679
																	sn28/sn28; osk/sqh RNAi	390.2	2039.4	0.191331	412.3	1893.9	0.217699	381.2	1600.3	0.238205	0.215745		sn28/sn28; osk/sqh RNAi	271.8	231.2	1.17561
																	sn28/sn28; osk/sqh RNAi	450.7	1202.1	0.374927	406	1084	0.374539	455	847	0.53719	0.428885		sn28/sn28; osk/sqh RNAi	367.8	271.1	1.35669
																	sn28/sn28; osk/sqh RNAi	785.3	631.5	1.24355	735	792	0.92803	747.2	774.5	0.964751	1.04544		sn28/sn28; osk/sqh RNAi	601.2	430.7	1.39587
																	sn28/sn28; osk/sqh RNAi	379.9	159.8	2.37735	457.4	684.9	0.667835	461.9	681.5	0.67777	1.24098		sn28/sn28; osk/sqh RNAi	294.2	226.2	1.30062
																	sn28/sn28; osk/sqh RNAi	460.7	395	1.16633	450.7	1002.4	0.449621	562.4	1367	0.411412	0.675787		sn28/sn28; osk/sqh RNAi	319.3	181.1	1.76311
																	sn28/sn28; osk/sqh RNAi	406	1088.9	0.372853	581.1	1337.7	0.434402	512.9	1037.4	0.494409	0.433888		sn28/sn28; osk/sqh RNAi	432	262.9	1.64321
																	sn28/sn28; osk/sqh RNAi	378	950.3	0.397769	449.6	1518.8	0.296023	627.5	1300	0.482692	0.392162		sn28/sn28; osk/sqh RNAi	286.1	275	1.04036
																	sn28/sn28; osk/sqh RNAi	480	1983.3	0.242021	518.3	1932	0.268271	610	2059	0.29626	0.268851		sn28/sn28; osk/sqh RNAi	367.5	198.9	1.84766
																	sn28/sn28; osk/sqh RNAi	572	1261	0.453608	584.3	2168	0.269511	518.7	1628.5	0.318514	0.347211		sn28/sn28; osk/sqh RNAi	352.8	148.4	2.37736
																	sn28/sn28; osk/sqh RNAi	371.2	523	0.709751	528.2	516	1.02364	745	478	1.55858	1.09732		sn28/sn28; osk/sqh RNAi	305.7	397.5	0.769057
																	sn28/sn28; osk/sqh RNAi	373	2748.5	0.13571	526.8	1885.1	0.279455	372.4	1234.2	0.301734	0.238966		sn28/sn28; osk/sqh RNAi	299.3	239.7	1.24864
																	sn28/sn28; osk/sqh RNAi	375.5	2318.3	0.161972	396.2	1912.4	0.207174	465	2520	0.184524	0.184557		sn28/sn28; osk/sqh RNAi	306.1	147.8	2.07104
																	sn28/sn28; osk/sqh RNAi	126.5	97.2	1.30144	149.5	189.9	0.787256	61.7	187.2	0.329594	0.806097		sn28/sn28; osk/sqh RNAi	301	159.7	1.88478
																	sn28/sn28; osk/sqh RNAi	547	1628	0.335995	489.5	952.9	0.513695	720.2	754.3	0.954793	0.601494		sn28/sn28; osk/sqh RNAi	571.3	192.8	2.96317
																	sn28/sn28; osk/sqh RNAi	199.5	1182.9	0.168653	244	811	0.300863	379.4	1457.9	0.260237	0.243251		sn28/sn28; osk/sqh RNAi	324.8	93.5	3.4738
																	sn28/sn28; osk/sqh RNAi	219.6	1598.4	0.137387	240.4	1509.6	0.159247	234.1	871.6	0.268587	0.188407		sn28/sn28; osk/sqh RNAi	239.6	174.2	1.37543
																	sn28/sn28; osk/sqh RNAi	214.7	1040.2	0.206403	210.7	690.2	0.305274	320.2	1000.1	0.320168	0.277281		sn28/sn28; osk/sqh RNAi	136.2	114.7	1.18745
																	sn28/sn28; osk/sqh RNAi	232.4	922.5	0.251924	372.3	1390.1	0.267822	247.3	1288.7	0.191899	0.237215		sn28/sn28; osk/sqh RNAi	352.2	75.3	4.67729
																	sn28/sn28; osk/sqh RNAi	177.3	1176	0.150765	164.9	1444.5	0.114157	184.5	720.4	0.256108	0.173677		sn28/sn28; osk/sqh RNAi	110.2	95.8	1.15031
																	sn28/sn28; osk/sqh RNAi	161	789.2	0.204004	205	1054	0.194497	526.6	2035.7	0.258683	0.219061		sn28/sn28; osk/sqh RNAi	274.6	101.8	2.69745
																	sn28/sn28; osk/sqh RNAi	219.1	1190.4	0.184056	233.6	958.4	0.24374	416.8	820.9	0.507735	0.311844		sn28/sn28; osk/sqh RNAi	239.8	114.1	2.10167
																	sn28/sn28; osk/sqh RNAi	247.2	846.2	0.29213	234.4	1096.3	0.21381	381.8	1147.6	0.332694	0.279545		sn28/sn28; osk/sqh RNAi	161.2	72.8	2.21429
																	sn28/sn28; osk/sqh RNAi	220	1344	0.16369	178.5	946	0.188689	233.6	1928.7	0.121118	0.157833		sn28/sn28; osk/sqh RNAi	114.7	93.2	1.23069
