# Supplementary material for: Fascin limits Myosin activity within Drosophila border cells to control substrate stiffness and promote migration
Source: eLife journal article supplement (doi:10.7554/elife.69836), 2021-10-25
Supplement: supp [file elife-69836-supp-v1.zip › elife_poa_e69836_Figure_4_source_data_1.xlsx]

## Sheet: Sheet1
G: Migration Index							H: Migration Index
genotype	border cells	follicle cells	follicle- BC	length	cluster		genotype	border cells	follicle cells	follicle- BC	length	cluster
yw control	162.7	122.1	1.33251	242.4	15.7		osk/+	70.7	78.2	0.904092	226.6	37.5
yw control	67.4	95.3	0.70724	253.5	36.7		osk/+	101.5	65.1	1.55914	176.1	28.1
yw control	118.3	90.97	1.30043	245.2	23.5		osk/+	85.3	57.3	1.48866	150.6	32.5
yw control	84.4	90.9	0.928493	249.2	32.7		osk/+	70.1	88.1	0.795687	206.1	24.4
yw control	107.1	89.3	1.19933	235.3	20.2		osk/+	22.2	50.1	0.443114	151.1	22.2
yw control	52.6	55.2	0.952899	222.6	31.4		osk/+	160.9	112.7	1.42768	238.3	35.3
yw control	36.6	52.7	0.694497	210.1	21.1		osk/+	143.5	104.9	1.36797	270.1	38.7
yw control	179.6	128.3	1.39984	269.7	23		osk/+	49.9	76.9	0.648895	212.1	19.9
yw control	85.4	65.1	1.31183	225.1	36.6		osk/+	89.9	96.4	0.932573	256.3	22
yw control	123.1	91.3	1.3483	232.8	25.4		osk/+	93.2	83.7	1.1135	230.4	29.2
yw control	22.4	30.9	0.724919	172.8	15.4		osk/+	58.3	44.6	1.30717	157.9	30.6
yw control	50.8	57.3	0.886562	207.8	15.4		osk/+	124.2	118.4	1.04899	250.3	44.6
yw control	33.8	48.2	0.701245	201.1	22.7		osk/+	63.4	65.1	0.973886	183.2	13.2
yw control	17.1	25.2	0.678571	173.9	15		osk/+	31.4	78.6	0.399491	213	23.8
yw control	33.8	46.3	0.730022	176.6	20.8		osk/+	26.1	51.2	0.509766	173.6	19.5
yw control	45.1	55.2	0.817029	201.8	16.8		osk/+	60.9	65.1	0.935484	192.2	23.4
yw control	60.6	47	1.28936	200.1	28.3		osk/+	115.1	127.2	0.904874	259.1	20.7
yw control	169.3	201.1	0.84187	323.1	29		osk/+	78.5	58.7	1.33731	186.5	24.3
yw control	121.3	114.4	1.06031	285.1	27.5		osk/+	26.3	48.6	0.541152	168	25.4
yw control	37.3	56.1	0.664884	219.7	20.8		osk/+	69.7	61.9	1.12601	193.7	22.2
yw control	38.1	45.2	0.84292	214.1	18.2		osk/+	63.1	67.5	0.934815	165.8	25.2
yw control	94.1	110.7	0.850045	235.3	29.1		osk/+	60	50.5	1.18812	155.9	19
yw control	110.9	123.7	0.896524	283.9	33.2		osk/+	102.2	91.5	1.11694	190.9	18.55
yw control	35.6	41.2	0.864078	202.7	18.1		osk/+	91.9	77.8	1.18123	214.6	24.1
yw control	59.1	72.1	0.819695	199.6	23		osk/+	22.1	61.9	0.357027	262.4	22.1
yw Y27632	26.2	37.6	0.696809	219.6	19.3		osk/+	60.7	110.3	0.550317	241.1	28.1
yw Y27632	45.5	68.7	0.6623	236.4	24.4		osk/+	34.6	52.5	0.659048	197.3	25.5
yw Y27632	19.5	55.1	0.353902	232.1	19.5		osk/+	34.9	44.2	0.789593	202.4	27.4
yw Y27632	110.5	65.5	1.68702	193.3	19.4		osk/+	55.3	62.3	0.88764	217.2	25.2
yw Y27632	34.9	66.1	0.527988	204.9	34.9		osk/+	46.7	59.1	0.790186	200.5	30.1
yw Y27632	169.8	115.4	1.4714	256.6	17.9		osk/+	89.5	59.3	1.50927	187.8	22.2
yw Y27632	74.1	83.2	0.890625	222.9	29.2		+/sqh RNAi	94.26	67.23	1.40205	222.81	39.83
yw Y27632	72.4	95.8	0.755741	249.1	30.9		+/sqh RNAi	137.9	103.9	1.32724	255.7	35.5
yw Y27632	17.5	61.5	0.284553	219.3	17.5		+/sqh RNAi	57.9	81.9	0.70696	221.7	24.8
yw Y27632	110.5	80.1	1.37953	236.2	28.9		+/sqh RNAi	51.8	83.1	0.623345	230.8	18.1
yw Y27632	16.2	73.4	0.220708	263.4	16.2		+/sqh RNAi	109.9	87	1.26322	211.5	28.2
yw Y27632	57.3	80.9	0.708282	219.7	43.6		+/sqh RNAi	20.1	38.3	0.524804	197.2	18.9
yw Y27632	31.3	77.1	0.405966	269.4	21.9		+/sqh RNAi	113.1	92.2	1.22668	222.3	26.7
yw Y27632	63.4	54.3	1.16759	203.7	25.4		+/sqh RNAi	32.3	50.2	0.643426	184.9	22.5
yw Y27632	109.5	95.7	1.1442	241.6	21		+/sqh RNAi	81	68.5	1.18248	204.2	26
yw Y27632	52.9	72.6	0.72865	226.5	29.9		+/sqh RNAi	127.1	111.3	1.14196	251.5	19.7
yw Y27632	55.9	49.4	1.13158	180.6	21.5		+/sqh RNAi	85.7	74.3	1.15343	191.6	25.2
yw Y27632	119.4	94.9	1.25817	220.7	37.7		+/sqh RNAi	92.1	106.2	0.867232	233.9	23.2
yw Y27632	37.1	80.9	0.458591	253.9	29.7		+/sqh RNAi	88.1	72	1.22361	214.2	25.3
yw Y27632	116.3	103.6	1.12259	242.1	14.9		+/sqh RNAi	107.7	92.3	1.16685	216.6	24.7
yw Y27632	137.9	114.3	1.20647	221.4	18		+/sqh RNAi	132.9	93.4	1.42291	223.9	12.2
yw Y27632	61.3	73.7	0.83175	225.1	24.7		+/sqh RNAi	49.3	74.5	0.661745	205.3	11.9
yw Y27632	88.8	82.5	1.07636	253.6	25.3		+/sqh RNAi	62.3	94.9	0.656481	253.3	19.7
yw Y27632	79.4	69.9	1.13591	246.1	26.1		+/sqh RNAi	105.9	87.6	1.2089	240.2	24.4
fascin-/- control	120	85.1	1.41011	233.2	11.5		+/sqh RNAi	131.1	72.8	1.80082	242.8	15.6
fascin-/- control	66	78.2	0.84399	252.2	24.6		+/sqh RNAi	19.4	53.6	0.36194	204.6	19.4
fascin-/- control	62.6	75.7	0.826948	218.6	22.4		+/sqh RNAi	110.1	79.3	1.3884	226.1	25.3
fascin-/- control	50.2	55.1	0.911071	181.8	19.3		+/sqh RNAi	54.6	43.2	1.26389	186.6	21
fascin-/- control	31.9	77.8	0.410026	238.9	22.9		+/sqh RNAi	116.4	99.8	1.16633	234.4	22.1
fascin-/- control	56.9	93	0.611828	307.9	28.8		+/sqh RNAi	104.6	91.4	1.14442	229.9	20.8
fascin-/- control	69.3	89.1	0.777778	241.2	34.6		+/sqh RNAi	123.8	112.9	1.09655	233.1	22.7
fascin-/- control	28.8	46.4	0.62069	185.5	14.9		+/sqh RNAi	48.6	62.9	0.772655	199.4	26.9
fascin-/- control	71.7	99.6	0.71988	247.4	32.2		+/sqh RNAi	47.2	52	0.907692	215.1	27.2
fascin-/- control	31.4	60.1	0.522463	227.4	20.8		osk/sqh RNAi	67.4	80.2	0.840399	219.5	16.2
fascin-/- control	77.7	108.6	0.71547	261.3	24.6		osk/sqh RNAi	108	66.7	1.61919	188.7	18.1
fascin-/- control	91.6	70.6	1.29745	210.4	15.6		osk/sqh RNAi	163.3	135	1.20963	263.6	34.5
fascin-/- control	97.7	101.5	0.962562	198.7	18.7		osk/sqh RNAi	131.1	104.7	1.25215	235.1	30.7
fascin-/- control	40.3	49.8	0.809237	176.2	17.5		osk/sqh RNAi	74.3	81.9	0.907204	200.7	26.6
fascin-/- control	55.5	59.9	0.926544	198.6	31		osk/sqh RNAi	97.3	89.2	1.09081	238.6	25.6
fascin-/- control	44.4	56.6	0.784452	167.2	19.6		osk/sqh RNAi	122.2	131.4	0.929985	261.4	25.2
fascin-/- control	76.3	103.3	0.738625	223.4	30.5		osk/sqh RNAi	69	91.2	0.756579	248.7	21.8
fascin-/- control	62.1	79.9	0.777222	201	20.9		osk/sqh RNAi	70.9	62.8	1.12898	200.8	15.7
fascin-/- control	59.7	109.3	0.546203	192.1	14.2		osk/sqh RNAi	70.6	77.9	0.90629	228.5	27.2
fascin-/- Y27632	31.9	51.7	0.617021	219.4	15.2		osk/sqh RNAi	87.7	69.5	1.26187	191.6	23.2
fascin-/- Y27633	120.5	106.2	1.13465	244.9	25.4		osk/sqh RNAi	83.1	68.6	1.21137	230.3	17.7
fascin-/- Y27634	31.8	50	0.636	202.1	22.4		osk/sqh RNAi	58.5	80.3	0.728518	209.3	22.5
fascin-/- Y27635	53.3	66	0.807576	205.1	36.2		osk/sqh RNAi	81.6	68.3	1.19473	208.5	23.7
fascin-/- Y27636	24.7	28.2	0.875887	218.3	17.4		osk/sqh RNAi	60.2	69.7	0.863702	230.8	23.1
fascin-/- Y27637	64.7	50	1.294	172.8	30.7		osk/sqh RNAi	62.1	46.5	1.33548	172.3	22
fascin-/- Y27638	140.4	84.1	1.66944	232.8	29.4		osk/sqh RNAi	80.3	90.6	0.886313	222.7	26.7
fascin-/- Y27639	26.4	41.5	0.636145	213.8	26.4		osk/sqh RNAi	94.2	104.5	0.901435	252.2	22.3
fascin-/- Y27640	45.4	43.1	1.05336	198.1	294		osk/sqh RNAi	93.5	99.9	0.935936	219.2	19.4
fascin-/- Y27641	96.5	41.4	2.33092	167.4	16.8		osk/sqh RNAi	49.9	59.1	0.844332	198.1	29.6
fascin-/- Y27642	42.6	49.9	0.853707	199	21.9		osk/sqh RNAi	70.8	104.7	0.676218	235.7	13
fascin-/- Y27643	77.4	43.7	1.77117	180.8	19		osk/sqh RNAi	60.6	70.4	0.860795	212.1	23.8
fascin-/- Y27644	85.9	93.4	0.9197	227.4	19.2		osk/sqh RNAi	68.1	79.7	0.854454	232.5	22.3
fascin-/- Y27645	40.6	78.1	0.519846	211.5	23.7		osk/sqh RNAi	26.9	68.2	0.394428	196.1	18.7
fascin-/- Y27646	118.4	85.3	1.38804	206.9	21.2		osk/sqh RNAi	39.4	62.2	0.633441	225.1	20.7
fascin-/- Y27647	54	57.3	0.942408	164.6	20		fascin-/-; +/sqh RNAi	28.2	60.7	0.46458	195.6	21.7
fascin-/- Y27648	89.3	50.9	1.75442	167.7	16.3		fascin-/-; +/sqh RNAi	85.1	96.9	0.878225	209.3	20.6
fascin-/- Y27649	39.4	47.6	0.827731	167	18.1		fascin-/-; +/sqh RNAi	71.5	100	0.715	186.7	22.7
fascin-/- Y27650	124.5	67.4	1.84718	186.8	17.7		fascin-/-; +/sqh RNAi	44.6	73.8	0.604336	172	17.5
fascin-/- Y27651	67.8	56	1.21071	180.4	13.2		fascin-/-; +/sqh RNAi	60.7	94.4	0.643008	196.9	21.2
fascin-/- Y27652	152.5	113.6	1.34243	252.6	19.2		fascin-/-; +/sqh RNAi	59.7	87.1	0.685419	203.3	20
fascin-/- Y27653	53.8	58.1	0.92599	174.3	14.7		fascin-/-; +/sqh RNAi	36.9	33.8	1.09172	145.1	19
fascin-/- Y27654	105.8	112.3	0.942119	254.4	19		fascin-/-; +/sqh RNAi	78	69.8	1.11748	191.9	15.2
fascin-/- Y27655	52.2	82.3	0.634265	214.3	19.8		fascin-/-; +/sqh RNAi	54.8	89.7	0.610925	222.6	19.6
fascin-/- Y27656	66.9	51.3	1.30409	178.5	22.8		fascin-/-; +/sqh RNAi	39.4	85.6	0.46028	231.5	25
fascin-/- Y27657	120.4	101.1	1.1909	224.2	18.8		fascin-/-; +/sqh RNAi	57.7	85.6	0.674065	202.4	24.7
fascin-/- Y27658	35.3	40.8	0.865196	141.3	14.4		fascin-/-; +/sqh RNAi	68.4	100.4	0.681275	236	20.7
fascin-/- Y27659	61.2	68.2	0.897361	185.2	20		fascin-/-; +/sqh RNAi	73.8	80.5	0.91677	224.8	27.1
fascin-/- Y27660	53.1	63.4	0.837539	210	19.5		fascin-/-; +/sqh RNAi	59.6	78.2	0.762148	227.9	24.3
fascin-/- Y27661	84.9	66.8	1.27096	189.2	27.2		fascin-/-; +/sqh RNAi	101.5	85.3	1.18992	197.3	18.5
fascin-/- Y27662	73.3	79.6	0.920854	197.4	19.8		fascin-/-; +/sqh RNAi	48.1	56.2	0.855872	173.1	28.1
fascin-/- Y27663	136.3	105.6	1.29072	224.1	26.9		fascin-/-; +/sqh RNAi	106.4	89.1	1.19416	232.8	31.4
fascin-/- Y27664	137.8	93.1	1.48013	202.5	14.4		fascin-/-; +/sqh RNAi	48.2	65.6	0.734756	195.8	22.4
							fascin-/-; osk/+	25.1	56.8	0.441901	171.1	18.5
							fascin-/-; osk/+	34.4	70.8	0.485876	197.6	20.5
							fascin-/-; osk/+	83.3	87.6	0.950913	196.8	25.6
							fascin-/-; osk/+	20.6	74.8	0.275401	206.5	20.6
							fascin-/-; osk/+	43.5	56.4	0.771277	185.3	20
							fascin-/-; osk/+	21.5	51.2	0.419922	210.5	19.8
							fascin-/-; osk/+	38.2	75	0.509333	217.2	21.2
							fascin-/-; osk/+	117.6	105.3	1.11681	236.2	16.5
							fascin-/-; osk/+	82.1	99.1	0.828456	232.4	16.9
							fascin-/-; osk/+	88.4	100.3	0.881356	233.1	19
							fascin-/-; osk/+	57.3	78.8	0.727157	239.9	20.9
							fascin-/-; osk/+	16	45.5	0.351648	191	16
							fascin-/-; osk/+	108.2	65.1	1.66206	221.7	17.5
							fascin-/-; osk/+	16.2	90.6	0.178808	243.3	16.2
							fascin-/-; osk/+	86.6	71	1.21972	233.9	18.8
							fascin-/-; osk/+	21.2	30	0.706667	167.4	18.1
							fascin-/-; osk/sqh RNAi	18.6	68.9	0.269956	206.2	16.4
							fascin-/-; osk/sqh RNAi	22.7	15.4	1.47403	184.6	51.6
							fascin-/-; osk/sqh RNAi	48.8	61.4	0.794788	171.2	27.7
							fascin-/-; osk/sqh RNAi	52.1	58.3	0.893654	180.1	20.4
							fascin-/-; osk/sqh RNAi	68.6	81.5	0.841718	218.4	17.9
							fascin-/-; osk/sqh RNAi	98.1	106.3	0.92286	233.9	28.2
							fascin-/-; osk/sqh RNAi	64.2	76.4	0.840314	185.1	21.8
							fascin-/-; osk/sqh RNAi	57.6	67.5	0.853333	197.7	16.8
							fascin-/-; osk/sqh RNAi	82.1	92.7	0.885653	216.5	18.9
							fascin-/-; osk/sqh RNAi	126.4	99.6	1.26908	231.5	26.8
							fascin-/-; osk/sqh RNAi	73	59.5	1.22689	168.2	16
							fascin-/-; osk/sqh RNAi	23.1	52.7	0.43833	200.2	15.6
							fascin-/-; osk/sqh RNAi	86.9	73	1.19041	212.8	16.6
							fascin-/-; osk/sqh RNAi	26.7	48	0.55625	182.9	22.1
							fascin-/-; osk/sqh RNAi	55.5	71.7	0.774059	194.3	19.5
							fascin-/-; osk/sqh RNAi	105.6	80	1.32	251.3	23.7
							fascin-/-; osk/sqh RNAi	115.3	98.8	1.167	248.2	27.6
							fascin-/-; osk/sqh RNAi	15.2	65.9	0.230653	223.5	13.8
							fascin-/-; osk/sqh RNAi	97.3	113.8	0.855009	263.7	24.7
							fascin-/-; osk/sqh RNAi	99.1	79	1.25443	203.6	24.8
							fascin-/-; osk/sqh RNAi	69.2	88.2	0.78458	216.8	15.4
							fascin-/-; osk/sqh RNAi	144.5	125	1.156	271.5	26.7
							fascin-/-; osk/sqh RNAi	101.9	105	0.970476	225.3	31.6
							fascin-/-; osk/sqh RNAi	95.7	123.8	0.773021	263.5	18.5
							fascin-/-; osk/sqh RNAi	32.6	50.7	0.642998	187.6	23
							fascin-/-; osk/sqh RNAi	56.6	65.5	0.864122	229.3	21.2
							fascin-/-; osk/sqh RNAi	120.8	98.4	1.22764	248.9	32.3
							fascin-/-; osk/sqh RNAi	86.6	77.2	1.12176	193.1	31.3
