# Supplementary material for: Fascin limits Myosin activity within Drosophila border cells to control substrate stiffness and promote migration
Source: eLife journal article supplement (doi:10.7554/elife.69836), 2021-10-25
Supplement: supp [file elife-69836-supp-v1.zip › elife_poa_e69836_Figure_5_figure_supplement_1_source_data_1.xlsx]

## Sheet: Sheet1
C: Migration Index
genotype	border cells	follicle cells	follicle- BC	length	cluster
Actin G4/+	21	72.3	0.290456	214.9	29.6
Actin G4/+	135.7	120.1	1.12989	290.9	35.1
Actin G4/+	117.5	105.2	1.11692	226.9	33.1
Actin G4/+	101.4	109.4	0.926874	236.6	29.4
Actin G4/+	114.1	125.1	0.91207	237.2	22.2
Actin G4/+	182	177.1	1.02767	306	44.2
Actin G4/+	25.6	64.3	0.398134	198.2	24.4
Actin G4/+	24.1	37.7	0.639257	174.6	25.4
Actin G4/+	125.9	108.6	1.1593	246.8	27
Actin G4/+	83.5	66	1.26515	211.5	33.8
Actin G4/+	150.3	113.4	1.3254	255.1	24.1
Actin G4/+	121.2	109.1	1.11091	238.7	29.4
Actin G4/+	22.1	57	0.387719	166.7	22.1
Actin G4/+	60.9	69.1	0.881331	211.3	23.1
Actin G4/+	30.2	62.7	0.481659	218.2	23.1
Actin G4/+	132.8	106.5	1.24695	258	33.9
Actin G4/+	109.4	94.5	1.15767	257.6	29.4
Actin G4/+	111.9	75.3	1.48606	206.6	32.5
Actin G4/+	123.3	98.1	1.25688	236.1	29.2
Actin G4/+	120.2	106.8	1.12547	217.4	36.7
Actin G4/+	56.1	41.8	1.34211	205.1	20.1
Actin G4/+	103.3	86.9	1.18872	216.8	20.6
Actin G4/+	42.5	58.4	0.72774	207.7	27.5
Actin G4/+	66.7	52.1	1.28023	191.6	26.9
Actin G4/+	31.7	47.6	0.665966	197.7	30.6
Actin G4/+	81.1	63.9	1.26917	196.8	31.6
Actin G4/+	74.1	64.6	1.14706	201.6	28.7
Actin G4/+	108.2	56.4	1.91844	194.2	26.5
Actin G4/+	83.3	96.3	0.865005	239.6	29.3
Actin G4/+	20.3	54.9	0.369763	154.4	19.3
Actin G4/+	95.7	68.3	1.40117	225.5	31.5
Actin G4/+	114.9	86.4	1.32986	231.3	35.5
Actin G4/+	142	117.6	1.20748	259.5	33.7
Actin G4/+	124.7	91.4	1.36433	219.9	30.5
Actin G4/+	122.3	96.1	1.27263	232.3	25.1
Actin G4/+	141.4	97.1	1.45623	234	43.9
Actin G4/+	80.6	59.1	1.36379	198.8	33.3
Actin G4/+	92.4	72.2	1.27978	216.3	27.4
Actin G4/+	98.2	73.7	1.33243	195.7	27.4
Actin G4/UAS GFP-Fascin	88.8	68.6	1.29446	224.6	24.2
Actin G4/UAS GFP-Fascin	79.7	70.8	1.12571	211.9	27.6
Actin G4/UAS GFP-Fascin	89.4	70.6	1.26629	186.6	30.1
Actin G4/UAS GFP-Fascin	99.7	81.8	1.21883	221.9	32.1
Actin G4/UAS GFP-Fascin	107.4	70.8	1.51695	205.4	25.9
Actin G4/UAS GFP-Fascin	104.9	87.6	1.19749	221.2	30.1
Actin G4/UAS GFP-Fascin	20.9	37.5	0.557333	167.8	18.1
Actin G4/UAS GFP-Fascin	133.4	97.8	1.36401	227.5	31.25
Actin G4/UAS GFP-Fascin	119.4	95.7	1.24765	236.6	26.9
Actin G4/UAS GFP-Fascin	103.9	74.7	1.3909	202.2	25.4
Actin G4/UAS GFP-Fascin	130.1	76.2	1.70735	211.1	25.9
Actin G4/UAS GFP-Fascin	28.1	39.1	0.71867	189.5	19.4
Actin G4/UAS GFP-Fascin	63.7	49.7	1.28169	197.8	32.8
Actin G4/UAS GFP-Fascin	143.1	116.4	1.22938	235.9	20.6
Actin G4/UAS GFP-Fascin	42.6	76.1	0.55979	240.2	11.9
Actin G4/UAS GFP-Fascin S52E	101.6	128.1	0.79313	252.4	38
Actin G4/UAS GFP-Fascin S52E	39.9	53.7	0.743017	198	31
Actin G4/UAS GFP-Fascin S52E	52.1	87.5	0.595429	242.6	30.1
Actin G4/UAS GFP-Fascin S52E	131.8	116.5	1.13133	252.1	34
Actin G4/UAS GFP-Fascin S52E	186.4	97.6	1.90984	250.7	28.4
Actin G4/UAS GFP-Fascin S52E	99.7	88.8	1.12275	241.3	33.5
Actin G4/UAS GFP-Fascin S52E	45.1	67.4	0.669139	200.7	23.3
Actin G4/UAS GFP-Fascin S52E	117.8	98.8	1.19231	223.2	28.3
Actin G4/UAS GFP-Fascin S52E	36.6	67.9	0.539028	189	24.2
Actin G4/UAS GFP-Fascin S52E	106.5	87	1.22414	214.8	23.5
Actin G4/UAS GFP-Fascin S52E	72.3	78.7	0.918679	215.5	24.8
Actin G4/UAS GFP-Fascin S52E	126.1	109.3	1.15371	239.5	29.3
Actin G4/UAS GFP-Fascin S52E	78.1	67.3	1.16048	218.2	24.2
Actin G4/UAS GFP-Fascin S52E	61.3	72.4	0.846685	197.3	25
fascin-/-; +/UAS GFP-Fascin	24.1	70.4	0.34233	169.6	19.1
fascin-/-; +/UAS GFP-Fascin	62.2	85.6	0.726636	203.4	25.7
fascin-/-; +/UAS GFP-Fascin	81.9	96.1	0.852237	201.9	30.4
fascin-/-; +/UAS GFP-Fascin	65.4	49.4	1.32389	153.4	20.2
fascin-/-; +/UAS GFP-Fascin	22.7	56.4	0.402482	166.4	21.7
fascin-/-; +/UAS GFP-Fascin	38.9	46.2	0.841991	160.8	15.7
fascin-/-; +/UAS GFP-Fascin	15.7	38.7	0.405685	172.1	11.6
fascin-/-; +/UAS GFP-Fascin S52E	37.5	76.9	0.487646	207.7	15.6
fascin-/-; +/UAS GFP-Fascin S52E	73.4	78.9	0.930292	209.1	22.3
fascin-/-; +/UAS GFP-Fascin S52E	64.3	52.7	1.22011	185.4	21.4
fascin-/-; +/UAS GFP-Fascin S52E	71.7	56.7	1.26455	162	23.9
fascin-/-; +/UAS GFP-Fascin S52E	85.5	75	1.14	163.3	19.4
fascin-/-; +/UAS GFP-Fascin S52E	52.5	68.4	0.767544	181.1	19.7
fascin-/-; +/UAS GFP-Fascin S52E	16.7	75.1	0.22237	190.8	16.7
fasin-/-; Actin G4/+	157.4	181.4	0.867696	293.7	22.2
fasin-/-; Actin G4/+	61.4	135.3	0.453806	307.3	22.7
fasin-/-; Actin G4/+	93.9	82.9	1.13269	197.6	25.1
fasin-/-; Actin G4/+	53.5	67.8	0.789086	205.1	22.6
fasin-/-; Actin G4/+	41.1	65.1	0.631336	202.1	17
fasin-/-; Actin G4/+	77	81.4	0.945946	208.7	23.9
fasin-/-; Actin G4/+	98.3	99.5	0.98794	222.5	22.5
fasin-/-; Actin G4/+	56.1	66.4	0.84488	210.5	30.1
fasin-/-; Actin G4/+	62.5	51.6	1.21124	191.7	19.7
fasin-/-; Actin G4/+	116.1	90.1	1.28857	183.2	25.9
fasin-/-; Actin G4/+	103.3	161.9	0.638048	243.4	15.7
fasin-/-; Actin G4/+	56.1	77.8	0.72108	187.8	17.3
fasin-/-; Actin G4/+	59.8	81.8	0.731051	182.7	21.7
fasin-/-; Actin G4/+	51.1	57.9	0.882556	193.9	15.9
fasin-/-; Actin G4/+	60.1	50.4	1.19246	162.8	18.2
fasin-/-; Actin G4/+	22.2	40.6	0.546798	146.1	22.2
fasin-/-; Actin G4/+	42.6	65.9	0.646434	151.1	15.5
fasin-/-; Actin G4/+	48.3	61.3	0.787928	176.2	19.4
fasin-/-; Actin G4/+	39.3	64.9	0.605547	188.9	11.4
fasin-/-; Actin G4/+	46.1	81.6	0.564951	191.1	17.3
fasin-/-; Actin G4/+	53.9	91.8	0.587146	156.2	22.1
fasin-/-; Actin G4/+	50.2	107.6	0.466543	201.2	20.7
fasin-/-; Actin G4/+	65.4	76.9	0.850455	165.6	27.2
fasin-/-; Actin G4/+	69.8	83.2	0.838942	181.7	19.1
fasin-/-; Actin G4/UAS GFP-Fascin	85.7	52.6	1.62928	186.7	26.9
fasin-/-; Actin G4/UAS GFP-Fascin	105.4	61.2	1.72222	193.9	24.5
fasin-/-; Actin G4/UAS GFP-Fascin	55.6	48.9	1.13701	178.9	19.3
fasin-/-; Actin G4/UAS GFP-Fascin	84.3	122.8	0.686482	190.9	19.6
fasin-/-; Actin G4/UAS GFP-Fascin	143.3	195.6	0.732618	237.5	28.8
fasin-/-; Actin G4/UAS GFP-Fascin	120.5	98.1	1.22834	31.3	259.5
fasin-/-; Actin G4/UAS GFP-Fascin	116.3	93.4	1.24518	219.6	28.9
fasin-/-; Actin G4/UAS GFP-Fascin	87.5	81.9	1.06838	213.1	21.3
fasin-/-; Actin G4/UAS GFP-Fascin	39.3	30.9	1.27184	147.1	24.8
fasin-/-; Actin G4/UAS GFP-Fascin	99.4	77.5	1.28258	230.6	25.8
fasin-/-; Actin G4/UAS GFP-Fascin	76.6	66.3	1.15535	207.7	27.2
fasin-/-; Actin G4/UAS GFP-Fascin	100.3	75.3	1.33201	206.1	20.9
fasin-/-; Actin G4/UAS GFP-Fascin	68.8	46.1	1.49241	175.1	26.5
fasin-/-; Actin G4/UAS GFP-Fascin	75.6	48.2	1.56846	176.1	24.2
fasin-/-; Actin G4/UAS GFP-Fascin	107.5	65	1.65385	185.6	16.5
fasin-/-; Actin G4/UAS GFP-Fascin	53.9	24.8	2.17339	145.3	21.5
fasin-/-; Actin G4/UAS GFP-Fascin	19.3	50.4	0.382937	183.8	18.7
fasin-/-; Actin G4/UAS GFP-Fascin	95.4	81.5	1.17055	221.4	21
fasin-/-; Actin G4/UAS GFP-Fascin	93.4	70.3	1.32859	208.4	25.7
fasin-/-; Actin G4/UAS GFP-Fascin	56.7	49.4	1.14777	211.8	26.9
fasin-/-; Actin G4/UAS GFP-Fascin	90.6	80	1.1325	218.8	29.3
fasin-/-; Actin G4/UAS GFP-Fascin	71.1	57.3	1.24084	175.2	23.5
fasin-/-; Actin G4/UAS GFP-Fascin	145.9	120.9	1.20678	257.6	15
fasin-/-; Actin G4/UAS GFP-Fascin	80.5	110.6	0.727848	241.5	31.1
fasin-/-; Actin G4/UAS GFP-Fascin	111.9	86.3	1.29664	200.7	17.5
fasin-/-; Actin G4/UAS GFP-Fascin	75.9	43.5	1.74483	149.4	14.3
fasin-/-; Actin G4/UAS GFP-Fascin	117.3	93.6	1.25321	226.7	33.1
fasin-/-; Actin G4/UAS GFP-Fascin	91.9	135.1	0.680237	220.7	22.5
fasin-/-; Actin G4/UAS GFP-Fascin	90.5	92.8	0.975216	206.1	24.3
fasin-/-; Actin G4/UAS GFP-Fascin	90.8	108.9	0.833792	206.3	20.6
fasin-/-; Actin G4/UAS GFP-Fascin	80.3	53.2	1.5094	179.1	24.9
fasin-/-; Actin G4/UAS GFP-Fascin	77.2	68.1	1.13363	197.8	23.7
fasin-/-; Actin G4/UAS GFP-Fascin	28.3	48.3	0.585921	166.6	17
fasin-/-; Actin G4/UAS GFP-Fascin	124.2	129.7	0.957594	259.4	22.7
fasin-/-; Actin G4/UAS GFP-Fascin	69	95.7	0.721003	205.6	19.3
fasin-/-; Actin G4/UAS GFP-Fascin	46.3	67.5	0.685926	218.8	21.3
fasin-/-; Actin G4/UAS GFP-Fascin S52E	89.4	148.6	0.601615	216.8	15.6
fasin-/-; Actin G4/UAS GFP-Fascin S52E	66	66.1	0.998487	173.8	27.6
fasin-/-; Actin G4/UAS GFP-Fascin S52E	77.1	118.8	0.64899	183.3	16.6
fasin-/-; Actin G4/UAS GFP-Fascin S52E	54.8	77.9	0.703466	209.1	23.7
fasin-/-; Actin G4/UAS GFP-Fascin S52E	93.1	92.4	1.00758	220	19.8
fasin-/-; Actin G4/UAS GFP-Fascin S52E	120.1	110.3	1.08885	220.4	31.3
fasin-/-; Actin G4/UAS GFP-Fascin S52E	80.1	94.5	0.847619	243.5	36.6
fasin-/-; Actin G4/UAS GFP-Fascin S52E	99.2	101.9	0.973503	195.6	19.4
fasin-/-; Actin G4/UAS GFP-Fascin S52E	86.9	77.2	1.12565	205.2	18.6
fasin-/-; Actin G4/UAS GFP-Fascin S52E	151.8	93.7	1.62006	232.4	17.8
fasin-/-; Actin G4/UAS GFP-Fascin S52E	69.3	55.1	1.25771	185.8	19.4
fasin-/-; Actin G4/UAS GFP-Fascin S52E	77.8	110.3	0.705349	214.3	25
fasin-/-; Actin G4/UAS GFP-Fascin S52E	99.5	114.6	0.868237	211.6	30
fasin-/-; Actin G4/UAS GFP-Fascin S52E	137.3	141.6	0.969633	229.1	15.2
fasin-/-; Actin G4/UAS GFP-Fascin S52E	63.3	108.7	0.582337	172.1	27.5
fasin-/-; Actin G4/UAS GFP-Fascin S52E	83.7	91.8	0.911765	200.8	26
fasin-/-; Actin G4/UAS GFP-Fascin S52E	83.7	96.2	0.870062	224	23.7
fasin-/-; Actin G4/UAS GFP-Fascin S52E	71.9	84	0.855952	190.3	14.4
fasin-/-; Actin G4/UAS GFP-Fascin S52E	66.3	85.5	0.775439	210.1	23.7
fasin-/-; Actin G4/UAS GFP-Fascin S52E	14.8	84.4	0.175355	196.2	14.8
fasin-/-; Actin G4/UAS GFP-Fascin S52E	126.9	95.7	1.32602	209.4	13.1
fasin-/-; Actin G4/UAS GFP-Fascin S52E	109.4	69.5	1.5741	175.8	16.1
fasin-/-; Actin G4/UAS GFP-Fascin S52E	20.5	54.1	0.378928	156.3	13.2
fasin-/-; Actin G4/UAS GFP-Fascin S52E	63.4	44.8	1.41518	192.2	20.4
fasin-/-; Actin G4/UAS GFP-Fascin S52E	55.1	89.1	0.618406	204.9	21.2
fasin-/-; Actin G4/UAS GFP-Fascin S52E	43	60.5	0.710744	171.7	21
