# Supplementary material for: Fascin limits Myosin activity within Drosophila border cells to control substrate stiffness and promote migration
Source: eLife journal article supplement (doi:10.7554/elife.69836), 2021-10-25
Supplement: supp [file elife-69836-supp-v1.zip › elife_poa_e69836_Figure_5_source_data_1.xlsx]

## Sheet: Sheet1
D: Nurse cell pMRLC quan												E: Border cell pMRLC quan
genotype	psqh 1	actin 1	average 1	psqh 2	actin 2	average 2	psqh 3	actin 3	average 3	average total		genotype	Mean pixel intensity of cluster	Mean pixel intensity of background	cluster/background
Actin G4/+	256.3	821.7	0.311914	288	924	0.311688	222.9	654.7	0.340461	0.321355		Actin G4/+	145.5	87.3	1.66667
Actin G4/+	672.7	956.2	0.703514	768.8	711.3	1.08084	540.8	488.6	1.10684	0.963729		Actin G4/+	505.6	341	1.4827
Actin G4/+	383	505.6	0.757516	397.5	561.7	0.707673	353.6	491.1	0.720016	0.728402		Actin G4/+	317.1	200.6	1.58076
Actin G4/+	403.7	1172	0.344454	358	550.3	0.650554	724.8	1936.8	0.374226	0.456411		Actin G4/+	264.2	209.4	1.2617
Actin G4/+	2346	3835.1	0.611718	729.1	1643.6	0.443599	406.1	1067	0.3806	0.478639		Actin G4/+	549.1	422.4	1.29995
Actin G4/+	759.9	3249.9	0.233823	861.7	1772.3	0.486204	1006.8	3648.6	0.275941	0.331989		Actin G4/+	522.4	404.2	1.29243
Actin G4/+	355.1	505.7	0.702195	298.3	568.5	0.524714	340.5	736.7	0.462196	0.563035		Actin G4/+	591.5	487.7	1.21284
Actin G4/+	445.1	270.9	1.64304	615.7	232	2.65388	567.8	227.6	2.49473	2.26388		Actin G4/+	573.3	463.7	1.23636
Actin G4/+	347.7	1881.3	0.184819	401.3	866.6	0.463074	483.1	1410.5	0.342503	0.330132		Actin G4/+	108.9	166.8	0.652878
Actin G4/+	1146.8	539.1	2.12725	351.6	772.2	0.455322	216.5	565.3	0.382982	0.988518		Actin G4/+	238.8	145.7	1.63898
Actin G4/+	429.1	1825.3	0.235085	752.2	2022.4	0.371934	308.7	882.5	0.349802	0.31894		Actin G4/+	474.8	194.6	2.43988
Actin G4/+	290.2	811.7	0.357521	548.1	511.2	1.07218	292.2	244.7	1.19412	0.874607		Actin G4/+	212.9	219.2	0.971259
Actin G4/+	279.5	338.4	0.825946	276.6	325.4	0.850031	244.3	367.5	0.664762	0.780246		Actin G4/+	168.1	167.6	1.00298
Actin G4/+	961.5	227.8	4.22081	567	240.8	2.35465	568.5	287.4	1.97808	2.85118		Actin G4/+	600.1	304.6	1.97012
Actin G4/+	666.1	587.6	1.13359	461.4	415.4	1.11074	745.2	759.4	0.981301	1.07521		Actin G4/+	389.7	292.5	1.33231
Actin G4/+	348	172.2	2.02091	317.9	467.9	0.679419	391.9	274.4	1.42821	1.37618		Actin G4/+	296.1	180.1	1.64409
Actin G4/+	1870.2	1362.6	1.37252	732	413.2	1.77154	764.7	494.7	1.54579	1.56328		Actin G4/+	1041.9	594.6	1.75227
Actin G4/+	1169.3	612.5	1.90906	1007.5	611.1	1.64867	823.3	489.5	1.68192	1.74655		Actin G4/+	764.3	547.4	1.39624
Actin G4/+	905.1	896.7	1.00937	860.1	851.8	1.00974	734.6	553.9	1.32623	1.11511		Actin G4/+	735.8	471.9	1.55923
Actin G4/+	850	774.8	1.09706	1113.9	717.1	1.55334	737.1	514.1	1.43377	1.36139		Actin G4/+	998.1	521.8	1.9128
Actin G4/+	841.9	841.1	1.00095	2295.1	930.9	2.46546	849.8	409.4	2.07572	1.84738		Actin G4/+	989.2	730.1	1.35488
Actin G4/+	953.8	1142.5	0.834836	748.6	721.2	1.03799	1030.9	766.1	1.34565	1.07282		Actin G4/+	820.5	537.8	1.52566
Actin G4/+	669.8	534.1	1.25407	1513.3	1099.5	1.37635	920.3	630.1	1.46056	1.36366		Actin G4/+	629.7	347.5	1.81209
Actin G4/+	990.8	610.3	1.62346	754.5	736.8	1.02402	860.1	855.9	1.00491	1.21746		Actin G4/+	688.8	598.6	1.15068
Actin G4/UAS GFP-Fascin	1003.3	939.6	1.06779	1368.5	3154.5	0.433825	1667.2	1012.7	1.64629	1.0493		Actin G4/UAS GFP-Fascin	591.1	394.3	1.49911
Actin G4/UAS GFP-Fascin	1918.7	416.7	4.60451	791.9	987.5	0.801924	1185.4	1408.5	0.841605	2.08268		Actin G4/UAS GFP-Fascin	586.1	419	1.39881
Actin G4/UAS GFP-Fascin	386.1	809.2	0.477138	546.7	1201.1	0.455166	429.9	621.1	0.692159	0.541488		Actin G4/UAS GFP-Fascin	359.3	181.3	1.9818
Actin G4/UAS GFP-Fascin	149.1	343.2	0.434441	291	233.2	1.24786	225.5	262.9	0.857741	0.846679		Actin G4/UAS GFP-Fascin	369.6	158.4	2.33333
Actin G4/UAS GFP-Fascin	420	289	1.45329	436.5	145	3.01034	383.5	286.7	1.33764	1.93376		Actin G4/UAS GFP-Fascin	336.5	191.6	1.75626
Actin G4/UAS GFP-Fascin	257.6	679.5	0.379102	319.4	737	0.433379	374.1	669	0.559193	0.457225		Actin G4/UAS GFP-Fascin	250.2	207.5	1.20578
Actin G4/UAS GFP-Fascin	271	563.5	0.480923	481.9	399.8	1.20535	577.8	665	0.868872	0.851716		Actin G4/UAS GFP-Fascin	301	270.4	1.11317
Actin G4/UAS GFP-Fascin	547.9	679.2	0.806684	802	789	1.01648	1060	1347.2	0.786817	0.869993		Actin G4/UAS GFP-Fascin	266	222	1.1982
Actin G4/UAS GFP-Fascin	359.2	297.2	1.20861	711.7	492.5	1.44508	404.8	790.9	0.511822	1.05517		Actin G4/UAS GFP-Fascin	443.1	111.9	3.95979
Actin G4/UAS GFP-Fascin	407.9	1077.5	0.378561	372.8	790.4	0.47166	186.6	1050.2	0.17768	0.342634		Actin G4/UAS GFP-Fascin	282.4	80	3.53
Actin G4/UAS GFP-Fascin	571.7	1605.9	0.356	868.9	350.5	2.47903	702	1503	0.467066	1.1007		Actin G4/UAS GFP-Fascin	458.1	374.6	1.2229
Actin G4/UAS GFP-Fascin	696.2	856.2	0.813128	683.2	1604.4	0.425829	1144.8	924.6	1.23816	0.825705		Actin G4/UAS GFP-Fascin	428.6	411.3	1.04206
Actin G4/UAS GFP-Fascin	1329.1	1355.9	0.980235	1216	681	1.78561	1603.4	845.6	1.89617	1.554		Actin G4/UAS GFP-Fascin	584.1	344.3	1.69649
Actin G4/UAS GFP-Fascin	538.8	881.2	0.611439	525.6	617.2	0.851588	629.1	730	0.861781	0.774936		Actin G4/UAS GFP-Fascin	732.7	190.4	3.84821
Actin G4/UAS GFP-Fascin	1126.1	1461.1	0.770721	420.8	1413.5	0.297701	1727.9	754.1	2.29134	1.11992		Actin G4/UAS GFP-Fascin	381.5	238.2	1.6016
Actin G4/UAS GFP-Fascin	454.1	671.6	0.676147	335.8	697.5	0.481434	476.7	731.1	0.652031	0.603204		Actin G4/UAS GFP-Fascin	482.9	176.8	2.73133
Actin G4/UAS GFP-Fascin	757.9	573.7	1.32107	487.7	612.5	0.796245	613	485	1.26392	1.12708		Actin G4/UAS GFP-Fascin	361.2	178.2	2.02694
Actin G4/UAS GFP-Fascin	1637.3	1443.2	1.13449	1597.6	1546.6	1.03298	670.1	920.1	0.72829	0.965253		Actin G4/UAS GFP-Fascin	412.1	299.8	1.37458
Actin G4/UAS GFP-Fascin	1316.1	1031.4	1.27603	1159	1635.5	0.708652	1128.6	628.1	1.79685	1.26051		Actin G4/UAS GFP-Fascin	408.1	287.4	1.41997
Actin G4/UAS GFP-Fascin	799.1	229.4	3.48344	267.8	416.5	0.642977	369.3	125.8	2.93561	2.35401		Actin G4/UAS GFP-Fascin	326.1	194.1	1.68006
Actin G4/UAS GFP-Fascin	401.6	247.1	1.62525	306.9	357.8	0.857742	795	1340.5	0.593062	1.02535		Actin G4/UAS GFP-Fascin	280.5	239.9	1.16924
Actin G4/UAS GFP-Fascin	1523.5	508	2.99902	866	794.1	1.09054	1029.2	785	1.31108	1.80021		Actin G4/UAS GFP-Fascin	976.7	490.2	1.99245
Actin G4/UAS GFP-Fascin	1803.9	1877.9	0.960594	965.5	1357.3	0.711339	1095.1	1515.4	0.722647	0.798193		Actin G4/UAS GFP-Fascin	922.6	711.1	1.29743
Actin G4/UAS GFP-Fascin	824.3	628.2	1.31216	704.1	1028	0.684922	736.9	676.2	1.08977	1.02895		Actin G4/UAS GFP-Fascin	923.9	439.1	2.10408
Actin G4/UAS GFP-Fascin	1304.8	1661.5	0.785314	964.2	928.3	1.03867	838.4	805.6	1.04071	0.954901		Actin G4/UAS GFP-Fascin	541	183.8	2.94342
Actin G4/UAS GFP-Fascin	581.8	1232.9	0.471896	620.2	578.3	1.07245	703.1	414.2	1.69749	1.08061		Actin G4/UAS GFP-Fascin	502.7	227.5	2.20967
Actin G4/UAS GFP-Fascin	826.8	910.8	0.907773	905.9	629.5	1.43908	970.6	447.4	2.16942	1.50543		Actin G4/UAS GFP-Fascin	771.1	440.5	1.75051
Actin G4/UAS GFP-Fascin	969.2	779.6	1.2432	957.8	427.4	2.24099	971.2	521.4	1.86268	1.78229		Actin G4/UAS GFP-Fascin	680.9	444.6	1.53149
Actin G4/UAS GFP-Fascin	799.2	1728.9	0.462259	1180.2	834.9	1.41358	949.4	436.9	2.17304	1.34963		Actin G4/UAS GFP-Fascin	765.4	539.1	1.41977
Actin G4/UAS GFP-Fascin S52E	540.6	721.1	0.749688	695.3	386.6	1.7985	513.8	426.6	1.20441	1.25086		Actin G4/UAS GFP-Fascin S52E	421.1	388.9	1.0828
Actin G4/UAS GFP-Fascin S52E	680	587	1.15843	1945.4	1426.6	1.36366	583.2	656	0.889024	1.13704		Actin G4/UAS GFP-Fascin S52E	771.5	500.2	1.54238
Actin G4/UAS GFP-Fascin S52E	669.4	637.4	1.0502	2594.7	950.3	2.7304	1364.2	521.9	2.61391	2.13151		Actin G4/UAS GFP-Fascin S52E	459	293.8	1.56229
Actin G4/UAS GFP-Fascin S52E	552	1104.5	0.499774	462.1	792.2	0.583312	541.4	898.4	0.602627	0.561904		Actin G4/UAS GFP-Fascin S52E	450.9	300.2	1.502
Actin G4/UAS GFP-Fascin S52E	462.4	500.6	0.923692	406.1	343	1.18397	714.1	711.9	1.00309	1.03692		Actin G4/UAS GFP-Fascin S52E	732.3	323.3	2.26508
Actin G4/UAS GFP-Fascin S52E	367.5	373.9	0.982883	325.4	492.5	0.660711	803	631.8	1.27097	0.971522		Actin G4/UAS GFP-Fascin S52E	378.6	106.1	3.56833
Actin G4/UAS GFP-Fascin S52E	1300.8	772.3	1.68432	535.4	392.9	1.36269	485	408.8	1.1864	1.41114		Actin G4/UAS GFP-Fascin S52E	780.4	333.3	2.34143
Actin G4/UAS GFP-Fascin S52E	676.1	919.6	0.735211	546.8	549	0.995993	389.1	895.3	0.434603	0.721936		Actin G4/UAS GFP-Fascin S52E	402.8	277.4	1.45205
Actin G4/UAS GFP-Fascin S52E	1084.5	502.7	2.15735	845.3	334.6	2.5263	831.7	522.8	1.59086	2.0915		Actin G4/UAS GFP-Fascin S52E	769.5	263.3	2.92252
Actin G4/UAS GFP-Fascin S52E	929.3	1489.9	0.623733	510.9	533.7	0.957279	442	423.3	1.04418	0.875063		Actin G4/UAS GFP-Fascin S52E	488	264.4	1.84569
Actin G4/UAS GFP-Fascin S52E	529.6	317	1.67066	609.6	616.7	0.988487	288.6	556.8	0.518319	1.05916		Actin G4/UAS GFP-Fascin S52E	282.3	191.5	1.47415
Actin G4/UAS GFP-Fascin S52E	354.7	454.9	0.779732	451.9	462.3	0.977504	244.5	448.7	0.544908	0.767381		Actin G4/UAS GFP-Fascin S52E	167.9	129.9	1.29253
Actin G4/UAS GFP-Fascin S52E	372.6	543.2	0.685935	310.7	417.6	0.744013	276	356.9	0.773326	0.734425		Actin G4/UAS GFP-Fascin S52E	143.4	106.2	1.35028
Actin G4/UAS GFP-Fascin S52E	384	1276	0.30094	398.1	1081.8	0.367998	962.1	282.2	3.40928	1.35941		Actin G4/UAS GFP-Fascin S52E	232.6	284.2	0.818438
Actin G4/UAS GFP-Fascin S52E	326	456	0.714912	444.1	197.1	2.25317	409.7	238.2	1.71998	1.56269		Actin G4/UAS GFP-Fascin S52E	402.7	269.4	1.4948
Actin G4/UAS GFP-Fascin S52E	293.3	251.1	1.16806	315	1010.4	0.311758	232.5	421	0.552257	0.677358		Actin G4/UAS GFP-Fascin S52E	240.3	180.1	1.33426
Actin G4/UAS GFP-Fascin S52E	322.5	557.4	0.578579	332.4	426.2	0.779916	247.1	541	0.456747	0.60508		Actin G4/UAS GFP-Fascin S52E	176.7	130.6	1.35299
Actin G4/UAS GFP-Fascin S52E	515.2	433.3	1.18901	442.5	453.2	0.97639	373.4	709.6	0.526212	0.897206		Actin G4/UAS GFP-Fascin S52E	215	217.3	0.989416
Actin G4/UAS GFP-Fascin S52E	233.7	515	0.453786	288.5	253.9	1.13627	293.1	446.7	0.656145	0.748735		Actin G4/UAS GFP-Fascin S52E	176.3	146.3	1.20506
Actin G4/UAS GFP-Fascin S52E	1647.5	2040.8	0.807281	1336.1	539.6	2.47609	1651.7	786.9	2.099	1.79412		Actin G4/UAS GFP-Fascin S52E	1617.8	1051.2	1.539
Actin G4/UAS GFP-Fascin S52E	876.7	1738.4	0.504314	647.1	439.5	1.47235	638.3	844.7	0.755653	0.910774		Actin G4/UAS GFP-Fascin S52E	555.2	475.5	1.16761
Actin G4/UAS GFP-Fascin S52E	951.5	1009.6	0.942452	899.5	870.8	1.03296	811	850.6	0.953445	0.976285		Actin G4/UAS GFP-Fascin S52E	776.7	586.3	1.32475
Actin G4/UAS GFP-Fascin S52E	2072.8	1667.1	1.24336	976.8	1189.4	0.821254	830.3	434.1	1.91269	1.32577		Actin G4/UAS GFP-Fascin S52E	700.1	530.5	1.3197
Actin G4/UAS GFP-Fascin S52E	1088.1	1211.5	0.898143	1067.6	645.6	1.65366	1413.1	778.2	1.81586	1.45589		Actin G4/UAS GFP-Fascin S52E	640.3	729.4	0.877845
Actin G4/UAS GFP-Fascin S52E	646.1	382.8	1.68783	847.7	1206.9	0.702378	604.2	434.1	1.39185	1.26068		Actin G4/UAS GFP-Fascin S52E	491.9	424.1	1.15987
fascin-/-; +/UAS GFP-Fascin	340	291.7	1.16558	378.1	207	1.82657	456	141.1	3.23175	2.07463		fascin-/-; +/UAS GFP-Fascin	383.4	131	2.92672
fascin-/-; +/UAS GFP-Fascin	470.3	380.5	1.23601	214.5	178.8	1.19966	269	500.4	0.53757	0.99108		fascin-/-; +/UAS GFP-Fascin	422.1	153.5	2.74984
fascin-/-; +/UAS GFP-Fascin	1101.9	988	1.11528	1527.6	1228	1.24397	3367.8	1356.4	2.4829	1.61405		fascin-/-; +/UAS GFP-Fascin	513.2	164.1	3.12736
fascin-/-; +/UAS GFP-Fascin	804.2	469.7	1.71216	533.4	1206.5	0.442105	992.6	475	2.08968	1.41465		fascin-/-; +/UAS GFP-Fascin	568.2	172.7	3.2901
fascin-/-; +/UAS GFP-Fascin	3292.9	3476.1	0.947297	2713.3	577.4	4.69917	2600	845	3.07692	2.9078		fascin-/-; +/UAS GFP-Fascin	1245.7	309.3	4.02748
fascin-/-; +/UAS GFP-Fascin	345.8	386.2	0.895391	264.9	434.7	0.609386	309.3	601.3	0.514385	0.673054		fascin-/-; +/UAS GFP-Fascin	429.6	219.6	1.95628
fascin-/-; +/UAS GFP-Fascin	334.8	149.3	2.24246	298.3	105.4	2.83017	317.3	130.5	2.43142	2.50135		fascin-/-; +/UAS GFP-Fascin	317.7	135.8	2.33947
fascin-/-; +/UAS GFP-Fascin	1144.1	584.3	1.95807	519.2	282.2	1.83983	543.2	290.3	1.87117	1.88969		fascin-/-; +/UAS GFP-Fascin	306.1	127.8	2.39515
fascin-/-; +/UAS GFP-Fascin	854	592	1.44257	665.5	498.1	1.33608	825.5	294.5	2.80306	1.86057		fascin-/-; +/UAS GFP-Fascin	291.1	83.7	3.4779
fascin-/-; +/UAS GFP-Fascin	1144.3	491.6	2.32771	359.8	274.8	1.30932	366.1	352.1	1.03976	1.55893		fascin-/-; +/UAS GFP-Fascin	456.9	213.7	2.13804
fascin-/-; +/UAS GFP-Fascin	1305.7	283.7	4.6024	1159.9	244	4.75369	1006.7	252	3.99484	4.45031		fascin-/-; +/UAS GFP-Fascin	377.8	104.3	3.62224
fascin-/-; +/UAS GFP-Fascin	872.7	347.5	2.51137	848.8	365.9	2.31976	1262.2	417.7	3.02179	2.61764		fascin-/-; +/UAS GFP-Fascin	1310.3	363.1	3.60865
fascin-/-; +/UAS GFP-Fascin	787.7	729.6	1.07963	1064.4	407.9	2.60946	855.4	608.1	1.40668	1.69859		fascin-/-; +/UAS GFP-Fascin	774.4	344.9	2.24529
fascin-/-; +/UAS GFP-Fascin	764.5	728.5	1.04942	1063.1	623.5	1.70505	853.8	580.2	1.47156	1.40868		fascin-/-; +/UAS GFP-Fascin	995.8	448.5	2.22029
fascin-/-; +/UAS GFP-Fascin	999.6	1446	0.691286	1018.3	1037.2	0.981778	2054.6	1285.4	1.59841	1.09049		fascin-/-; +/UAS GFP-Fascin	1109.3	402.4	2.75671
fascin-/-; +/UAS GFP-Fascin	1241.6	1178.8	1.05327	1081.3	479.3	2.256	717.1	793.9	0.903262	1.40418		fascin-/-; +/UAS GFP-Fascin	1248.4	576.8	2.16436
fascin-/-; +/UAS GFP-Fascin	830.9	345.9	2.40214	486.6	322.3	1.50977	596.2	348.3	1.71174	1.87455		fascin-/-; +/UAS GFP-Fascin	688	393	1.75064
fascin-/-; +/UAS GFP-Fascin	2891	572.4	5.05066	1137	432	2.63194	1180.1	356.5	3.31024	3.66428		fascin-/-; +/UAS GFP-Fascin	988.8	708.2	1.39622
fascin-/-; +/UAS GFP-Fascin S52E	712.8	372	1.91613	560	433.8	1.29092	1081.2	1412	0.765722	1.32426		fascin-/-; +/UAS GFP-Fascin S52E	442.1	194.2	2.27652
fascin-/-; +/UAS GFP-Fascin S52E	1398.6	1834.5	0.762388	3192.9	1130.2	2.82508	1018.6	371.9	2.73891	2.10879		fascin-/-; +/UAS GFP-Fascin S52E	635.5	281.9	2.25435
fascin-/-; +/UAS GFP-Fascin S52E	645.5	594.1	1.08652	1576.1	428.5	3.67818	1352.5	517.1	2.61555	2.46008		fascin-/-; +/UAS GFP-Fascin S52E	574.8	233.6	2.46062
fascin-/-; +/UAS GFP-Fascin S52E	462.9	370.6	1.24906	619.5	437.3	1.41665	806.2	538.9	1.49601	1.38724		fascin-/-; +/UAS GFP-Fascin S52E	949.9	358.7	2.64817
fascin-/-; +/UAS GFP-Fascin S52E	819.4	560.7	1.46139	475.7	474.8	1.0019	375.1	888.1	0.422362	0.961882		fascin-/-; +/UAS GFP-Fascin S52E	269.4	155.1	1.73694
fascin-/-; +/UAS GFP-Fascin S52E	717.5	535	1.34112	946.9	482.6	1.96208	518	902.5	0.573961	1.29239		fascin-/-; +/UAS GFP-Fascin S52E	309.6	153.7	2.01431
fascin-/-; +/UAS GFP-Fascin S52E	1320.5	636.8	2.07365	318	282.4	1.12606	604.7	259.7	2.32846	1.84272		fascin-/-; +/UAS GFP-Fascin S52E	341.3	219.5	1.5549
fascin-/-; +/UAS GFP-Fascin S52E	609.3	553.2	1.10141	545.4	456.8	1.19396	359.9	495.8	0.725898	1.00709		fascin-/-; +/UAS GFP-Fascin S52E	202.4	103.1	1.96314
fascin-/-; +/UAS GFP-Fascin S52E	1344.5	529.8	2.53775	1850.2	530.1	3.49028	306.1	315.7	0.969591	2.33254		fascin-/-; +/UAS GFP-Fascin S52E	302.6	122.2	2.47627
fascin-/-; +/UAS GFP-Fascin S52E	508	310	1.63871	523.3	319.7	1.63685	530	232.1	2.2835	1.85302		fascin-/-; +/UAS GFP-Fascin S52E	407.5	398.9	1.02156
fasin-/-; Actin G4/+	987	330.3	2.98819	636.6	568.3	1.12018	1331.4	448.6	2.9679	2.35876		fasin-/-; Actin G4/+	313.9	134.5	2.33383
fasin-/-; Actin G4/+	857.5	482.8	1.7761	965.8	463.9	2.08191	849.1	585.6	1.44997	1.76933		fasin-/-; Actin G4/+	624.3	229.6	2.71908
fasin-/-; Actin G4/+	515.4	883.1	0.583626	687.5	329	2.08967	686	302	2.27152	1.64827		fasin-/-; Actin G4/+	759.1	416.1	1.82432
fasin-/-; Actin G4/+	979	1542.8	0.634561	660.2	2627	0.251313	728.4	2323.5	0.313493	0.399789		fasin-/-; Actin G4/+	574.8	247.2	2.32524
fasin-/-; Actin G4/+	715	337.6	2.11789	855.1	615.2	1.38995	920.1	1232.3	0.746653	1.41817		fasin-/-; Actin G4/+	734.1	508.3	1.44423
fasin-/-; Actin G4/+	1894.6	1182.2	1.60261	642.7	1760.2	0.365129	639.4	945.7	0.676113	0.881282		fasin-/-; Actin G4/+	663.4	388.8	1.70628
fasin-/-; Actin G4/+	549.6	129.4	4.2473	588	722.8	0.813503	2948	2301	1.28118	2.11399		fasin-/-; Actin G4/+	485.1	270.5	1.79335
fasin-/-; Actin G4/+	806.3	498.7	1.6168	514.3	626.9	0.820386	838.7	656.1	1.27831	1.2385		fasin-/-; Actin G4/+	307.5	87.2	3.52638
fasin-/-; Actin G4/+	984.9	1762.5	0.558809	998.2	756	1.32037	1934.3	1500	1.28953	1.05624		fasin-/-; Actin G4/+	550.1	131.1	4.19603
fasin-/-; Actin G4/+	539.9	530.3	1.0181	436.8	691.4	0.631762	641.1	587.6	1.09105	0.913638		fasin-/-; Actin G4/+	234.4	134.4	1.74405
fasin-/-; Actin G4/+	887.1	949.7	0.934084	747.7	721.8	1.03588	768.1	908.5	0.84546	0.938476		fasin-/-; Actin G4/+	418.6	222.9	1.87797
fasin-/-; Actin G4/+	1515.5	674.8	2.24585	1882.4	374.8	5.02241	825	502	1.64343	2.97056		fasin-/-; Actin G4/+	535.4	437.9	1.22265
fasin-/-; Actin G4/+	393	413	0.951574	325.4	504.2	0.645379	401.4	363.3	1.10487	0.900608		fasin-/-; Actin G4/+	197.9	216.3	0.914933
fasin-/-; Actin G4/+	626.1	530.6	1.17998	419.7	399	1.05188	472	320.6	1.47224	1.2347		fasin-/-; Actin G4/+	300.2	287.3	1.0449
fasin-/-; Actin G4/UAS GFP-Fascin	357.2	1551.6	0.230214	957.3	1969.5	0.486062	306.7	826.2	0.371218	0.362498		fasin-/-; Actin G4/UAS GFP-Fascin	366.3	169.4	2.16234
fasin-/-; Actin G4/UAS GFP-Fascin	398.5	1389.5	0.286794	240.4	478.7	0.502193	193.6	440	0.44	0.409662		fasin-/-; Actin G4/UAS GFP-Fascin	204.4	153.9	1.32814
fasin-/-; Actin G4/UAS GFP-Fascin	677.2	2026	0.334255	544.8	2066.9	0.263583	456.3	1364.3	0.334457	0.310765		fasin-/-; Actin G4/UAS GFP-Fascin	437.1	208.5	2.0964
fasin-/-; Actin G4/UAS GFP-Fascin	232.1	1011.9	0.22937	215	948.5	0.226674	224.1	971	0.230793	0.228946		fasin-/-; Actin G4/UAS GFP-Fascin	180.6	137.4	1.31441
fasin-/-; Actin G4/UAS GFP-Fascin	205.6	761.1	0.270135	228.1	590.9	0.386021	255	660	0.386364	0.347507		fasin-/-; Actin G4/UAS GFP-Fascin	164.2	121.5	1.35144
fasin-/-; Actin G4/UAS GFP-Fascin	307.3	1151.4	0.266892	344.5	1198.9	0.287347	435.6	945.1	0.460904	0.338381		fasin-/-; Actin G4/UAS GFP-Fascin	442.6	167.1	2.64871
fasin-/-; Actin G4/UAS GFP-Fascin	459.4	2038.9	0.225318	334.5	2056.8	0.162631	431.1	1967.4	0.219122	0.202357		fasin-/-; Actin G4/UAS GFP-Fascin	300.2	183.5	1.63597
fasin-/-; Actin G4/UAS GFP-Fascin	894.1	2457.2	0.363869	761.6	2496.7	0.305043	727.4	1508.7	0.482137	0.383683		fasin-/-; Actin G4/UAS GFP-Fascin	590.7	618.1	0.955671
fasin-/-; Actin G4/UAS GFP-Fascin	464.2	949.3	0.488992	753.3	1335.3	0.564143	496.6	1237.6	0.401261	0.484798		fasin-/-; Actin G4/UAS GFP-Fascin	423.5	271.8	1.55813
fasin-/-; Actin G4/UAS GFP-Fascin	464.8	955.6	0.486396	453.6	2103	0.215692	492.1	821.6	0.598953	0.43368		fasin-/-; Actin G4/UAS GFP-Fascin	557.1	492.9	1.13025
fasin-/-; Actin G4/UAS GFP-Fascin	507.3	893.1	0.568021	546.5	671.1	0.814335	521.6	543.2	0.960236	0.780864		fasin-/-; Actin G4/UAS GFP-Fascin	238.8	188.2	1.26886
fasin-/-; Actin G4/UAS GFP-Fascin	376	365.5	1.02873	440.3	633.3	0.695247	443.2	365.4	1.21292	0.978964		fasin-/-; Actin G4/UAS GFP-Fascin	188.8	151.3	1.24785
fasin-/-; Actin G4/UAS GFP-Fascin	309.3	574.8	0.5381	307.6	395.2	0.77834	328.3	250.5	1.31058	0.875673		fasin-/-; Actin G4/UAS GFP-Fascin	482.5	343.7	1.40384
fasin-/-; Actin G4/UAS GFP-Fascin	916.6	425.2	2.15569	711.3	535.1	1.32928	685.6	253.4	2.7056	2.06353		fasin-/-; Actin G4/UAS GFP-Fascin	183.7	184	0.99837
fasin-/-; Actin G4/UAS GFP-Fascin	341.1	257.7	1.32363	312.5	236.8	1.31968	249.8	175.8	1.42093	1.35475		fasin-/-; Actin G4/UAS GFP-Fascin	194.7	165.9	1.1736
fasin-/-; Actin G4/UAS GFP-Fascin	279.3	399.6	0.698949	265.3	304.4	0.871551	319.8	229.3	1.39468	0.988393		fasin-/-; Actin G4/UAS GFP-Fascin	197.8	96.9	2.04128
fasin-/-; Actin G4/UAS GFP-Fascin	241.9	355.5	0.68045	382.4	321.9	1.18795	294.5	372.1	0.791454	0.886617		fasin-/-; Actin G4/UAS GFP-Fascin	201.5	165.7	1.21605
fasin-/-; Actin G4/UAS GFP-Fascin	315.8	168.7	1.87196	422.2	199.4	2.11735	299.6	261.2	1.14701	1.71211		fasin-/-; Actin G4/UAS GFP-Fascin	182.6	141.7	1.28864
fasin-/-; Actin G4/UAS GFP-Fascin	309.8	258.6	1.19799	264.2	141.2	1.8711	286.1	141.7	2.01905	1.69605		fasin-/-; Actin G4/UAS GFP-Fascin	571.5	460.8	1.24023
fasin-/-; Actin G4/UAS GFP-Fascin	508.8	911.3	0.558323	976	795.9	1.22628	491.2	380	1.29263	1.02575		fasin-/-; Actin G4/UAS GFP-Fascin	986.6	753.7	1.30901
fasin-/-; Actin G4/UAS GFP-Fascin	1229	1082.3	1.13554	1769.3	1245.8	1.42021	1274.1	1124.6	1.13294	1.22956		fasin-/-; Actin G4/UAS GFP-Fascin	433	254.8	1.69937
fasin-/-; Actin G4/UAS GFP-Fascin	647.9	392.6	1.65028	545.6	449.3	1.21433	496.5	572	0.868007	1.24421		fasin-/-; Actin G4/UAS GFP-Fascin	370	336.7	1.0989
fasin-/-; Actin G4/UAS GFP-Fascin	772.9	462.6	1.67077	615	710.4	0.865709	550	653.7	0.841365	1.12595		fasin-/-; Actin G4/UAS GFP-Fascin	410.1	343	1.19563
fasin-/-; Actin G4/UAS GFP-Fascin	499.8	452.9	1.10355	476	528.4	0.900833	693.7	371.1	1.86931	1.29123		fasin-/-; Actin G4/UAS GFP-Fascin S52E	330	173.8	1.89873
fasin-/-; Actin G4/UAS GFP-Fascin S52E	903	780.2	1.1574	565.8	935	0.605134	775.9	714.9	1.08533	0.949285		fasin-/-; Actin G4/UAS GFP-Fascin S52E	179	87.8	2.03872
fasin-/-; Actin G4/UAS GFP-Fascin S52E	272	230	1.18261	559.6	333.9	1.67595	476.8	417.9	1.14094	1.33317		fasin-/-; Actin G4/UAS GFP-Fascin S52E	212.8	126.4	1.68354
fasin-/-; Actin G4/UAS GFP-Fascin S52E	601.1	1450.4	0.414437	505.6	1069.5	0.472744	313.3	455	0.688571	0.525251		fasin-/-; Actin G4/UAS GFP-Fascin S52E	297.3	142.7	2.08339
fasin-/-; Actin G4/UAS GFP-Fascin S52E	1554.5	720.3	2.15813	446.1	425.5	1.04841	1109.4	301.1	3.68449	2.29701		fasin-/-; Actin G4/UAS GFP-Fascin S52E	836.8	379.2	2.20675
fasin-/-; Actin G4/UAS GFP-Fascin S52E	1725.6	935	1.84556	2068.9	2835.2	0.729719	2102.5	1491.4	1.40975	1.32834		fasin-/-; Actin G4/UAS GFP-Fascin S52E	354.1	183	1.93497
fasin-/-; Actin G4/UAS GFP-Fascin S52E	195.7	252.6	0.774743	257.4	207	1.24348	1034.6	276.4	3.74313	1.92045		fasin-/-; Actin G4/UAS GFP-Fascin S52E	928.5	311.2	2.98361
fasin-/-; Actin G4/UAS GFP-Fascin S52E	176	289.4	0.608155	110.3	361.1	0.305456	1676.1	462.2	3.62635	1.51332		fasin-/-; Actin G4/UAS GFP-Fascin S52E	279.7	221.6	1.26218
fasin-/-; Actin G4/UAS GFP-Fascin S52E	675.1	397.3	1.69922	960	470	2.04255	427	300.5	1.42097	1.72091		fasin-/-; Actin G4/UAS GFP-Fascin S52E	452.4	267.6	1.69058
fasin-/-; Actin G4/UAS GFP-Fascin S52E	820.6	783.8	1.04695	747.1	325.8	2.29312	788.6	319.1	2.47133	1.93713		fasin-/-; Actin G4/UAS GFP-Fascin S52E	78	33.4	2.33533
fasin-/-; Actin G4/UAS GFP-Fascin S52E	110.4	315.6	0.34981	149.9	524.2	0.28596	144.1	343.8	0.419139	0.351636		fasin-/-; Actin G4/UAS GFP-Fascin S52E	101.9	46.6	2.1867
fasin-/-; Actin G4/UAS GFP-Fascin S52E	246.6	247.7	0.995559	312.9	95.5	3.27644	320.6	117.6	2.72619	2.33273		fasin-/-; Actin G4/UAS GFP-Fascin S52E	430.5	136.6	3.15154
fasin-/-; Actin G4/UAS GFP-Fascin S52E	657.2	1281.1	0.512997	668	639.4	1.04473	511.8	590.5	0.866723	0.80815		fasin-/-; Actin G4/UAS GFP-Fascin S52E	530.3	324.4	1.63471
fasin-/-; Actin G4/UAS GFP-Fascin S52E	1549.5	589	2.63073	1137.5	1012.3	1.12368	1052.7	848.2	1.2411	1.66517		fasin-/-; Actin G4/UAS GFP-Fascin S52E	220.5	156.6	1.40805
fasin-/-; Actin G4/UAS GFP-Fascin S52E	498.9	766.9	0.650541	448.5	323.8	1.38511	491	309.8	1.58489	1.20685		fasin-/-; Actin G4/UAS GFP-Fascin S52E	287	297.2	0.96568
fasin-/-; Actin G4/UAS GFP-Fascin S52E	679	199.3	3.40692	411.2	189.4	2.17107	633.3	200.3	3.16176	2.91325		fasin-/-; Actin G4/UAS GFP-Fascin S52E	1441.1	687.6	2.09584
fasin-/-; Actin G4/UAS GFP-Fascin S52E	2493.7	1832.5	1.36082	3590.6	2189.6	1.63984	2961.6	901.6	3.28483	2.09516
