# Supplementary material for: Fascin limits Myosin activity within Drosophila border cells to control substrate stiffness and promote migration
Source: eLife journal article supplement (doi:10.7554/elife.69836), 2021-10-25
Supplement: supp [file elife-69836-supp-v1.zip › elife_poa_e69836_Figure_6_source_data_1.xlsx]

## Sheet: Sheet1
F: Nurse cell pMRLC quan												G: Border cell pMRLC quan					H: AFM
genotype	psqh 1	actin 1	average 1	psqh 2	actin 2	average 2	psqh 3	actin 3	average 3	average total		genotype	Mean pixel intensity of cluster	Mean pixel intensity of background	cluster/background		mat3/attp2	mat3/Fascin RNAi	c306/+; +/attp2	c306/+;+/Fascin RNAi
attp2/Fascin RNAi	879.103	809.993	1.08532	852.008	368.816	2.31012	935.828	999.182	0.936594	1.44401		attp2/Fascin RNAi	517.57	503	1.02897		14.8	44.95	7.76	15.52
attp2/Fascin RNAi	836.826	714.804	1.17071	592.469	895.414	0.66167	716.959	932.966	0.768473	0.86695		attp2/Fascin RNAi	399.5	411.6	0.970603		16.19	56.73	7.98	13.34
attp2/Fascin RNAi	469.482	847.389	0.554034	421.292	605.592	0.69567	411.71	470.061	0.875865	0.708523		attp2/Fascin RNAi	305.1	329.2	0.926792		11.65	18.55	7.76	9.9
attp2/Fascin RNAi	1088.19	2377.65	0.457674	1864	709	2.62906	624.206	467.877	1.33412	1.47362		attp2/Fascin RNAi	622.4	521.3	1.19394		12.69	34.46	7.83	8.69
attp2/Fascin RNAi	1441.11	1786.92	0.80648	1978.63	1826.29	1.08342	1111.18	1282.04	0.866728	0.918874		attp2/Fascin RNAi	282.2	346.1	0.815371		12.51	50.56	7.86	7.39
attp2/Fascin RNAi	453.8	1328	0.341717	1215.2	980.8	1.23899	1238	643.6	1.92356	1.16809		attp2/Fascin RNAi	665.4	378.8	1.7566		12.16	40.52	7.56	9.71
attp2/Fascin RNAi	916.6	874.9	1.04766	999	1031.5	0.968492	1927.7	837.8	2.30091	1.43902		attp2/Fascin RNAi	558.2	237.8	2.34735		12.16	24.32	7.5	16.4
attp2/Fascin RNAi	1545.5	2030.1	0.761293	721.1	719	1.00292	909.4	1602.3	0.567559	0.777257		attp2/Fascin RNAi	673.6	528.8	1.27383		7.92	44.94	7.41	16.09
attp2/Fascin RNAi	887.7	1730.6	0.512943	1045.8	1352.3	0.773349	811	605.4	1.33961	0.875301		attp2/Fascin RNAi	383.2	320.5	1.19563		8.52	52.51	6.83	17.36
attp2/Fascin RNAi	403	535.8	0.752146	692.4	945.2	0.732543	474.2	237.3	1.99831	1.161		attp2/Fascin RNAi	257.4	271	0.949815		9.51	51.45	3.46	17.83
attp2/Fascin RNAi	440.5	768.4	0.573269	410.9	905.8	0.453632	411.4	876.5	0.469367	0.498756		attp2/Fascin RNAi	642.6	347.3	1.85027		9.72	67.89	5.39	18.87
attp2/Fascin RNAi	629	369.3	1.70322	543.8	617.8	0.88022	465.2	509.7	0.912694	1.16538		attp2/Fascin RNAi	362.9	398.9	0.909752		9.82	79.05	5.96	17.1
attp2/Fascin RNAi	441.8	781.5	0.565323	552.5	2328.4	0.237287	539	2096.9	0.257046	0.353219		attp2/Fascin RNAi	454.2	381.4	1.19088		10.01	46.44	5.61	17.18
attp2/Fascin RNAi	654.5	2051.1	0.319097	916.9	1490.7	0.61508	553.2	2006.5	0.275704	0.403294		attp2/Fascin RNAi	379.4	341.4	1.11131		8.36	34.8	3.4	17.26
attp2/Fascin RNAi	1360.9	1334.7	1.01963	1562.8	1410.9	1.10766	425	460.1	0.923712	1.017		attp2/Fascin RNAi	221.3	299	0.740134		8.68	48.43	5.62	16.96
attp2/Fascin RNAi	397.2	383.8	1.03491	467.5	176.3	2.65173	326.1	246.6	1.32238	1.66968		attp2/Fascin RNAi	144.1	164.2	0.877588		8.74	59.35	5.93	14.93
attp2/Fascin RNAi	352.4	182.4	1.93202	232.2	350.1	0.663239	218.1	387.3	0.563129	1.0528		attp2/Fascin RNAi	228.1	207.5	1.09928		8.81	61.35	5.9	18.5
attp2/Fascin RNAi	329.3	611.8	0.538248	356.9	758.1	0.470782	368.5	657.1	0.560797	0.523276		attp2/Fascin RNAi	454.2	252.1	1.80167		8.95	63.78	3.57	18.05
attp2/Fascin RNAi	694.9	319.3	2.17632	498.1	217.2	2.29328	303.3	397.6	0.762827	1.74414		attp2/Fascin RNAi	228.4	279.4	0.817466		15.46	62	7.3	18.47
attp2/Fascin RNAi	304	1348	0.225519	283.4	497.4	0.569763	300.3	886.8	0.338633	0.377972		attp2/Fascin RNAi	418.4	307.1	1.36242		11.49	59.78	6.1	19.2
attp2/Fascin RNAi	497.5	567.7	0.876343	466.9	260.7	1.79095	498.1	671	0.742325	1.13654		attp2/Fascin RNAi	555.3	466.5	1.19035		12.81	63.81	3.11	17.8
attp2/Fascin RNAi	1545.5	2030.1	0.761293	721.1	719	1.00292	909.4	1602.3	0.567559	0.777257		c306/+; attp2/+	379.9	378.8	1.0029		13.03	46.02	5.42	17.71
c306/+; attp2/+	440	427.4	1.02948	600.8	400.3	1.50087	590	343	1.72012	1.41682		c306/+; attp2/+	298.5	232.8	1.28222		12.85	66.05	5.45	27.71
c306/+; attp2/+	558.4	510.5	1.09383	523	713.2	0.733315	437.4	1199.2	0.364743	0.730629		c306/+; attp2/+	588.4	508.1	1.15804		13.03	75.49	6.22	19.15
c306/+; attp2/+	723	917	0.788441	982.7	765	1.28458	853.9	296.7	2.87799	1.65034		c306/+; attp2/+	371.9	382.3	0.972796		11.08	64.36	2.97	19.74
c306/+; attp2/+	602.1	583.9	1.03117	484.8	643.5	0.75338	738.7	896.7	0.823798	0.869449		c306/+; attp2/+	222.6	223.5	0.995973		11.86	67.13	2.62	19.89
c306/+; attp2/+	290	659.1	0.439994	341.8	620.4	0.550935	289.6	634.6	0.45635	0.482426		c306/+; attp2/+	219.1	212.9	1.02912		13.23	60.04	5.48	20.25
c306/+; attp2/+	363.4	730.2	0.497672	325.3	519.5	0.626179	356.7	524.2	0.680465	0.601439		c306/+; attp2/+	236.8	258	0.917829		13.16	58.93	8.13	18.14
c306/+; attp2/+	862.6	893.3	0.965633	590.4	502.4	1.17516	422.2	339.5	1.24359	1.12813		c306/+; attp2/+	214.9	201.4	1.06703		13.18	67.33	5.69	18.99
c306/+; attp2/+	447.7	332.7	1.34566	313.3	263.3	1.1899	895.2	321.4	2.78531	1.77362		c306/+; attp2/+	358.3	390.3	0.918012		13.75	59.64	5.93	20.59
c306/+; attp2/+	1203.6	655.5	1.83616	493.3	668.4	0.738031	687.1	581.9	1.18079	1.25166		c306/+; attp2/+	219.4	156.9	1.39834		12.03	71.48	5.63	18.87
c306/+; attp2/+	271.4	372.1	0.729374	366.4	325.1	1.12704	408.8	226.7	1.80326	1.21989		c306/+; attp2/+	179.1	110.6	1.61935		10.99	74.38	5.87	16.74
c306/+; attp2/+	205.3	172.5	1.19014	300.1	139.4	2.1528	184.1	105.8	1.74008	1.69434		c306/+; attp2/+	265.6	224.7	1.18202		11.96	28.38	5.82	20.18
c306/+; attp2/+	265.1	197.9	1.33957	259.2	279.2	0.928367	127.3	456.1	0.279105	0.849013		c306/+; attp2/+	182.1	164.3	1.10834		12.22	29.5	5.98	19.17
c306/+; attp2/+	344.3	743.3	0.463205	268.9	741.1	0.362839	456.1	743.2	0.613698	0.479914		c306/+; +/Fascin RNAi	1278.1	510.5	2.50362		12.36	32.67	5.95	18.68
c306/+; +/Fascin RNAi	1170.1	1615.9	0.724117	2033.3	1375.6	1.47812	1737.9	1960.7	0.886367	1.02953		c306/+; +/Fascin RNAi	544.4	450.8	1.20763		12.59	35.66	6.18	19.11
c306/+; +/Fascin RNAi	868	2421	0.35853	538	1272.7	0.422723	887	1259	0.704527	0.49526		c306/+; +/Fascin RNAi	2019.6	592.4	3.40918		10.16	32.92	4.79	18.58
c306/+; +/Fascin RNAi	827	585	1.41368	975.6	363	2.6876	877.7	354.1	2.47868	2.19332		c306/+; +/Fascin RNAi	1107.3	498.6	2.22082		12.54	34.41	5.25	19.58
c306/+; +/Fascin RNAi	1641	500	3.282	1226	422	2.90521	1215.8	940.1	1.29327	2.49349		c306/+; +/Fascin RNAi	709.7	426.9	1.66245		13.31	38.11	5.68	22.18
c306/+; +/Fascin RNAi	936.6	1988	0.471127	925.2	846.8	1.09258	1189.2	587.6	2.02383	1.19585		c306/+; +/Fascin RNAi	1739.8	595.6	2.92109		13.42	40.25	5.42	17.03
c306/+; +/Fascin RNAi	1139.1	544	2.09393	984	647	1.52087	724.2	434.1	1.66828	1.76103		c306/+; +/Fascin RNAi	573.9	175.3	3.27382		13.56	41.21	5.33	8.48
c306/+; +/Fascin RNAi	1569.3	594.3	2.64059	1759.4	740.6	2.37564	976.2	575.6	1.69597	2.2374		c306/+; +/Fascin RNAi	423.3	253.2	1.6718		13.43	28.39	3.36	13.32
c306/+; +/Fascin RNAi	643.8	653.1	0.98576	1006.6	283.2	3.55438	1139.1	316.1	3.60361	2.71458		c306/+; +/Fascin RNAi	195.5	78.5	2.49045		10.08	26.12	5.49	15.42
c306/+; +/Fascin RNAi	242.5	245.6	0.987378	197	203.1	0.969966	299	319.9	0.934667	0.964003		c306/+; +/Fascin RNAi	379.2	210.6	1.80057		11	29.26	5.71	13.38
c306/+; +/Fascin RNAi	1120.2	1014.5	1.10419	1119.2	1036.2	1.0801	651.8	524.1	1.24366	1.14265		c306/+; +/Fascin RNAi	209.6	145	1.44552		11.8	30.81	5.37	4.35
c306/+; +/Fascin RNAi	1134.1	446.1	2.54226	1028.6	975.1	1.05487	1238.3	438.4	2.82459	2.14057		c306/+; +/Fascin RNAi	348.3	219.2	1.58896		12.09	28.23	4.75	11.32
c306/+; +/Fascin RNAi	679.4	491.3	1.38286	920.9	568.7	1.61931	595.5	523.5	1.13754	1.3799		c306/+; +/Fascin RNAi	220.9	186	1.18763		12.5	30.13	4.23	13.99
c306/+; +/Fascin RNAi	276.7	77.3	3.57956	254	132.5	1.91698	284.9	73.3	3.88677	3.12777		c306/+; +/Fascin RNAi	232.3	225.4	1.03061		12.72	29.38	3.98	18.45
c306/+; +/Fascin RNAi	706.4	430.1	1.64241	677.9	350.9	1.93189	854.3	365.7	2.33607	1.97012		c355/+; attp2/+	312.7	241.3	1.2959		18.53	30.37	4.53	19.26
c355/+; attp2/+	664.8	1597.8	0.416072	629.2	1716.3	0.366603	2139.1	2103.3	1.01702	0.599899		c355/+; attp2/+	502.6	370.1	1.35801		18.9	29.76	4.21	19.13
c355/+; attp2/+	1065	783.7	1.35894	749.4	1007.9	0.743526	868.9	1514.3	0.573796	0.892087		c355/+; attp2/+	580.6	390.5	1.48681		19.46	26.22	4.33	21.4
c355/+; attp2/+	942.2	446.8	2.10877	866	925.9	0.935306	1255.2	1580.3	0.79428	1.27945		c355/+; attp2/+	513.7	376	1.36622		19.18	23.94	4.37	18.37
c355/+; attp2/+	1068.9	1705.1	0.626884	1218.2	677.6	1.79782	1707.1	1647.2	1.03636	1.15369		c355/+; attp2/+	506.6	558.1	0.907723		18.97	31.9	3.85	19.32
c355/+; attp2/+	747.4	353.7	2.11309	765.2	358.6	2.13385	377	290	1.3	1.84898		c355/+; attp2/+	464.9	456.4	1.01862		19.96	30.07	4.39	20.02
c355/+; attp2/+	760.9	1770.6	0.429741	520.4	1905.9	0.273047	661.9	2102.6	0.314801	0.339196		c355/+; attp2/+	248.4	206	1.20583		15.81	32.08	5.56	20.6
c355/+; attp2/+	1014.9	1265.2	0.802166	712.1	395.2	1.80187	665.7	306.2	2.17407	1.5927		c355/+; attp2/+	828.7	782.3	1.05931		17.01	32.41	5.85	19.07
c355/+; attp2/+	516.5	541.8	0.953304	613	282.8	2.16761	672.3	319.1	2.10686	1.74259		c355/+; attp2/+	1244.7	893.6	1.39291		18.07	34.06	5.62	20.57
c355/+; attp2/+	1071.8	2292.6	0.467504	668	2222.7	0.300535	847.5	1226.4	0.691047	0.486362		c355/+; attp2/+	395.2	340.9	1.15928		17.88	33.28	5.46	20.97
c355/+; attp2/+	659.2	1014.8	0.649586	913.2	625.1	1.46089	573	292	1.96233	1.3576		c355/+; attp2/+	550.3	698.9	0.78738		18.78	33.09	5.59	18.68
c355/+; attp2/+	797.4	905.5	0.880618	528.1	718.1	0.735413	573.5	569.5	1.00702	0.874352		c355/+; attp2/+	716.2	528.2	1.35593		18.32	31.15	6.33	17.45
c355/+; attp2/+	1512.1	892.2	1.6948	1146.8	1700.7	0.674311	627.9	1231.2	0.50999	0.9597		c355/+; attp2/+	1278.5	846.5	1.51034		18.73	31.76	6.03	18.6
c355/+; attp2/+	1291	1325.4	0.974046	1038.3	1181.9	0.878501	847	142.5	5.94386	2.5988		c355/+; attp2/+	964.5	737.5	1.3078		18.53	32.52	5.76	16.12
c355/+; attp2/+	608.7	380.1	1.60142	429.9	833.3	0.515901	582.9	727.1	0.801678	0.973		c355/+; attp2/+	1150.2	830.9	1.38428		17.59	33.7	5.58	16.24
c355/+; attp2/+	2197.4	3181.7	0.690637	904.5	2562.8	0.352934	1074.6	3762.6	0.2856	0.443057		c355/+; +/Fascin RNAi	1003.3	405.77	2.47258		18.07	36.01	4.05	24.36
c355/+; attp2/+	664.8	1597.8	0.416072	629.2	1716.3	0.366603	2139.1	2103.3	1.01702	0.599899		c355/+; +/Fascin RNAi	722.5	441.3	1.63721		18.97	34.08	4.09	26.37
c355/+; attp2/+	1065	783.7	1.35894	749.4	1007.9	0.743526	868.9	1514.3	0.573796	0.892087		c355/+; +/Fascin RNAi	1502.7	947.3	1.5863		18.86	36.94	4.25	24.1
c355/+; attp2/+	942.2	446.8	2.10877	866	925.9	0.935306	1255.2	1580.3	0.79428	1.27945		c355/+; +/Fascin RNAi	1547.3	745.1	2.07663		18.71	33.68	4.24	24.65
c355/+; attp2/+	1068.9	1705.1	0.626884	1218.2	677.6	1.79782	1707.1	1647.2	1.03636	1.15369		c355/+; +/Fascin RNAi	1272.2	673.7	1.88838		13.76	36.76	4.55	24.22
c355/+; +/Fascin RNAi	4095	3565.1	1.14864	3787.8	2580.6	1.4678	1213.4	2008.2	0.604223	1.07355		c355/+; +/Fascin RNAi	1378.4	702.2	1.96297		17.39	30.82	4.47	25.47
c355/+; +/Fascin RNAi	3039.1	1697.5	1.79034	3924.5	2390.7	1.64157	4095	3516.7	1.16444	1.53212		c355/+; +/Fascin RNAi	534.4	351.5	1.52034		17.68	28.24	4.01	25.08
c355/+; +/Fascin RNAi	3779.7	1868.2	2.02318	2270	3042.6	0.746072	1759.1	518.4	3.39333	2.05419		c355/+; +/Fascin RNAi	514.6	224.1	2.2963		17.32	32.24	3.99	25.04
c355/+; +/Fascin RNAi	2598.8	1682.6	1.54451	2970	1911.5	1.55375	2579.5	938.3	2.74912	1.94913		c355/+; +/Fascin RNAi	769.5	304.5	2.52709		17.11	33.61	3.84	24.94
c355/+; +/Fascin RNAi	1030.9	1252.2	0.823271	666	777.5	0.856592	603.6	1718.5	0.351237	0.677033		c355/+; +/Fascin RNAi	734	297.3	2.46889		17.15	35.4	7.18	25.8
c355/+; +/Fascin RNAi	753.4	1062.6	0.709016	849	1200	0.7075	646.5	1719.5	0.375981	0.597499		c355/+; +/Fascin RNAi	665.7	201.2	3.30865		15.17	32.25	6.96	25.74
c355/+; +/Fascin RNAi	1268.4	467.2	2.7149	1068.1	371.4	2.87588	802.8	353.2	2.27293	2.62124		c355/+; +/Fascin RNAi	945.9	438	2.15959		16.23	34.04	7.31	25.11
c355/+; +/Fascin RNAi	1368.2	1256.1	1.08924	1475.1	1209.4	1.2197	3968.2	4095	0.969035	1.09266		c355/+; +/Fascin RNAi	618.6	250.4	2.47045		16.02	34.34	7.08	16.05
c355/+; +/Fascin RNAi	1010.9	1289.1	0.784191	1063.3	575.7	1.84697	872.1	829	1.05199	1.22772		c355/+; +/Fascin RNAi	2198.6	645.2	3.40763		16.77	32.62	7.28	24.03
c355/+; +/Fascin RNAi	1540.4	564	2.73121	1768.4	279.8	6.32023	1253.5	423.6	2.95916	4.00353		c355/+; +/Fascin RNAi	2158.2	1077.9	2.00223		16.8	30.66	7.04	24.66
c355/+; +/Fascin RNAi	1019	686	1.48542	669.6	632.5	1.05866	641.4	973.8	0.658657	1.06758		c355/+; +/Fascin RNAi	2332.9	976.3	2.38953		16.61	24.69	6.96	24.92
c355/+; +/Fascin RNAi	2097.6	1807.1	1.16075	2488.9	1986.3	1.25303	2285.7	1623.8	1.40762	1.2738		c355/+; +/Fascin RNAi	1961.3	833.1	2.35422		16	29.06	4.26	25.28
c355/+; +/Fascin RNAi	1088.3	1574.9	0.691028	902.4	1325.3	0.680902	1231.1	1115.2	1.10393	0.825286		mat3/attp2	1100.6	502.2	2.19156		17.5	28.62	6.64	24.83
c355/+; +/Fascin RNAi	2059.4	1698.8	1.21227	1696.1	1406.9	1.20556	3840.1	2782.8	1.37994	1.26592		mat3/attp2	764.1	335.9	2.27478		16.79	28.65	6.26	25.59
c355/+; +/Fascin RNAi	3619.1	1944.4	1.86129	2810.7	1730.2	1.62449	4045.7	3004.6	1.3465	1.61076		mat3/attp2	529.9	301.1	1.75988		16.97	28	6.34	24.49
c355/+; +/Fascin RNAi	3957.7	2023.1	1.95626	3402.4	922.3	3.68904	3197.1	2101.1	1.52163	2.38898		mat3/attp2	455.6	276.5	1.64774		17.09	30.35	6.46	24.3
c355/+; +/Fascin RNAi	2818.7	2057.6	1.3699	2685.3	1592.1	1.68664	2588.1	2007.5	1.28922	1.44858		mat3/attp2	704.1	342.4	2.05637		16.95	28.18	6.54	25.2
c355/+; +/Fascin RNAi	4095	3565.1	1.14864	3787.8	2580.6	1.4678	1213.4	2008.2	0.604223	1.07355		mat3/attp2	653.6	453.5	1.44123		22.06	31.84	6.68	24.11
c355/+; +/Fascin RNAi	3039.1	1697.5	1.79034	3924.5	2390.7	1.64157	4095	3516.7	1.16444	1.53212		mat3/attp2	246.5	271.9	0.906583		33.31	31.24	6.92	23.82
c355/+; +/Fascin RNAi	3779.7	1868.2	2.02318	2270	3042.6	0.746072	1759.1	518.4	3.39333	2.05419		mat3/attp2	250.2	360.1	0.694807		22.99	30.46	6.46	24.22
c355/+; +/Fascin RNAi	2598.8	1682.6	1.54451	2970	1911.5	1.55375	2579.5	938.3	2.74912	1.94913		mat3/attp2	228.3	205.1	1.11312		21.7	31.56	7.43	24.93
mat3/attp2	733	503	1.45726	635.9	887.9	0.716184	761.6	627.7	1.21332	1.12892		mat3/attp2	288.9	325.5	0.887558		21.67	30.5	4.97	24.73
mat3/attp2	456.1	1058.9	0.43073	534.9	833.6	0.641675	473.5	630.7	0.750753	0.607719		mat3/attp2	358.1	430.6	0.83163		21.81	31.87	5	24.56
mat3/attp2	754.7	477.2	1.58152	966.3	922.3	1.04771	527	359	1.46797	1.36573		mat3/attp2	444.1	440.1	1.00909		22.54	30.71	3.63	25.05
mat3/attp2	566	1583.6	0.357413	337	1493.1	0.225705	534.3	548.1	0.974822	0.519314		mat3/attp2	268.5	307.6	0.872887		23.43	31.17	5.69	22.34
mat3/attp2	535.8	1397	0.383536	856.7	3916.4	0.218747	524.1	1394.1	0.375941	0.326075		mat3/attp2	366.6	465.9	0.786864		26.65	31.41	5.32	23.16
mat3/attp2	1915.7	1051.6	1.8217	878.5	613.5	1.43195	1306.2	868.6	1.5038	1.58582		mat3/attp2	394.9	457.3	0.863547		18.07	31.84	4.92	22.65
mat3/attp2	530.7	806	0.658437	362.1	831.5	0.435478	459	446.1	1.02892	0.707611		mat3/attp2	415.9	392.3	1.06016		11.74	12.22	5.19	22.46
mat3/attp2	389.1	484.9	0.802433	463.5	832.6	0.55669	521	1003	0.519442	0.626188		mat3/attp2	660.3	454.6	1.45249		35.8	15.81	5.21	22.86
mat3/attp2	308.7	360.9	0.855362	335.6	317	1.05868	451.9	205.9	2.19475	1.3696		mat3/attp2	687.1	620.9	1.10662		11.44	4.36	5.24	22.9
mat3/attp2	618.2	707.1	0.874275	468.8	890	0.526742	435.8	332.4	1.31107	0.904029		mat3/Fascin RNAi	127.6	194.5	0.656041		31.76	3.48	6.24	22.52
mat3/attp2	772.6	645.3	1.19727	1003.8	434.2	2.31184	529	150.7	3.51029	2.3398		mat3/Fascin RNAi	223.1	143.2	1.55796		30.94	4.25	6.55	22.64
mat3/attp2	999.4	587.4	1.7014	666.5	413.8	1.61068	837.5	677.7	1.2358	1.51596		mat3/Fascin RNAi	201.5	162.2	1.24229		13.62	3.45	6.5	22.14
mat3/attp2	455.2	231.1	1.96971	478.1	387.4	1.23412	422.9	265.8	1.59105	1.59829		mat3/Fascin RNAi	146.8	148.8	0.986559		10.33	3.99	6.35	23.38
mat3/attp2	763.1	513.9	1.48492	1078.4	423.5	2.5464	1593.7	1411.1	1.1294	1.72024		mat3/Fascin RNAi	309.1	278.3	1.11067		36.29	7.45	6.1	22.59
mat3/attp2	632.4	681.8	0.927545	541.4	267.9	2.0209	557.7	418.5	1.33262	1.42702		mat3/Fascin RNAi	386.8	173.6	2.22811		20.89	4.91	5.89	23.6
mat3/attp2	1201.1	778.6	1.54264	511.2	1521.1	0.336073	547.4	1444.4	0.378981	0.752565		mat3/Fascin RNAi	269.6	198.6	1.3575		32.64	10.34	6.03	24.42
mat3/attp2	784.1	665.6	1.17803	589.2	641.1	0.919045	651.5	323.1	2.0164	1.37116		mat3/Fascin RNAi	875	491.3	1.78099		30.76	5.73	5.96	23.07
mat3/attp2	858.1	1818.7	0.471821	1328.2	2001.9	0.66347	1227.3	1652	0.742918	0.626069		mat3/Fascin RNAi	193.3	115.7	1.6707		30.66	9.53	6	23.84
mat3/Fascin RNAi	224.4	901.8	0.248836	2164.2	592.9	3.65019	2222.8	576.7	3.85434	2.58446		mat3/Fascin RNAi	160.9	132.5	1.21434		7.01	10.13	7.04	23.9
mat3/Fascin RNAi	2266	864	2.62269	2397	720.4	3.32732	2288.8	893.1	2.56276	2.83759		mat3/Fascin RNAi	318.8	165	1.93212		9.75	3.1	6.36	24.21
mat3/Fascin RNAi	1117.8	660.3	1.69287	949.7	212.3	4.47339	1327.7	457.2	2.90398	3.02341		mat3/Fascin RNAi	315.3	174.5	1.80688		10.91	9.8	6.85	24.46
mat3/Fascin RNAi	288	750.4	0.383795	1449.1	276.5	5.24087	1536.7	408.9	3.75813	3.1276		mat3/Fascin RNAi	352.8	266.7	1.32283		10.91	8.95	6.94	25.18
mat3/Fascin RNAi	496.1	1286.8	0.38553	652.2	266.7	2.44544	2405	584.1	4.11745	2.31614		mat3/Fascin RNAi	411.5	309.6	1.32913		8.25	9.32	7.15	24.3
mat3/Fascin RNAi	314	269	1.16729	1356.7	266.5	5.09081	340.4	733.3	0.464203	2.24077		mat3/Fascin RNAi	1204.8	529.4	2.27578		10.17	9.03	7.13	15.14
mat3/Fascin RNAi	1543	464.5	3.32185	1776	420.8	4.22053	315.7	678.4	0.46536	2.66925		mat3/Fascin RNAi	716.5	649.5	1.10316		21.7	8.43	7.39	8.06
mat3/Fascin RNAi	1572.2	832.9	1.88762	1655.8	393.2	4.21109	458.2	250.8	1.82695	2.64189		mat3/Fascin RNAi	269.5	253.4	1.06354		10.77	8.87	7.3	9.42
mat3/Fascin RNAi	668.8	263.4	2.5391	470.4	329.1	1.42935	165.6	107.1	1.54622	1.83823		mat3/Fascin RNAi	747.8	650.1	1.15028		31.63	8.63	7.54	10.96
mat3/Fascin RNAi	302.7	495	0.611515	200.2	122.7	1.63162	224.3	149.5	1.50033	1.24782							11.46	7.37	29.46	13.83
mat3/Fascin RNAi	1517.7	384.3	3.94926	2015.6	822.4	2.45088	2122.8	561.7	3.77924	3.39313							33.08	1.29	19.7	15.29
mat3/Fascin RNAi	284.1	131.3	2.16375	309.7	145.9	2.12269	397.1	121.3	3.2737	2.52005							12.3	1.56	18.09	14.99
mat3/Fascin RNAi	508.1	106.5	4.77089	479.3	351.1	1.36514	550.4	220	2.50182	2.87928							11.64	16.7	20.11	24.38
mat3/Fascin RNAi	1760.7	1632.7	1.0784	1002.4	611.2	1.64005	1577	1072	1.47108	1.39651							32.62	9.89	18.39	23.71
mat3/Fascin RNAi	3462.8	404.1	8.56917	2540.1	541	4.69519	2740.1	313.3	8.74593	7.33676							10.04	13.57	11.39	23.79
mat3/Fascin RNAi	1678.9	343.7	4.88478	1110.1	123.7	8.97413	900.9	240.4	3.7475	5.86881							18.3	13.64	17.41	24.54
mat3/Fascin RNAi	557.2	879.3	0.633686	403.5	160.5	2.51402	333.3	349.7	0.953103	1.36694							12.51	7.17	17.42	24.59
mat3/Fascin RNAi	1708.8	1535.6	1.11279	1231.2	1512.1	0.814232	719.6	935.6	0.769132	0.898718							30.88	31.06	10.29	23.64
																	11.78	30.88	31.62	24.22
																	30.19	29.68	26.57	24.74
																	10.05	30.14	16.17	24.77
																	12.1	30.8	26.48
																	31.35	30.37	19.29
																	17.08	31.1	23.84
																	31.05	32.45	23.07
																	32.94	31.72	26.04
																	32.62	30.57	38.58
																	17.36	30.02	34.99
																	35.63	31.22	32.5
																	13.28	29.61	38.67
																	41.55	29.71	34.74
																	32.44	30.21	41.41
																	24.52	32.7	36.88
																	20.6	30.76	33.05
																	22.52	31.13	54.28
																	23.06	15.16	43.57
																	23.48	29.62	45.35
																	24.11	29.95	39.33
																	23.13	29.65	43.31
																	23.75	20.36	41.54
																	23.6	28.49	41.51
																	25.45	28.66	39.76
																	23.95	27.92	29.15
																	24.68	28.2	23.67
																	22.57	28.9	18.78
																	22.47	36.15	19.51
																	23.56	38.6	22.92
																	22.9	38.23	22.2
																	23.37	35.26	16.78
																	24.32	37.26	27.7
																	25.86	36.53	30.77
																	26.24	35.33	25.85
																	24.65	36.12	24.57
																	22.55	38.84	23.9
																	22.45	40.36	23.84
																	23.54	40.45	25.5
																	22.9	39.19	21.95
																	23.35	38.72	23.64
																	24.32	39.15	30.34
																	25.97	39.39	32.62
																	26.05	39.79	26.24
																	24.89	38.98	29.63
																	24.78	21.62	33.13
																	24.82	22.42	32.15
																	25.14	23.18	28.37
																	25.43	20.26	30.6
																	25.02	29.98
																	26.14	32.71
																	25.07	22.71
																	22.68	25.35
																	23.34	20.76
																	22.94	20.45
																	23.26	21.31
																	22.31	20.9
																	23.25	20.94
																	22.61	20.25
																	23.23	21.47
																	24.95	19.86
																	22.77	21.39
																	22.65	35.42
																	21.75	29.75
																	23.31	19.52
																	22.31	19.73
																	22.3	19.27
																	21.71	19.62
																	22.48	20.09
																	25.14	19.93
																	21.85	20.47
																	15.25	20.48
																	15.79	16.54
																	18.74	18.3
																	35.31	16.82
																	14.41	17.84
																	33.9	17.08
																	35.13	18.38
																	19.12	18.86
																	13.47	17.52
																	8.48	40.31
																	8.13	41.76
																	7.86	41.31
																	6.25	42.29
																	8.03	40.3
																	7.19	42.26
																	7.92	41.42
																	12.5	42.28
																	34.02	21.55
																	7.5	23.32
																	7.17	21.57
																	5.75	20.02
																	6.84	19.88
																	7.58	20
																	7.01	20.36
																	6.94	19.34
																	19.34
																	15.06
																	6.22
																	7.55
																	9.31
																	8.26
																	8.61
																	4.16
																	8.14
																	23.9
																	20.27
																	15.05
																	17.62
																	16.36
																	16.73
																	16.66
																	16.7
																	13.72
																	41.62
																	40.86
																	40.32
																	29.96
																	41.83
																	43.08
																	41.89
																	43.21
																	34.18
																	35.66
																	32.88
																	34.12
																	33.77
																	33.44
																	31.38
																	32.87
																	33.3
																	11.15
																	21.08
																	12.83
																	13.59
																	11.8
																	14.15
																	13.3
																	13.37
																	9.89
																	31.54
																	29.32
																	31.23
																	28.95
																	32.81
																	32.76
																	31.55
																	30.66
																	31.48
																	32.51
																	35.7
																	35.11
																	37.63
																	37.51
																	38.05
																	37.86
																	37.21
																	29
																	30.41
																	25.61
																	24.28
																	21.43
																	24.63
																	25.92
																	22.15
																	30.21
																	30.34
																	28.19
																	27.83
																	32.02
																	32.48
																	30.39
																	32.25
