# Supplementary material for: Fascin limits Myosin activity within Drosophila border cells to control substrate stiffness and promote migration
Source: eLife journal article supplement (doi:10.7554/elife.69836), 2021-10-25
Supplement: supp [file elife-69836-supp-v1.zip › elife_poa_e69836_Figure_7_figure_supplement_1_source_data_1.xlsx]

## Sheet: Sheet1
C: Nurse cell pMRLC quan												D: Border cell pMRLC quan
genotype	psqh 1	actin 1	average 1	psqh 2	actin 2	average 2	psqh 3	actin 3	average 3	average total		genotype	Mean pixel intensity of cluster	Mean pixel intensity of background	cluster/background
c306/+	1212	522.5	2.31962	465	655.9	0.70895	663.3	690.1	0.961165	1.32991		c306/+	340.1	274	1.24124
c306/+	349.3	549.3	0.6359	533.5	867.6	0.614915	369.3	327.9	1.12626	0.792358		c306/+	263.3	252.4	1.04319
c306/+	441.3	2668.2	0.165392	460.2	1563.3	0.294377	401.3	736.2	0.545096	0.334955		c306/+	356.1	254.6	1.39866
c306/+	309.1	794.5	0.38905	349.8	655.9	0.533313	296.2	353.3	0.838381	0.586915		c306/+	275.8	242.3	1.13826
c306/+	288	425.9	0.676215	400.3	270.5	1.47985	313.7	319.5	0.981847	1.04597		c306/+	438.9	142.7	3.07568
c306/+	625.4	343.7	1.81961	547.8	638	0.858621	741.4	460.1	1.61139	1.42987		c306/+	666.2	377.5	1.76477
c306/+	520.2	1036.8	0.501736	589	927.4	0.635109	326.9	722.7	0.452332	0.529726		c306/+	337	276.5	1.21881
c306/+	1367.5	694.3	1.96961	1251	734	1.70436	1692.5	434.8	3.89259	2.52219		c306/+	943.7	746.5	1.26417
c306/+	1033.6	2095.7	0.4932	1208.6	1452.6	0.832025	1598.4	1476.4	1.08263	0.80262		c306/+	1161.6	753	1.54263
c306/+	763	1233	0.618816	1034.1	775.9	1.33277	874.2	586.4	1.49079	1.14746		c306/+	803.5	617.5	1.30121
c306/+	701.8	977.1	0.718248	931.8	1016.9	0.916314	880.9	812.1	1.08472	0.906427		c306/+	799.1	718.8	1.11171
c306/+	1057	3567	0.296327	839.2	440.5	1.90511	915.5	965.6	0.948115	1.04985		c306/+	695.9	583.4	1.19284
c306/+	987.2	2836.9	0.347985	1242.9	658.5	1.88747	1264.8	1460.3	0.866123	1.03386		c306/+	1177.7	803.9	1.46498
c306/+	736	862	0.853828	708.7	315.4	2.24699	848	970	0.874227	1.32501		c306/+	583	542.9	1.07386
c306/+	1052.2	672	1.56577	1055.9	397.2	2.65836	1041.3	428.6	2.42954	2.21789		c306/+	1070.9	471.9	2.26934
c306/+	877.6	481.8	1.8215	1077.7	1981.3	0.543936	808.2	357.3	2.26196	1.54247		c306/+	936.6	647	1.4476
c306/+	768	880	0.872727	600.6	509.1	1.17973	421.4	421.6	0.999526	1.01733		c306/+	394.3	368.5	1.07001
c306/+	1047	1989	0.526395	984.1	1724.1	0.570791	969.6	1690.8	0.573456	0.556881		c306/+	983.1	582.8	1.68686
c306/+	553.4	386.5	1.43182	371.6	699.3	0.531389	567.6	527.1	1.07684	1.01335		c306/+	318.1	320.8	0.991584
UAS-Rok-CAT	824.2	326.7	2.5228	817.1	635.3	1.28616	827.8	750.7	1.1027	1.63722		UAS-Rok-CAT	755.3	492.2	1.53454
UAS-Rok-CAT	430.6	743.2	0.579386	469.5	586.5	0.800512	531.3	505.4	1.05125	0.810381		UAS-Rok-CAT	360	270.4	1.33136
UAS-Rok-CAT	656.2	410.4	1.59893	602.2	191.5	3.14465	479	202.4	2.3666	2.37006		UAS-Rok-CAT	364.1	310	1.17452
UAS-Rok-CAT	1116.4	654	1.70703	1141.4	707.2	1.61397	1370.7	2325.1	0.589523	1.30351		UAS-Rok-CAT	839.2	447.8	1.87405
UAS-Rok-CAT	1100.2	872.1	1.26155	1722.2	1018.2	1.69142	2129.9	1001.9	2.12586	1.69294		UAS-Rok-CAT	1107.3	738.5	1.49939
UAS-Rok-CAT	1327.1	1111.7	1.19376	1737.6	973.4	1.78508	1083.5	978.1	1.10776	1.3622		UAS-Rok-CAT	1449	543.1	2.66802
UAS-Rok-CAT	1191.1	450.3	2.64513	974.8	2062.7	0.472584	668.5	478.6	1.39678	1.50483		UAS-Rok-CAT	814.2	668.2	1.2185
UAS-Rok-CAT	1394.7	643.9	2.16602	1046.8	878.2	1.19198	726.8	397.9	1.82659	1.7282		UAS-Rok-CAT	696	394.7	1.76336
UAS-Rok-CAT	918.9	565.2	1.6258	747.4	1054.4	0.708839	701.6	454.4	1.54401	1.29288		UAS-Rok-CAT	526.9	518.9	1.01542
UAS-Rok-CAT	828.8	246.1	3.36774	765.7	523.2	1.46349	720.9	282.4	2.55276	2.46133		UAS-Rok-CAT	670.1	600.5	1.1159
UAS-Rok-CAT	630.5	337.8	1.86649	680	264	2.57576	747.8	192.9	3.87662	2.77296		UAS-Rok-CAT	631.4	410.7	1.53738
UAS-Rok-CAT	518.6	409.2	1.26735	572.2	329.8	1.73499	567.8	386.3	1.46984	1.49073		UAS-Rok-CAT	519.2	333.8	1.55542
UAS-Rok-CAT	601.5	254.8	2.36068	405.7	299.8	1.35324	498.7	301.8	1.65242	1.78878		UAS-Rok-CAT	482.4	317.6	1.51889
UAS-Rok-CAT	1165.2	698.2	1.66886	1525.9	743.1	2.05342	641.9	459.7	1.39635	1.70621		UAS-Rok-CAT	482.7	310.3	1.55559
UAS-Rok-CAT	541.9	1008.1	0.537546	891.3	643.4	1.3853	758.9	1093.5	0.69401	0.872284		UAS-Rok-CAT	950.1	480.1	1.97896
UAS-Rok-CAT	484.2	508.7	0.951838	533.8	334.4	1.59629	425.5	297.8	1.42881	1.32565		UAS-Rok-CAT	668.9	276.3	2.42092
UAS-Rok-CAT	550.1	192.4	2.85915	362.9	523.1	0.693749	496.2	308.3	1.60947	1.72079		UAS-Rok-CAT	356.6	243.4	1.46508
UAS-Rok-CAT	535.8	180.8	2.9635	659.3	231.5	2.84795	425.9	351.1	1.21304	2.3415		UAS-Rok-CAT	370.8	328.8	1.12774
UAS-Rok-CAT	637.8	301.2	2.11753	559.5	379.9	1.47276	505	116	4.35345	2.64791		UAS-Rok-CAT	369.9	278.8	1.32676
UAS-Rok-CAT	646.3	664.7	0.972318	617.3	300.2	2.0563	599.6	683.4	0.877378	1.302		UAS-Rok-CAT	504.6	405.8	1.24347
c306/+; +/UAS-Rok-CAT	2596.3	449.4	5.77726	794.7	428.3	1.85548	667.2	139.9	4.76912	4.13395		c306/+; +/UAS-Rok-CAT	821.8	402.1	2.04377
c306/+; +/UAS-Rok-CAT	2113.1	341.2	6.19314	2089.4	451.4	4.62871	1065.7	262.1	4.06601	4.96262		c306/+; +/UAS-Rok-CAT	828.9	372.7	2.22404
c306/+; +/UAS-Rok-CAT	1351.7	726.2	1.86133	605.1	328.9	1.83977	757.9	200.1	3.78761	2.49624		c306/+; +/UAS-Rok-CAT	694.5	324.2	2.1422
c306/+; +/UAS-Rok-CAT	811.7	501.6	1.61822	1648.9	344.2	4.79053	833.6	464.3	1.79539	2.73471		c306/+; +/UAS-Rok-CAT	599.3	277.8	2.15731
c306/+; +/UAS-Rok-CAT	2021.9	341.3	5.92411	1854	483.5	3.83454	1695.7	597	2.84037	4.19967		c306/+; +/UAS-Rok-CAT	488.7	370.4	1.31938
c306/+; +/UAS-Rok-CAT	2232.5	1119.8	1.99366	3434.7	717	4.79038	2938.7	248.2	11.84	6.20803		c306/+; +/UAS-Rok-CAT	1108.5	416.2	2.66338
c306/+; +/UAS-Rok-CAT	3147.3	748.6	4.20425	2885.1	1180.8	2.44334	2211.5	318.1	6.95222	4.53327		c306/+; +/UAS-Rok-CAT	1285.6	528.1	2.43439
c306/+; +/UAS-Rok-CAT	666	159	4.18868	628.2	132.4	4.74471	638.8	178.1	3.58675	4.17338		c306/+; +/UAS-Rok-CAT	938.6	486.5	1.92929
c306/+; +/UAS-Rok-CAT	2031.8	627.9	3.23587	1491.3	319.9	4.66177	1792.7	253.8	7.06344	4.98702		c306/+; +/UAS-Rok-CAT	596.6	511.6	1.16615
c306/+; +/UAS-Rok-CAT	2311.3	426.6	5.41796	1634.1	1313.5	1.24408	1503.2	603.8	2.48957	3.05053		c306/+; +/UAS-Rok-CAT	799.6	451.4	1.77138
c306/+; +/UAS-Rok-CAT	1432.6	661.3	2.16634	2647.2	816.4	3.24253	1773.2	998.1	1.77658	2.39515		c306/+; +/UAS-Rok-CAT	717.4	432.9	1.6572
c306/+; +/UAS-Rok-CAT	1248.1	720.3	1.73275	1193.5	606.3	1.9685	1896.6	556.2	3.40992	2.37039		c306/+; +/UAS-Rok-CAT	563.9	263.6	2.13923
c306/+; +/UAS-Rok-CAT	2397.6	449.3	5.3363	1882.3	541.1	3.47865	3540.6	860.7	4.11363	4.30953		c306/+; +/UAS-Rok-CAT	1565.8	466.1	3.35936
c306/+; +/UAS-Rok-CAT	1247.8	1715.9	0.727199	2383	687	3.4687	2182.6	1060.8	2.0575	2.08447		c306/+; +/UAS-Rok-CAT	1220.6	595.9	2.04833
c306/+; +/UAS-Rok-CAT	622.9	1148.3	0.542454	463.8	858.1	0.540496	872.3	781.1	1.11676	0.733236		c306/+; +/UAS-Rok-CAT	805.1	369.1	2.18125
c306/+; +/UAS-Rok-CAT	598	1108.5	0.539468	703.9	483.6	1.45554	655.3	338.1	1.93818	1.31106		c306/+; +/UAS-Rok-CAT	994	469.1	2.11895
c306/+; +/UAS-Rok-CAT	1042.5	604	1.72599	1331.7	321.6	4.14086	753.9	376.3	2.00345	2.62344		c306/+; +/UAS-Rok-CAT	679.2	632.8	1.07332
c306/+; +/UAS-Rok-CAT	1424.6	504.6	2.82323	1427.4	345.1	4.13619	716	397.8	1.7999	2.91977		c306/+; +/UAS-Rok-CAT	750.2	454.7	1.64988
c306/+; +/UAS-Rok-CAT	801.7	763.1	1.05058	1788.2	1275	1.40251	902	346.7	2.60167	1.68492		c306/+; +/UAS-Rok-CAT	839.1	314.7	2.66635
c306/+; +/UAS-Rok-CAT	3011	933.7	3.2248	1737.7	607.8	2.859	844.1	430.7	1.95983	2.68121		c306/+; +/UAS-Rok-CAT	878.7	462.4	1.9003
c306/+; +/UAS-Rok-CAT	2344.1	879.4	2.66557	1436	587	2.44634	894.3	493.2	1.81326	2.30839		c306/+; +/UAS-Rok-CAT	548.8	366.2	1.49863
c306/+; +/UAS-Rok-CAT	3536.9	710	4.98155	1436	463.2	3.10017	1099.9	1052.9	1.04464	3.04212		c306/+; +/UAS-Rok-CAT	715.1	241.7	2.95863
c306/+; +/UAS-Rok-CAT	1121.9	447.7	2.50592	671.9	488.1	1.37656	455	210.1	2.16564	2.01604		c306/+; +/UAS-Rok-CAT	447.4	283.7	1.57702
c306/+; +/UAS-Rok-CAT	3216	253	12.7115	1421.6	1006.3	1.4127	1973	295	6.68814	6.93743		c306/+; +/UAS-Rok-CAT	1147.6	577.9	1.98581
c306/+; +/UAS-Rok-CAT	756	480.4	1.57369	647.9	310.8	2.08462	628.6	340.2	1.84774	1.83535		c306/+; +/UAS-Rok-CAT	658	351.7	1.87091
c306/+; +/UAS-Rok-CAT	1458.1	999.3	1.45912	3439.8	616.6	5.57866	1264.1	1121.9	1.12675	2.72151		c306/+; +/UAS-Rok-CAT	705.9	406.1	1.73824
c306/+; +/UAS-Rok-CAT	2584	567.7	4.5517	2116.4	646.6	3.27312	915.1	415.9	2.20029	3.3417		c306/+; +/UAS-Rok-CAT	824.3	414.6	1.98818
c306/+; +/UAS-Rok-CAT	1077.6	265.4	4.06029	1547.2	637	2.42889	2067.3	388.1	5.32672	3.93863		c306/+; +/UAS-Rok-CAT	792.2	392	2.02092
