# Supplementary material for: Fascin limits Myosin activity within Drosophila border cells to control substrate stiffness and promote migration
Source: eLife journal article supplement (doi:10.7554/elife.69836), 2021-10-25
Supplement: supp [file elife-69836-supp-v1.zip › elife_poa_e69836_Figure_7_source_data_1.xlsx]

## Sheet: Sheet1
D: Nurse cell pMRLC quan												E: Border cell pMRLC quan						F: AFM
genotype	psqh 1	actin 1	average 1	psqh 2	actin 2	average 2	psqh 3	actin 3	average 3	average total		genotype	Mean pixel intensity of cluster	Mean pixel intensity of background	cluster/background			fascin,c355/fascin;+/+	fascin, c355/fascin; +/UAS-GFP-Fascin
c355/+	638.9	598.9	1.06679	620.7	496	1.25141	490.2	595	0.823866	1.04736		c355/+	496.4	404.4	1.2275			24.94	18.89
c355/+	555.3	404.4	1.37315	400.7	326.1	1.22876	444.6	731.6	0.607709	1.06987		c355/+	478.1	291.1	1.64239			36.88	17.32
c355/+	563.6	705.8	0.798526	574	489	1.17382	614.8	453.1	1.35687	1.10974		c355/+	483.1	434.1	1.11288			44.17	7.56
c355/+	502.6	360.3	1.39495	244.8	226.8	1.07937	279.1	461.2	0.60516	1.02649		c355/+	250.2	165.2	1.51453			17.84	8.74
c355/+	377.7	684.3	0.551951	222.7	205.1	1.08581	280.4	308.7	0.908325	0.848696		c355/+	148.1	160.5	0.922741			39.61	8.21
c355/+	862.2	649.5	1.32748	959.29	1131.5	0.847804	566.6	1248.3	0.453897	0.876395		c355/+	667.9	446.8	1.49485			12.07	5.34
c355/+	354.5	534	0.663858	924	520.4	1.77556	444.7	486.4	0.914268	1.11789		c355/+	420.4	207.1	2.02994			16.36	6.59
c355/+	729.2	1133.96	0.643056	707.7	352.1	2.00994	473.1	915.5	0.516767	1.05659		c355/+	390.1	201.4	1.93694			18.3	8.36
c355/+	908.6	1501.3	0.605209	455	655.7	0.693915	432.2	837.6	0.515998	0.605041		c355/+	385.5	316.6	1.21762			17.27	6.3
c355/+	519.4	1260.5	0.412059	525.9	3100.3	0.169629	516.2	1796.2	0.287384	0.289691		c355/+	467.5	325.4	1.43669			16.54	10.76
c355/+	577.6	805.9	0.716714	939.7	719.1	1.30677	382.8	712.8	0.537037	0.853508		c355/+	695.6	491.6	1.41497			16.3	14.05
c355/+	339.1	485.2	0.698887	336	354.8	0.947012	327.7	509.6	0.643053	0.762984		c355/+	317.7	178.8	1.77685			40.58	12.72
c355/+	200.4	281.9	0.71089	207	241	0.858921	142.6	275.2	0.518169	0.695993		c355/+	133.9	177.9	0.75267			43.28	16.4
c355/+	886.6	682.7	1.29867	498	418.9	1.18883	562	437	1.28604	1.25785		c355/+	613.5	305.7	2.00687			15.09	14.66
c355/+	376.9	203.7	1.85027	418.7	216.2	1.93663	279.8	431.3	0.648736	1.47855		c355/+	280.7	184.6	1.52059			40.3	14.35
c355/+	489.6	475.7	1.02922	290	403.9	0.718	410.7	424.1	0.968404	0.905208		c355/+	1012.7	1203.1	0.841742			38.1	14.42
c355/+	603.8	434.3	1.39028	596.6	502.8	1.18656	621.5	758.6	0.819272	1.13204		c355/+	447.6	445.9	1.00381			16.22	16.53
c355/+	959.1	1128.5	0.849889	956	1627.3	0.587476	682.2	880.1	0.775139	0.737502		c355/+	720.1	644	1.11817			21.43	16.59
c355/+	1007.9	521.6	1.93232	301.5	855.5	0.352425	674.3	850	0.793294	1.02601		c355/+	855.6	757	1.13025			16.12	16.93
c355/+	941.4	213.3	4.4135	1228.3	367.5	3.34231	1033.7	464.6	2.22492	3.32691		c355/+	562.5	474.5	1.18546			39.15	17.42
c355/+	380.3	215	1.76884	586	401.6	1.45916	452.6	233.3	1.93999	1.72266		c355/+	243.8	248.3	0.981877			43.97	17.66
c355/+	597.8	388.3	1.53953	533.9	601.7	0.887319	632.5	931.3	0.679158	1.03534		c355/+	346.6	213.5	1.62342			12.29	16.28
c355/+	318.2	136.7	2.32772	539.6	298.2	1.80952	643	351.6	1.82878	1.98868		c355/+	281.8	243.2	1.15872			15.61	13.25
c355/+	656.3	329.8	1.98999	641.9	557.2	1.15201	1033.6	457.8	2.25775	1.79992		c355/+	450.7	320.6	1.4058			16.78	10.75
c355/+	632.2	1075.8	0.587656	847.3	931.7	0.909413	722.7	1086.3	0.665286	0.720785		c355/+	615.7	471.5	1.30583			16.41	9.63
c355/+	266	1152.6	0.230783	1171.6	802.4	1.46012	625.4	412.5	1.51612	1.06901		c355/+	660.6	788.4	0.8379			25.7	19.9
c355/+	664.7	267.6	2.48393	585.8	296.5	1.97572	686.8	1042	0.659117	1.70626		c355/+	483.9	263.8	1.83434			47.67	22.31
c355/+	939	1142	0.822242	681.7	957.9	0.711661	571.6	368.8	1.54989	1.02793		c355/+	529	350	1.51143			13.43	20.91
c355/+	468.6	662.9	0.706894	397.3	798.2	0.497745	421.4	432	0.975463	0.726701		c355/+	277.3	236.7	1.17153			32.88	21.37
c355/+; +/UAS-GFP-Fascin	337	694	0.485591	321.9	411.4	0.78245	326.1	584.5	0.557913	0.608651		c355/+; +/UAS-GFP-Fascin	635.9	196.6	3.23449			9.81	21.99
c355/+; +/UAS-GFP-Fascin	367.3	690.5	0.531933	588.1	1953.5	0.301049	420.7	671.1	0.626881	0.486621		c355/+; +/UAS-GFP-Fascin	422.8	158.8	2.66247			36.25	21.68
c355/+; +/UAS-GFP-Fascin	809.6	762.6	1.06163	1261.2	921.1	1.36923	692.8	416.8	1.66219	1.36435		c355/+; +/UAS-GFP-Fascin	481.1	189.4	2.54013			34.5	21.05
c355/+; +/UAS-GFP-Fascin	479.8	496.4	0.966559	379.7	887.2	0.427976	570.6	1665.2	0.342662	0.579065		c355/+; +/UAS-GFP-Fascin	436.5	147.4	2.96133			12.6	22.81
c355/+; +/UAS-GFP-Fascin	671.2	287.3	2.33623	2620.3	2091.9	1.25259	723.1	2101.6	0.344071	1.31097		c355/+; +/UAS-GFP-Fascin	580.2	462.2	1.2553			28.06	9.91
c355/+; +/UAS-GFP-Fascin	365.6	460.5	0.79392	554.9	665.2	0.834185	3326.4	2110.7	1.57597	1.06802		c355/+; +/UAS-GFP-Fascin	756.9	610.3	1.24021			14.79	4.54
c355/+; +/UAS-GFP-Fascin	336.3	293.5	1.14583	321.6	292.7	1.09874	430.1	352	1.22188	1.15548		c355/+; +/UAS-GFP-Fascin	277.9	226.9	1.22477			41.67	4.95
c355/+; +/UAS-GFP-Fascin	182.1	106.6	1.70826	680.6	1995.5	0.341067	789	891	0.885522	0.978281		c355/+; +/UAS-GFP-Fascin	507.7	425.2	1.19403			39.03	5.97
c355/+; +/UAS-GFP-Fascin	1571	998.7	1.57304	972.2	1445.7	0.672477	729.7	763.1	0.956231	1.06725		c355/+; +/UAS-GFP-Fascin	841.4	675.3	1.24596			13.3	6.49
c355/+; +/UAS-GFP-Fascin	921.2	776.5	1.18635	1037.9	778	1.33406	1417	1046.5	1.35404	1.29148		c355/+; +/UAS-GFP-Fascin	508.5	413.2	1.23064			40.12	4.93
c355/+; +/UAS-GFP-Fascin	790.6	452.6	1.7468	751.8	1263.5	0.595014	1030	996.1	1.03403	1.12528		c355/+; +/UAS-GFP-Fascin	701.2	555.1	1.2632			18.63	4.87
c355/+; +/UAS-GFP-Fascin	337.4	378	0.892593	293	417	0.702638	320.9	374.7	0.856418	0.817216		c355/+; +/UAS-GFP-Fascin	1082.8	947.9	1.14231			41.33	5.49
c355/+; +/UAS-GFP-Fascin	637	327.4	1.94563	312.7	678	0.461209	199.7	389.6	0.512577	0.97314		c355/+; +/UAS-GFP-Fascin	826.6	835.5	0.989348			31.4	21.77
c355/+; +/UAS-GFP-Fascin	457.5	767.1	0.596402	603.4	1252.9	0.481603	507.7	1176.7	0.431461	0.503155		c355/+; +/UAS-GFP-Fascin	486.6	237.5	2.04884			48.4	7.57
c355/+; +/UAS-GFP-Fascin	478.1	1812.8	0.263736	210	628.1	0.334342	367.1	480.1	0.764632	0.454237		c355/+; +/UAS-GFP-Fascin	251.9	188.3	1.33776			51.58	7.62
c355/+; +/UAS-GFP-Fascin	598.4	670.9	0.891936	417.6	510.3	0.818342	480	394	1.21827	0.976184		c355/+; +/UAS-GFP-Fascin	548.3	313.1	1.7512			42.34	11.93
c355/+; +/UAS-GFP-Fascin	417.8	1893.3	0.220673	248.6	598.2	0.41558	249.2	403.1	0.618209	0.418154		c355/+; +/UAS-GFP-Fascin	186.4	132.6	1.40573			46.64	8.3
c355/+; +/UAS-GFP-Fascin	350.1	966.9	0.362085	493.1	590.8	0.834631	601.2	505.8	1.18861	0.795109		c355/+; +/UAS-GFP-Fascin	308.8	236.1	1.30792			48.94	7.09
c355/+; +/UAS-GFP-Fascin	350.1	966.9	0.362085	493.1	590.8	0.834631	601.2	505.8	1.18861	0.795109		c355/+; +/UAS-GFP-Fascin	358.8	236	1.52034			46.23	6.91
c355/+; +/UAS-GFP-Fascin	503.6	826.1	0.609611	503.9	792.2	0.636077	355.2	414	0.857971	0.70122		c355/+; +/UAS-GFP-Fascin	374.9	234.1	1.60145			45.24	9.39
c355/+; +/UAS-GFP-Fascin	567.8	457.7	1.24055	701.8	622.7	1.12703	925.2	1028.9	0.899213	1.08893		c355/+; +/UAS-GFP-Fascin	527.5	362.9	1.45357			12.44	8.08
c355/+; +/UAS-GFP-Fascin	926.6	369.2	2.50975	1092.8	1009.7	1.0823	1119.2	850.7	1.31562	1.63589		c355/+; +/UAS-GFP-Fascin	681.1	577.6	1.17919			43.57	8.7
c355/+; +/UAS-GFP-Fascin	366.9	814.2	0.450626	660.8	664.6	0.994282	564.2	1218.9	0.462876	0.635928		c355/+; +/UAS-GFP-Fascin	534.9	384.2	1.39224			22.29	8.88
c355/+; +/UAS-GFP-Fascin	517.5	590.3	0.876673	458.4	798.1	0.574364	392.7	477.7	0.822064	0.7577		c355/+; +/UAS-GFP-Fascin	338.5	239.3	1.41454			18.61	8.3
c355/+; +/UAS-GFP-Fascin	390.4	589.8	0.661919	279.6	479.7	0.582864	311	446.7	0.696217	0.647		c355/+; +/UAS-GFP-Fascin	202.3	158.2	1.27876			40.65	7.66
sn28, c355/sn28	426.8	427.6	0.998129	252.6	481	0.525156	383.2	371.1	1.03261	0.851964		fascin, c355/fascin	1163.9	254.9	4.5661			16.3	4.99
sn28, c355/sn28	2010.8	2784.4	0.722166	2789.1	3904.9	0.714256	3124.1	2283.6	1.36806	0.934827		fascin, c355/fascin	902.5	334.8	2.69564			44.48	7.17
sn28, c355/sn28	657.8	353.9	1.85872	1123.6	522.4	2.15084	1538.3	326.6	4.71004	2.90653		fascin, c355/fascin	811.26	420.8	1.9279			51.56	4.37
sn28, c355/sn28	823.2	1269.3	0.648546	1170.7	1111.5	1.05326	1580.4	479.5	3.29593	1.66591		fascin, c355/fascin	943.5	308.9	3.05439			30.75	25
sn28, c355/sn28	1314.7	240.6	5.46426	1426.3	223.1	6.3931	1248.2	310.2	4.02386	5.29374		fascin, c355/fascin	960.6	134.2	7.15797			19.95	25.07
sn28, c355/sn28	1429.3	447.5	3.19397	1850.8	696.6	2.6569	1539.2	630	2.44317	2.76468		fascin, c355/fascin	1377.6	501.6	2.74641			46.14	24.52
sn28, c355/sn28	11226.5	847.1	13.2529	1028.9	873.2	1.17831	1003.6	1810.6	0.554291	4.99515		fascin, c355/fascin	710.6	439.2	1.61794			40.95	24.67
sn28, c355/sn28	387.8	270	1.4363	549	454.9	1.20686	591.4	447.4	1.32186	1.32167		fascin, c355/fascin	705.4	155.5	4.53633			42.18	26.61
sn28, c355/sn28	565.1	416.5	1.35678	438.3	346.6	1.26457	950.6	346.2	2.74581	1.78905		fascin, c355/fascin	440.1	217.1	2.02718			40.91	26.47
sn28, c355/sn28	846.4	1130.9	0.74843	989	311.9	3.17089	482.1	502.2	0.959976	1.62643		fascin, c355/fascin	378.4	171.4	2.2077			17.03	26.21
sn28, c355/sn28	2019.1	750.9	2.68891	1890.2	975.3	1.93807	1194.6	683.4	1.74802	2.125		fascin, c355/fascin	512.3	246.6	2.07745			42.18	26.14
sn28, c355/sn28	398.1	126.8	3.13959	295.8	121.4	2.43657	328.4	229.6	1.43031	2.33549		fascin, c355/fascin	466.6	251.2	1.85748			42.32	26.69
sn28, c355/sn28	1021.9	517.7	1.97392	985.3	767.3	1.28411	1521.9	1194.3	1.2743	1.51078		fascin, c355/fascin	457.8	97.2	4.70988			26.83	26.3
sn28, c355/sn28	420	703	0.59744	321.8	474.7	0.677902	401.4	506.1	0.793124	0.689488		fascin, c355/fascin	371.7	202.5	1.83556			15.45	26.73
sn28, c355/sn28	327.4	347.2	0.942972	370.8	238.8	1.55276	321.8	464.4	0.692937	1.06289		fascin, c355/fascin	295.2	113.1	2.61008			30.87	23.48
sn28, c355/sn28	289.8	257.6	1.125	298	521	0.571977	220.6	468.4	0.470965	0.722647		fascin, c355/fascin	157.9	109.8	1.43807			34.45	31.71
sn28, c355/sn28	1090.2	952.2	1.14493	700	990	0.707071	862.7	752.9	1.14584	0.999278		fascin, c355/fascin	1142.4	154.7	7.38462			14.42	35.48
sn28, c355/sn28	2348.6	1640.8	1.43137	1609	602.7	2.66965	1493.5	591.5	2.52494	2.20865		fascin, c355/fascin	1402.1	719.5	1.94871			18.06	34.17
sn28, c355/sn28	1141.8	846.7	1.34853	1129.2	535.3	2.10947	871.1	338.4	2.57417	2.01072		fascin, c355/fascin	1165.5	435.8	2.67439			40.62	36.2
sn28, c355/sn28	362.3	325.4	1.1134	492.9	371.1	1.32821	440.1	533.3	0.825239	1.08895		fascin, c355/fascin	893.6	265.1	3.3708			19.59	28.22
sn28, c355/sn28; +/UAS-GFP-Fascin	314.8	1572.8	0.200153	403.6	2222.9	0.181565	256.7	1038.2	0.247255	0.209657		fascin, c355/fascin ; +/UAS-GFP-Fascin	731.8	272.9	2.68157			27.5	18.51
sn28, c355/sn28; +/UAS-GFP-Fascin	357.8	1339.8	0.267055	371.9	1021.8	0.363966	448.9	822.5	0.545775	0.392265		fascin, c355/fascin ; +/UAS-GFP-Fascin	417.2	243.2	1.71546			16.07	17.25
sn28, c355/sn28; +/UAS-GFP-Fascin	477.2	859.8	0.555013	726.5	655.6	1.10815	427.1	412.8	1.03464	0.899266		fascin, c355/fascin ; +/UAS-GFP-Fascin	512.5	357.6	1.43317			41.59	29.63
sn28, c355/sn28; +/UAS-GFP-Fascin	243.5	237.2	1.02656	172.1	255.4	0.673845	173.3	276.3	0.627217	0.775874		fascin, c355/fascin ; +/UAS-GFP-Fascin	229.8	114.2	2.01226			36.49	30.21
sn28, c355/sn28; +/UAS-GFP-Fascin	486.5	755.6	0.643859	624	364.8	1.71053	493	423.2	1.16493	1.17311		fascin, c355/fascin ; +/UAS-GFP-Fascin	598.6	321.7	1.86074			21.35	30.54
sn28, c355/sn28; +/UAS-GFP-Fascin	784	1487.1	0.527201	652.5	471.9	1.38271	828.4	231.7	3.57531	1.82841		fascin, c355/fascin ; +/UAS-GFP-Fascin	794.6	577.9	1.37498			20.22	18.89
sn28, c355/sn28; +/UAS-GFP-Fascin	280.9	389.3	#VALUE!	409.4	384.1	1.06587	507	813.3	0.623386	#VALUE!		fascin, c355/fascin ; +/UAS-GFP-Fascin	554.3	232.2	2.38717			15.9	20.34
sn28, c355/sn28; +/UAS-GFP-Fascin	769.2	1531.4	0.502285	891.3	940.6	0.947587	874	834	1.04796	0.832611		fascin, c355/fascin ; +/UAS-GFP-Fascin	500.1	441.6	1.13247			33.76	34.82
sn28, c355/sn28; +/UAS-GFP-Fascin	279.2	559.2	0.499285	323.2	506.6	0.637979	209.1	537.2	0.389241	0.508835		fascin, c355/fascin ; +/UAS-GFP-Fascin	252.4	150.3	1.67931			30.55	38.7
sn28, c355/sn28; +/UAS-GFP-Fascin	575	517.8	1.11047	384.2	535.8	0.717059	416.5	333.1	1.25038	1.02597		fascin, c355/fascin ; +/UAS-GFP-Fascin	446.5	227.2	1.96523			45.92	37.07
sn28, c355/sn28; +/UAS-GFP-Fascin	1110.3	1427.3	0.777902	816.5	1311.1	0.62276	1032	1930	0.534715	0.645126		fascin, c355/fascin ; +/UAS-GFP-Fascin	740.5	544.8	1.35921			42.54	8.59
sn28, c355/sn28; +/UAS-GFP-Fascin	817.2	736.3	1.10987	1214	1182	1.02707	991.8	1721.2	0.576226	0.904391		fascin, c355/fascin ; +/UAS-GFP-Fascin	1327.3	583.9	2.27316			43.99	24.51
sn28, c355/sn28; +/UAS-GFP-Fascin	950	855.7	1.1102	747.5	537.7	1.39018	726.1	451.9	1.60677	1.36905		fascin, c355/fascin ; +/UAS-GFP-Fascin	568.1	484.9	1.17158			41.42	24.36
sn28, c355/sn28; +/UAS-GFP-Fascin	1292.5	2006.3	0.644221	1823.5	910.9	2.00187	1904.5	1467.5	1.29779	1.31462		fascin, c355/fascin ; +/UAS-GFP-Fascin	835	637.1	1.31063			18.16	24.45
sn28, c355/sn28; +/UAS-GFP-Fascin	1078.6	384.6	2.80447	1177.7	541.2	2.17609	1007	595.6	1.69073	2.22376		fascin, c355/fascin ; +/UAS-GFP-Fascin	726.8	625.9	1.16121			35.58	18.83
sn28, c355/sn28; +/UAS-GFP-Fascin	687.3	1521.6	0.451696	556.9	1407.7	0.39561	660.5	1130.2	0.58441	0.477238		fascin, c355/fascin ; +/UAS-GFP-Fascin	603.2	452.9	1.33186			43.31	19
sn28/sn28; +/UGF	773	216.8	3.5655	490.5	414.2	1.18421	343.5	188.7	1.82035	2.19002		fascin-/-; +/UAS GFP-Fascin	393.4	144.9	2.71498			30.69	24.41
sn28/sn28; +/UGF	789.6	396	1.99394	544.3	155.7	3.49583	411	176.6	2.32729	2.60569		fascin-/-; +/UAS GFP-Fascin	295.5	102.5	2.88293			39.29	24.72
sn28/sn28; +/UGF	241.6	195.2	1.2377	159.9	156.2	1.02369	179.3	118.3	1.51564	1.25901		fascin-/-; +/UAS GFP-Fascin	228.2	75.5	3.02252			46.21	25.09
sn28/sn28; +/UGF	769.6	526.5	1.46173	1055.7	448.9	2.35175	1358.4	449.2	3.02404	2.27917		fascin-/-; +/UAS GFP-Fascin	445.4	205	2.17268			17.27	25.37
sn28/sn28; +/UGF	313.5	285.6	1.09769	730.1	240.6	3.0345	358.9	206.4	1.73886	1.95701		fascin-/-; +/UAS GFP-Fascin	405.7	107.2	3.78451			12.83	25.95
sn28/sn28; +/UGF	605.1	203.5	2.97346	539.3	233.8	2.30667	535.1	269.3	1.987	2.42238		fascin-/-; +/UAS GFP-Fascin	451	183.9	2.45242			38.52	25.62
sn28/sn28; +/UGF	495.7	164.6	3.01154	630	235.7	2.67289	596.1	231.1	2.5794	2.75461		fascin-/-; +/UAS GFP-Fascin	318.7	139.7	2.28132			36.22	25.72
sn28/sn28; +/UGF	881.8	594.4	1.48351	683.4	714.3	0.956741	534.1	420.1	1.27136	1.23721		fascin-/-; +/UAS GFP-Fascin	421	116.6	3.61063			16.55	24.82
sn28/sn28; +/UGF	722	242.9	2.97242	625	187.1	3.34046	668.4	395.1	1.69172	2.6682		fascin-/-; +/UAS GFP-Fascin	398.1	163.5	2.43486			7.92	25.2
sn28/sn28; +/UGF	363.6	178.6	2.03583	363.8	119.7	3.03926	346.6	205.8	1.68416	2.25309		fascin-/-; +/UAS GFP-Fascin	187.4	168.7	1.11085			7.64	25.64
sn28/sn28; +/UGF	246.5	132.1	1.86601	364.3	343.1	1.06179	325	244	1.33197	1.41992		fascin-/-; +/UAS GFP-Fascin	181.7	107.7	1.68709			6.47	16.71
sn28/sn28; +/UGF	508	258	1.96899	595.7	86.7	6.87082	338.8	88.5	3.82825	4.22269		fascin-/-; +/UAS GFP-Fascin	282.4	209.3	1.34926			6.22	14.47
sn28/sn28; +/UGF	516.8	229.4	2.25283	262.3	128.2	2.04602	378.4	105.9	3.57318	2.62401		fascin-/-; +/UAS GFP-Fascin	150.3	113.5	1.32423			7.87	13.17
sn28/sn28; +/UGF	1318.7	152.2	8.66426	943.8	300.8	3.13763	501.4	251.6	1.99285	4.59825		fascin-/-; +/UAS GFP-Fascin	391.2	255.5	1.53112			4.01	5.74
sn28/sn28; +/UGF	450	240	1.875	294.2	290.5	1.01274	440.6	207.6	2.12235	1.67003		fascin-/-; +/UAS GFP-Fascin	206.3	174.6	1.18156			12.65	7.31
sn28/sn28; +/UGF	278.1	156.7	1.77473	256.5	158.9	1.61422	361	163	2.21472	1.86789		fascin-/-; +/UAS GFP-Fascin	146.6	78.1	1.87708			24.29	5.84
sn28/sn28; +/UGF	141.9	146.1	0.971253	131.2	150.2	0.873502	157.9	250	0.6316	0.825452		fascin-/-; +/UAS GFP-Fascin	139.8	77.7	1.79923			23.83	8.16
sn28/sn28; +/UGF	470.4	370.4	1.26998	301.9	236.5	1.27653	365.6	536.2	0.681835	1.07612		fascin-/-; +/UAS GFP-Fascin	192.4	190.2	1.01157			25.4	7.97
sn28/sn28; +/UGF	892.1	422.1	2.11348	767.3	634.4	1.20949	579.9	482.9	1.20087	1.50795		fascin-/-; +/UAS GFP-Fascin	253.3	240.5	1.05322			14.24	7.18
sn28/sn28; +/UGF	753.9	899.9	0.83776	1742.2	782.6	2.22617	909.1	373.5	2.434	1.83264		fascin-/-; +/UAS GFP-Fascin	494.4	228.5	2.16368			20.87	12.03
sn28/sn28; +/UGF	1073.8	876.6	1.22496	832.4	936.1	0.889221	464	347.1	1.33679	1.15032		fascin-/-; +/UAS GFP-Fascin	454.3	280.2	1.62134			25.64	13.66
sn28/sn28; +/UGF	1007.9	828.4	1.21668	552.8	875.6	0.631339	922.9	862.5	1.07003	0.972683		fascin-/-; +/UAS GFP-Fascin	460.1	274.5	1.67614			12.17	13.16
sn28/sn28; +/UGF	1059	1430	0.740559	1733.4	821	2.11133	619.2	855.1	0.724126	1.192		fascin-/-; +/UAS GFP-Fascin	495.5	267.9	1.84957			20.9	11.18
sn28/sn28; +/UGF	1496.6	392.6	3.81202	1172.7	232.3	5.04821	756.6	377.6	2.00371	3.62131		fascin-/-; +/UAS GFP-Fascin	500.8	388.7	1.2884			17.37	14.66
sn28/sn28; +/UGF	523	682.8	0.765964	635.3	395.7	1.60551	619.1	291.8	2.12166	1.49771		fascin-/-; +/UAS GFP-Fascin	747.6	349.2	2.14089			5.35	14.34
sn28/sn28; +/UGF	576	289.6	1.98895	482	351.2	1.37244	656	813.4	0.806491	1.38929		fascin-/-; +/UAS GFP-Fascin	438.2	167.1	2.62238			16.98	14.55
sn28/sn28; +/UGF	529.3	534.6	0.990086	710	358.8	1.97882	1184.4	440.1	2.69121	1.8867		fascin-/-; +/UAS GFP-Fascin	707.1	412.4	1.7146			7.59	14.79
sn28/sn28; +/UGF	1499.7	510.5	2.93771	1563.2	775	2.01703	832.8	870.4	0.956801	1.97051		fascin-/-; +/UAS GFP-Fascin	391.8	263.8	1.48522			6.55	14.96
																		10.32	13.66
																		14.73	14.11
																		18.31	11.52
																		27.13	13.6
																		26.08	13.9
																		26.92	13.4
																		24.97	12.32
																		26.97	13.71
																		29.84	19.63
																		26.15	11.27
																		30.32	14.05
																		27.25	14.25
																		25.5	14.41
																		24.97	14.28
																		73.03	14.32
																		71.55	14.66
																		64.49	25.14
																		79.54	21.85
																		69.11	15.25
																		68.5	15.79
																		72.88	18.74
																		73.04	35.31
																		67.42	14.41
																		85.15	33.9
																		90.24	35.13
																		87.83	19.12
																		78.12	13.47
																		68.83	8.48
																		70.68	8.13
																		58.85	7.86
																		61.07	6.25
																		76.18	8.03
																		61.49	7.19
																		73.5	7.92
																		79.31	12.5
																		81.83	34.02
																		56.79	7.5
																		76.85	7.17
																		58.03	5.75
																		60.43	6.84
																		67.69	7.58
																		62.61	7.01
																		78.62	6.94
																		41.88	19.34
																		46.47	15.06
																		85.85	6.22
																		90.01	7.55
																		90.85	9.31
																		37.29	8.26
																		39.86	8.61
																		44.99	4.16
																		32.31	8.14
																		44.3	23.9
																		41.98	20.27
																		40.06	15.05
																		40.05	17.62
																		42.59	16.36
																		32.43	16.73
																		44.34	16.66
																		27.45	16.7
																		27.78	13.72
																		49.08	41.62
																		50.49	40.86
																		53.23	40.32
																		52.15	29.96
																		53.47	41.83
																		51.48	43.08
																		51.02	41.89
																		49.16	43.21
																		50.01	34.18
																		52.28	35.66
																		52.32	32.88
																		49.28	34.12
																		48.32	33.77
																		45.28	33.44
																		51.86	31.38
																		49.83	32.87
																		44	33.3
																		66.04	11.15
																		66.13	21.08
																		64.67	12.83
																		64.65	13.59
																		66.99	11.8
																		64.11	14.15
																		66.23	13.3
																		52.98	13.37
																		48.74	9.89
																		48.45	31.54
																		51.11	29.32
																		50.17	31.23
																		50.34	28.95
																		49.33	32.81
																		49.5	32.76
																			31.55
																			30.66
																			31.48
																			32.51
																			35.7
																			35.11
																			37.63
																			37.51
																			38.05
																			37.86
																			37.21
																			29
																			30.41
																			25.61
																			24.28
																			21.43
																			24.63
																			25.92
																			22.15
																			30.21
																			30.34
																			28.19
																			27.83
																			32.02
																			32.48
																			30.39
																			32.25
