# Supplementary figures and images for: Fascin limits Myosin activity within Drosophila border cells to control substrate stiffness and promote migration
Source: eLife journal article supplement (doi:10.7554/elife.69836), 2021-10-25

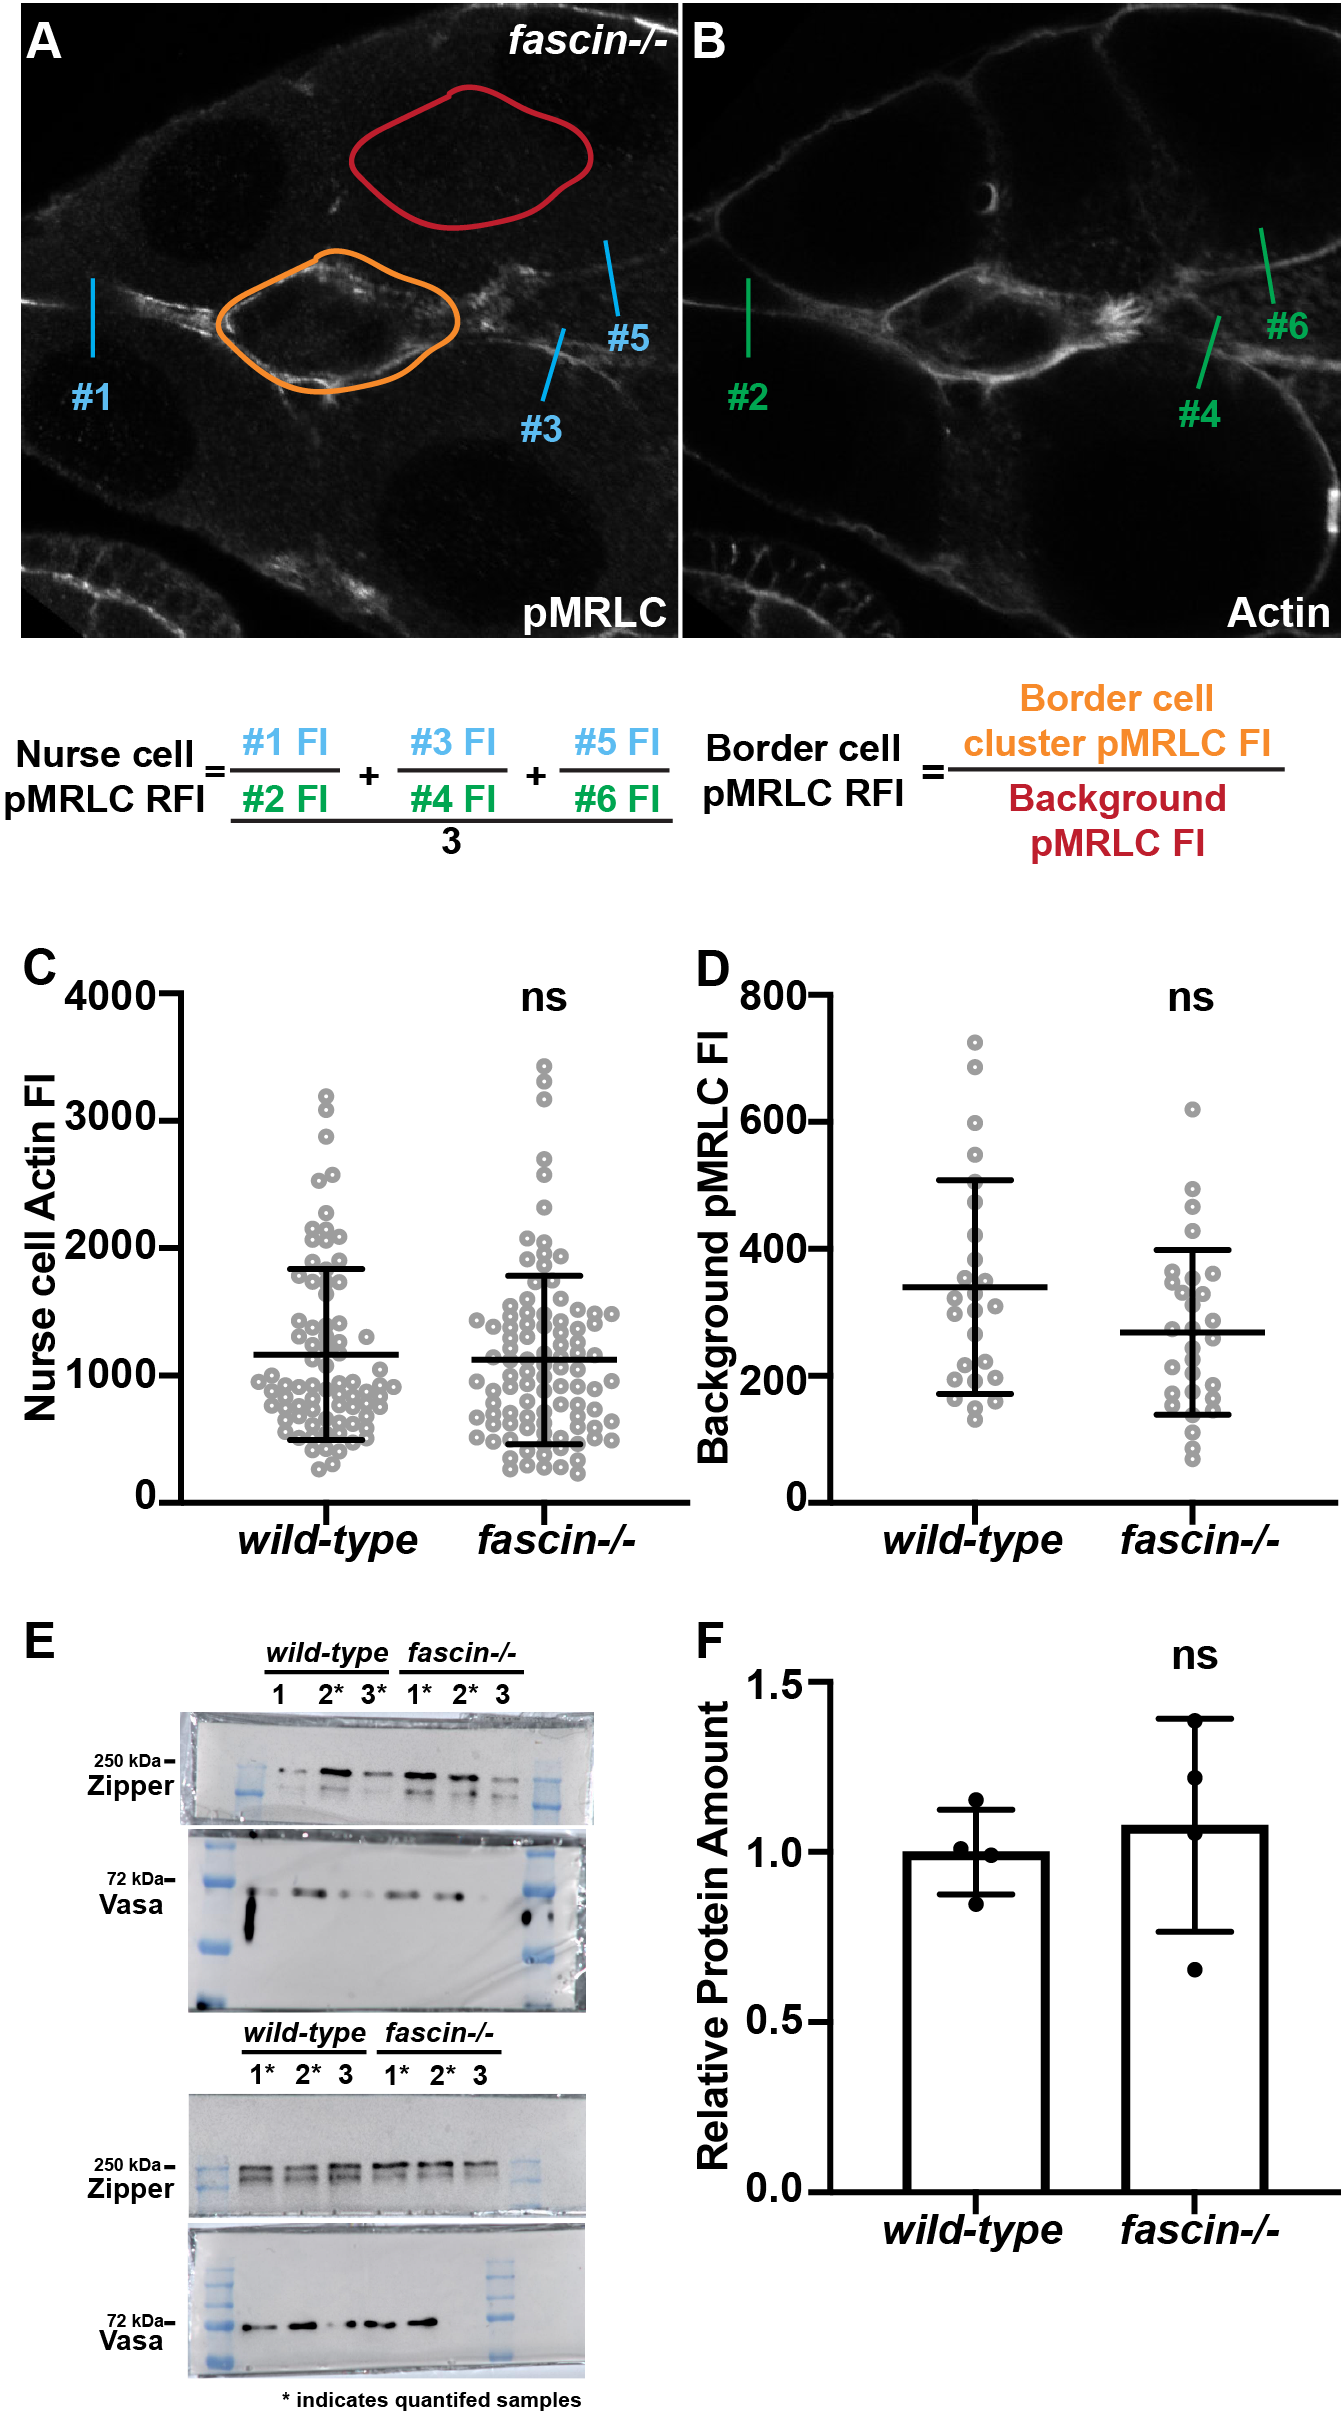

Supplement: supp [file elife-69836-supp-v1.zip › elife_poa_e69836_Figure_2_figure_supplement_1.png]

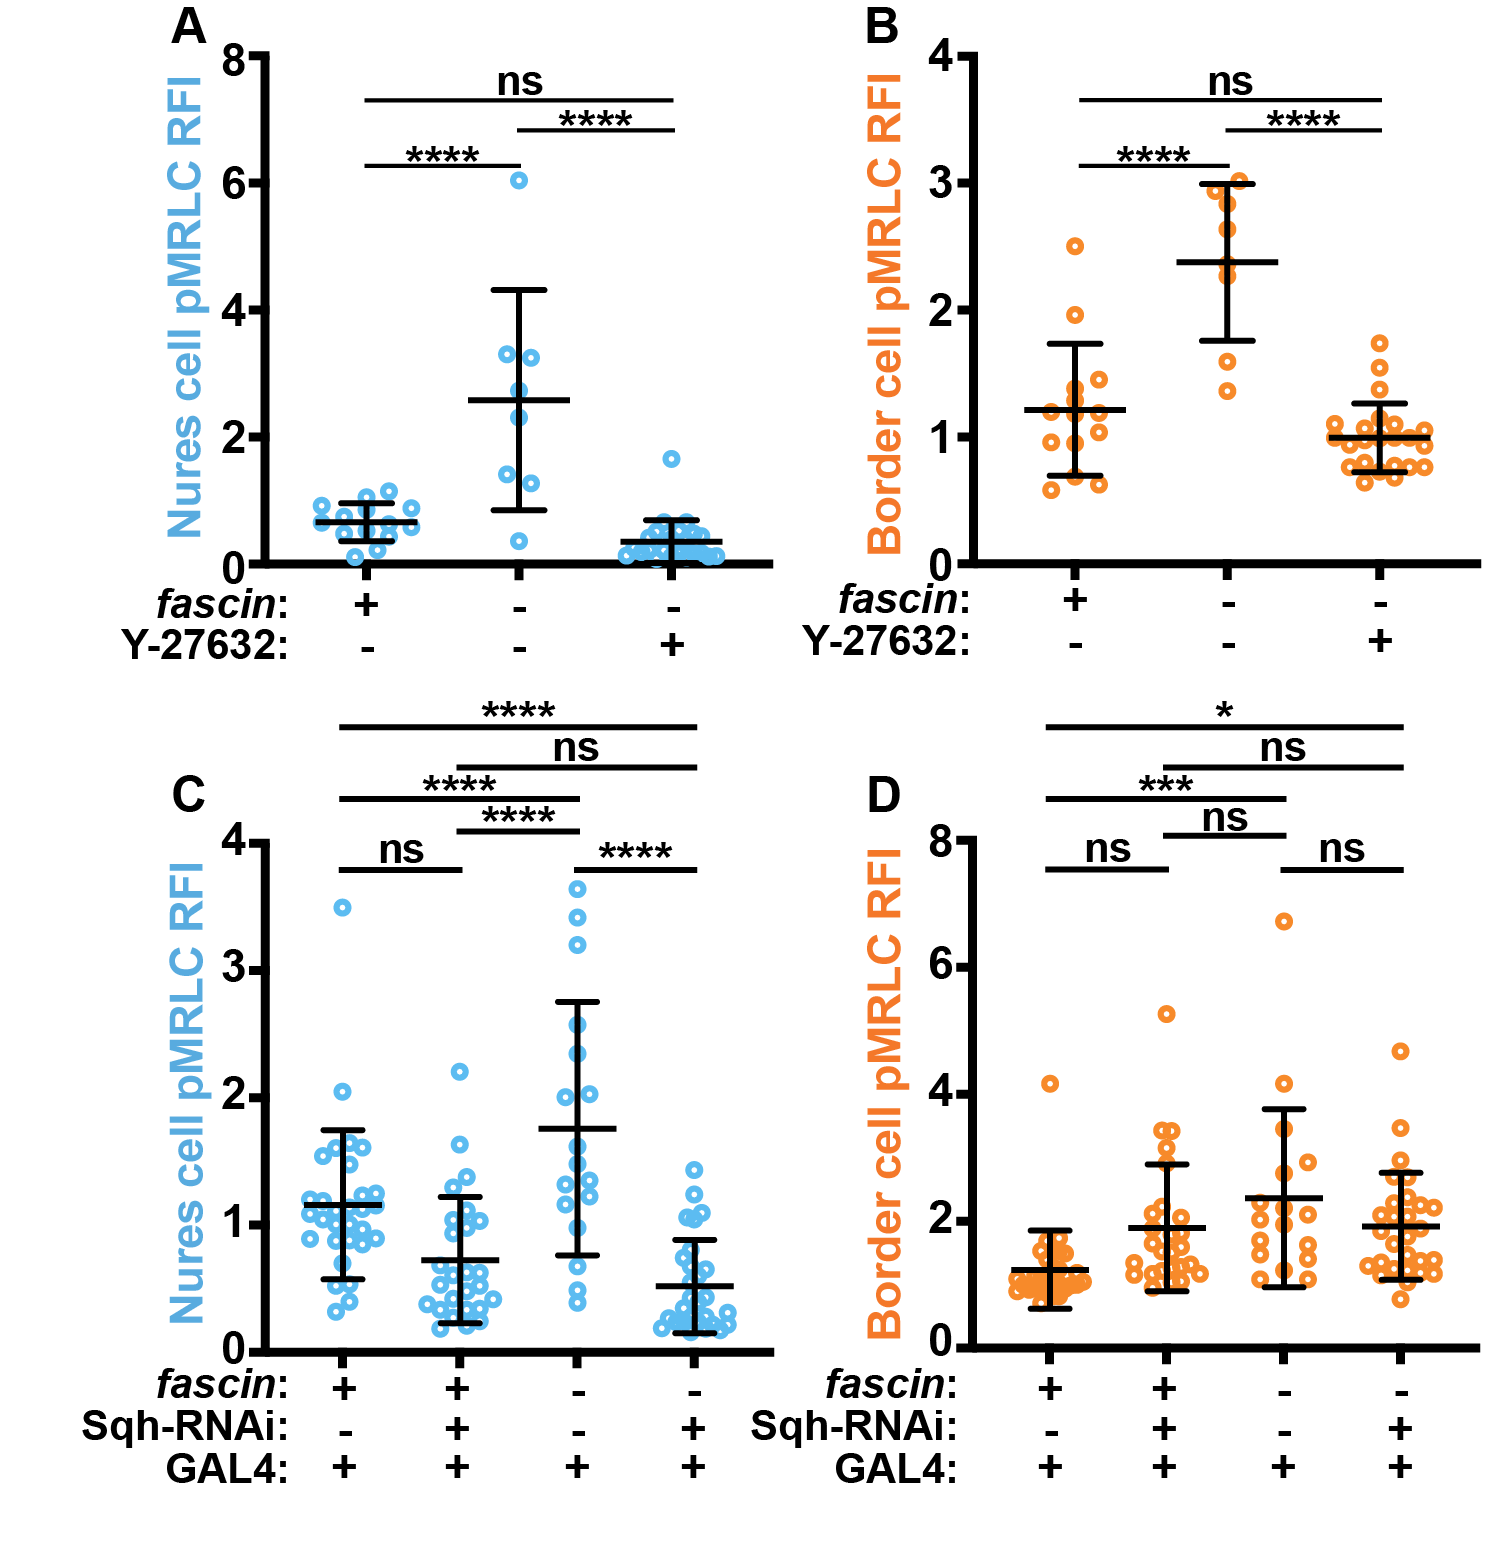

Supplement: supp [file elife-69836-supp-v1.zip › elife_poa_e69836_Figure_4_figure_supplement_1.png]

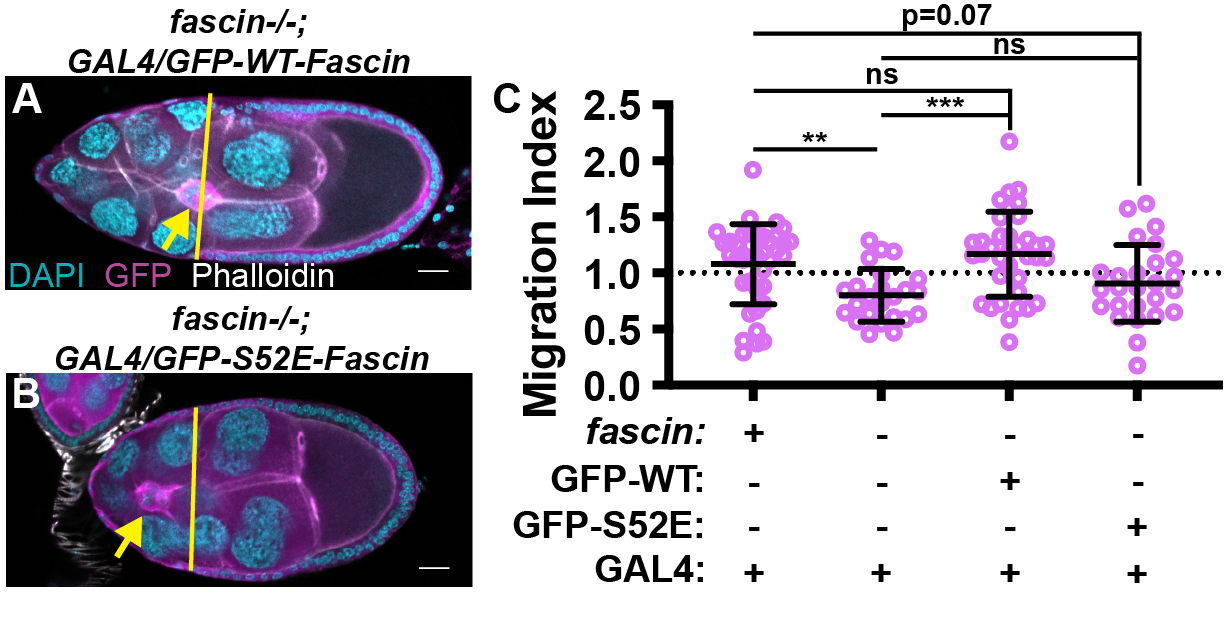

Supplement: supp [file elife-69836-supp-v1.zip › elife_poa_e69836_Figure_5_figure_supplement_1.png]

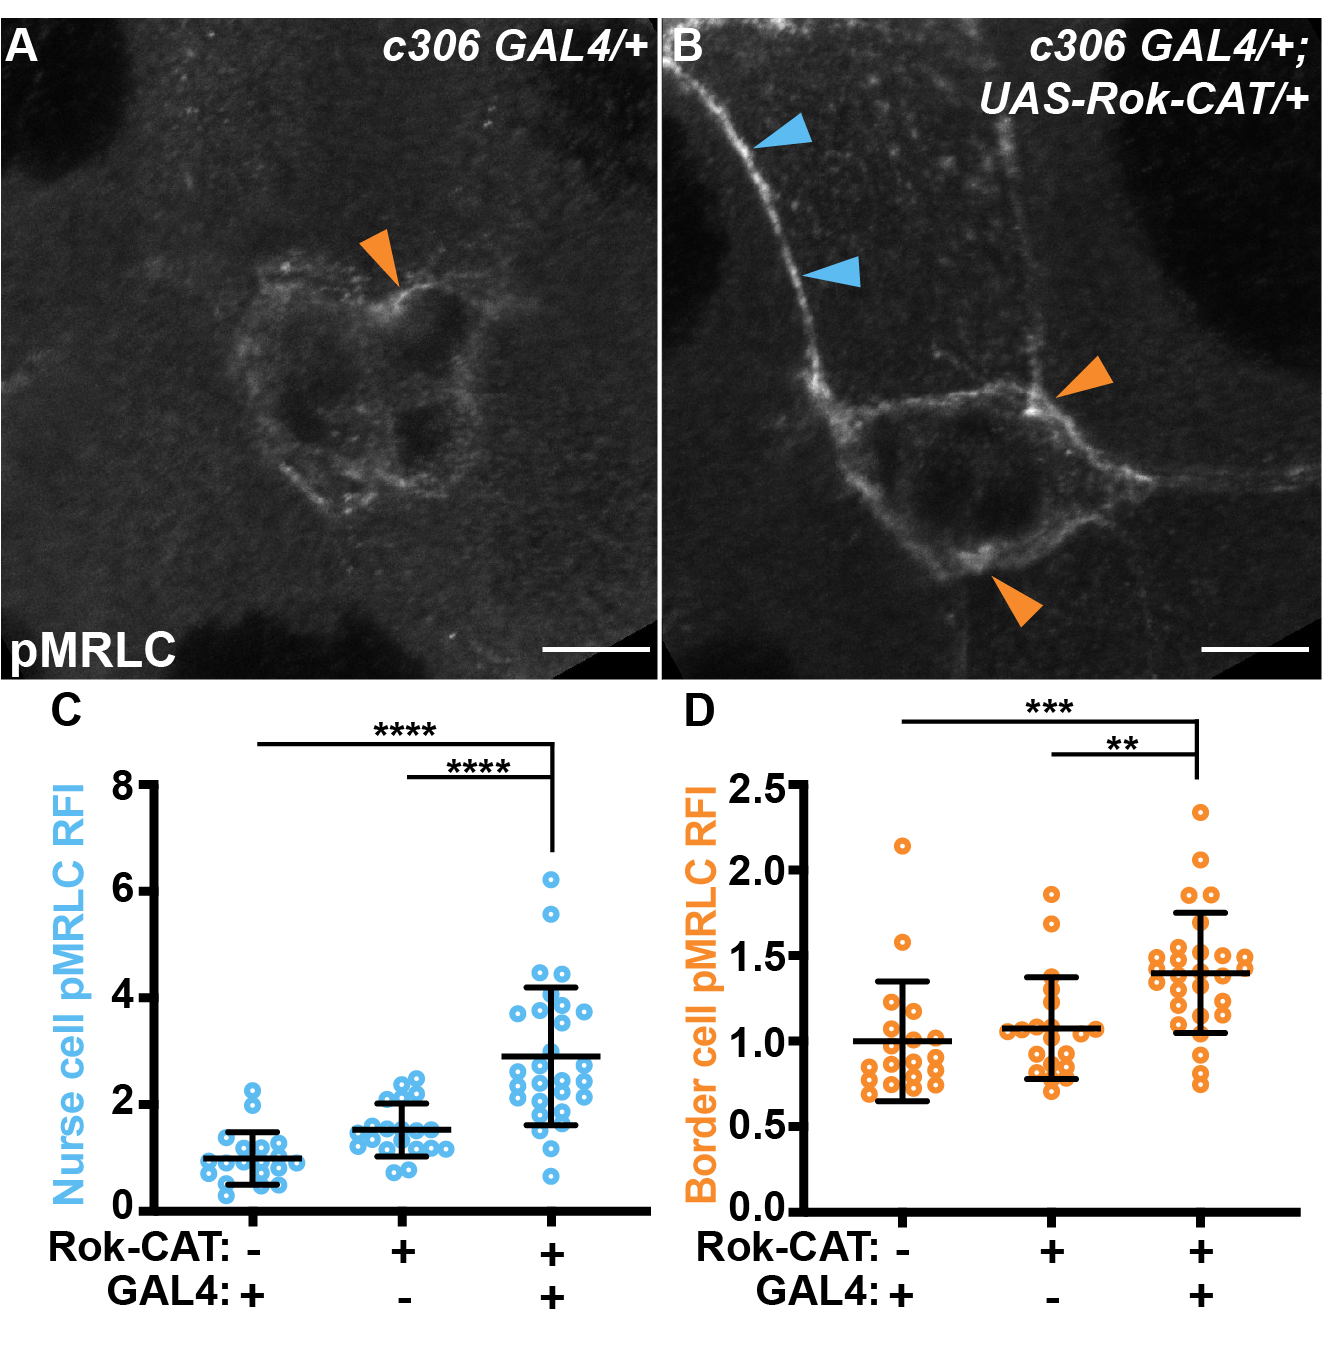

Supplement: supp [file elife-69836-supp-v1.zip › elife_poa_e69836_Figure_7_figure_supplement_1.png]
